# Supplementary material for: Epigenetically dysregulated genes and pathways implicated in the pathogenesis of non-syndromic high myopia
Source: PubMed Central journal article supplement (PMC6411983; doi:10.1038/s41598-019-40299-x), 2019-03-11

## Supplementary file

Title: **Epigenetically dysregulated genes and pathways implicated in the pathogenesis of non-syndromic high myopia**

Sangeetha Vishweswaraiah<sup>1</sup>, Joanna Swierkowska<sup>2</sup>, Uppala Ratnamala<sup>3</sup>, Nitish K Mishra<sup>4</sup>, Chittibabu Guda<sup>4</sup>, Shiva S Chettiar<sup>5</sup>, Kaid R Johar<sup>5</sup>, Malgorzata Mrugacz<sup>6</sup>, Justyna A. Karolak<sup>7</sup>, Marzena Gajecka<sup>2,7</sup>, Uppala Radhakrishna<sup>1</sup>

1. Department of Obstetrics and Gynecology, Oakland University William Beaumont School of Medicine, Royal Oak, MI, USA
2. Institute of Human Genetics, Polish Academy of Sciences, Poznan, Poland
3. Department of Pharmacology, Creighton University, Omaha, NE, USA
4. Department of Genetics, Cell Biology & Anatomy College of Medicine, University of Nebraska Medical Center Omaha, NE, USA
5. Department of Zoology, School of Sciences, Gujarat University, Ahmedabad-380009, India
6. Department of Ophthalmology and Eye Rehabilitation, Medical University of Bialystok, Bialystok, Poland
7. Department of Genetics and Pharmaceutical Microbiology, Poznan University of Medical Sciences, Poznan, Poland

<sup>1</sup>To whom correspondences should be addressed.

Email: [Uppala.Radhakrishna@beaumont.edu](mailto:Uppala.Radhakrishna@beaumont.edu)

The authors declare no competing financial interests.

## **Supplementary Material headings**

**Supplementary Table S1.** Details of CpG targets significantly differentially methylated in myopia. Target ID, Gene ID, chromosome, FDR p-value, fold change, % methylation and AUC details are given

**Supplementary Table S2.** Target ID, Gene ID, chromosome, FDR p-value, fold change, % methylation and AUC details of Open Reading Frames (ORF)

**Supplementary Table S3.** Target ID, Gene ID, chromosome, FDR p-value, fold change, % methylation and AUC details of LOC genes

**Supplementary Figure 1A.** Wnt gene interaction network based on pathway prediction

**Supplementary Figure 1B.** Wnt gene interaction network based on physical interaction

**Supplementary Table S1:**

| Target ID  | CHR | Genes             | FDR p-Val   | Fold change | % Methylation |          | AUC  | CI    |       |
|------------|-----|-------------------|-------------|-------------|---------------|----------|------|-------|-------|
|            |     |                   |             |             | Cases         | Controls |      | lower | upper |
| cg26526312 | 15  | LINGO1            | 1.90898E-39 | 11.06       | 11.75         | 1.06     | 0.83 | 0.69  | 0.96  |
| cg21790796 | 5   | KIF20A; BRD8      | 4.0599E-38  | 7.80        | 8.62          | 1.11     | 0.85 | 0.73  | 0.98  |
| cg03902565 | 5   | NNT               | 3.3224E-38  | 6.63        | 9.10          | 1.37     | 0.85 | 0.73  | 0.98  |
| cg24745548 | 2   | GMPPA             | 3.35327E-39 | 6.17        | 12.07         | 1.96     | 0.78 | 0.63  | 0.94  |
| cg15388430 | 22  | POLDIP3; RNU12    | 1.98883E-06 | 6.14        | 4.26          | 0.69     | 0.81 | 0.67  | 0.96  |
| cg21630368 | 11  | CREBZF            | 2.01866E-09 | 6.04        | 5.47          | 0.91     | 0.83 | 0.69  | 0.97  |
| cg23316161 | 12  | ZNF605            | 2.96846E-06 | 5.98        | 4.21          | 0.70     | 0.78 | 0.63  | 0.93  |
| cg14421548 | 9   | RORB              | 1.06967E-37 | 5.86        | 7.79          | 1.33     | 0.82 | 0.69  | 0.96  |
| cg14700647 | 10  | ASAH2B            | 1.42318E-07 | 5.76        | 4.82          | 0.84     | 0.79 | 0.64  | 0.94  |
| cg00115101 | 1   | THRAP3            | 4.25325E-06 | 5.61        | 4.22          | 0.75     | 0.77 | 0.62  | 0.93  |
| cg11048311 | 10  | UPF2              | 1.39971E-06 | 5.41        | 4.48          | 0.83     | 0.77 | 0.62  | 0.93  |
| cg01263292 | 12  | IRAK3             | 2.73835E-05 | 5.40        | 3.88          | 0.72     | 0.80 | 0.65  | 0.95  |
| cg09442143 | 9   | ERCC6L2           | 3.58535E-38 | 5.13        | 9.50          | 1.85     | 0.80 | 0.66  | 0.95  |
| cg22547764 | 3   | ETV5              | 9.62643E-39 | 5.06        | 11.26         | 2.22     | 0.75 | 0.59  | 0.91  |
| cg25320221 | 1   | SMG7              | 1.95586E-14 | 5.01        | 7.71          | 1.54     | 0.89 | 0.78  | 1.00  |
| cg18649601 | 1   | ZC3H11A           | 2.2453E-38  | 4.98        | 10.19         | 2.05     | 0.81 | 0.67  | 0.95  |
| cg12725906 | 1   | ARPC5; RGL1       | 3.06815E-07 | 4.85        | 4.95          | 1.02     | 0.81 | 0.67  | 0.96  |
| cg19125926 | 11  | TMEM25            | 2.38802E-40 | 4.83        | 16.05         | 3.32     | 0.79 | 0.64  | 0.94  |
| cg10115182 | 2   | PSMD14            | 8.88106E-13 | 4.82        | 7.22          | 1.50     | 0.82 | 0.69  | 0.96  |
| cg10413944 | 2   | AP1S3             | 4.51031E-11 | 4.80        | 6.57          | 1.37     | 0.80 | 0.66  | 0.95  |
| cg00662647 | 1   | SLC35F3           | 7.54948E-10 | 4.80        | 6.08          | 1.26     | 0.81 | 0.67  | 0.96  |
| cg05966809 | 5   | SNX24             | 9.14296E-15 | 4.63        | 8.12          | 1.75     | 0.77 | 0.62  | 0.93  |
| cg13745645 | 15  | FAM189A1          | 0.00011697  | 4.62        | 3.76          | 0.81     | 0.83 | 0.69  | 0.96  |
| cg21054968 | 7   | INSIG1            | 6.44803E-39 | 4.53        | 12.13         | 2.68     | 0.85 | 0.72  | 0.98  |
| cg05983883 | 8   | POLR2K            | 0.000184995 | 4.51        | 3.68          | 0.82     | 0.77 | 0.61  | 0.92  |
| cg11944815 | 12  | DHX37             | 3.22544E-05 | 4.51        | 4.09          | 0.91     | 0.83 | 0.70  | 0.97  |
| cg18188134 | 16  | PHLPP2            | 8.91907E-38 | 4.50        | 8.56          | 1.90     | 0.75 | 0.59  | 0.91  |
| cg15721164 | 14  | MNAT1             | 2.03334E-38 | 4.48        | 10.62         | 2.37     | 0.90 | 0.80  | 1.00  |
| cg21393421 | 1   | RPL22             | 3.54887E-07 | 4.31        | 5.15          | 1.20     | 0.76 | 0.60  | 0.92  |
| cg04226724 | 1   | LPHN2             | 8.33343E-07 | 4.30        | 4.98          | 1.16     | 0.78 | 0.63  | 0.93  |
| cg06404175 | 20  | OXT               | 5.19511E-42 | 4.27        | 21.20         | 4.97     | 0.89 | 0.77  | 1.00  |
| cg20597714 | 1   | SLC35E2           | 0.000508488 | 4.27        | 3.50          | 0.82     | 0.81 | 0.67  | 0.96  |
| cg18947032 | 10  | KIAA1279          | 3.07998E-38 | 4.17        | 10.27         | 2.46     | 0.81 | 0.66  | 0.95  |
| cg17341933 | 17  | BAIAP2; FLJ90757  | 8.09852E-08 | 4.17        | 5.53          | 1.32     | 0.77 | 0.62  | 0.93  |
| cg00167654 | 17  | WSCD1             | 4.60365E-38 | 4.15        | 9.72          | 2.34     | 0.76 | 0.60  | 0.92  |
| cg19354091 | 18  | SERPINB8          | 2.89987E-08 | 4.13        | 5.77          | 1.40     | 0.84 | 0.70  | 0.97  |
| cg19767580 | 16  | CYLD              | 1.28021E-12 | 4.09        | 7.70          | 1.88     | 0.78 | 0.63  | 0.94  |
| cg05996236 | 5   | ZNF354B           | 9.50019E-39 | 4.08        | 11.99         | 2.94     | 0.84 | 0.71  | 0.97  |
| cg24942285 | 3   | DHX30             | 3.18786E-10 | 4.08        | 6.69          | 1.64     | 0.78 | 0.63  | 0.94  |
| cg12166292 | 2   | NABP1             | 0.000430086 | 4.06        | 3.62          | 0.89     | 0.78 | 0.63  | 0.93  |
| cg13758646 | 9   | GABBR2            | 0.034892886 | 4.05        | 2.28          | 0.56     | 0.80 | 0.65  | 0.95  |
| cg00439706 | 15  | MGA               | 3.42498E-09 | 4.04        | 6.26          | 1.55     | 0.77 | 0.62  | 0.93  |
| cg14757267 | 19  | RPL18AP3; RPL18A  | 2.2053E-07  | 4.03        | 5.41          | 1.34     | 0.78 | 0.62  | 0.93  |
| cg09552183 | 12  | ZNF84             | 6.02736E-07 | 4.01        | 5.21          | 1.30     | 0.80 | 0.65  | 0.94  |
| cg23799720 | 16  | VWOX              | 8.4541E-12  | 4.00        | 7.44          | 1.86     | 0.82 | 0.69  | 0.96  |
| cg05984388 | 16  | MAPK3             | 4.09409E-15 | 4.00        | 8.89          | 2.22     | 0.82 | 0.69  | 0.96  |
| cg22762844 | 2   | MAL               | 2.36814E-38 | 3.98        | 10.80         | 2.71     | 0.79 | 0.64  | 0.94  |
| cg15708001 | 12  | CBX5; HNRNPA1     | 7.84728E-05 | 3.98        | 4.09          | 1.03     | 0.82 | 0.68  | 0.96  |
| cg04829746 | 11  | LPXN; CNTF; ZFP91 | 0.000166056 | 3.98        | 3.90          | 0.98     | 0.80 | 0.66  | 0.95  |
| cg15304692 | 7   | REPIN1            | 7.19024E-09 | 3.96        | 6.17          | 1.56     | 0.80 | 0.66  | 0.95  |

|            |    |                |             |      |       |      |      |      |      |
|------------|----|----------------|-------------|------|-------|------|------|------|------|
| cg14109663 | 19 | HSD11B1L       | 1.54679E-06 | 3.95 | 5.03  | 1.27 | 0.86 | 0.73 | 0.98 |
| cg12380909 | 8  | NKAIN3         | 2.72314E-14 | 3.95 | 8.54  | 2.16 | 0.77 | 0.61 | 0.92 |
| cg08261878 | 2  | IHH            | 2.38278E-07 | 3.95 | 5.44  | 1.38 | 0.85 | 0.72 | 0.98 |
| cg03293513 | 16 | NME3           | 1.27745E-10 | 3.94 | 6.98  | 1.77 | 0.79 | 0.64 | 0.94 |
| cg19336883 | 11 | PRDX5; TRMT112 | 4.68764E-38 | 3.94 | 9.86  | 2.50 | 0.92 | 0.82 | 1.00 |
| cg03250058 | 1  | CHTOP; S100A13 | 7.79215E-05 | 3.91 | 4.12  | 1.05 | 0.80 | 0.65 | 0.95 |
| cg05659223 | 19 | RFX1           | 0.000433127 | 3.91 | 3.68  | 0.94 | 0.75 | 0.58 | 0.91 |
| cg16337295 | 6  | HSP90AB1       | 0.003016453 | 3.89 | 3.13  | 0.80 | 0.90 | 0.79 | 1.00 |
| cg18414379 | 12 | RNF10          | 0.005533233 | 3.83 | 2.96  | 0.77 | 0.89 | 0.77 | 1.00 |
| cg12430845 | 5  | NIPBL          | 1.52094E-07 | 3.82 | 5.63  | 1.47 | 0.84 | 0.70 | 0.97 |
| cg07023902 | 2  | INO80B         | 6.28031E-06 | 3.82 | 4.79  | 1.25 | 0.76 | 0.60 | 0.92 |
| cg20960422 | 2  | SLC39A10       | 1.3713E-13  | 3.81 | 8.42  | 2.21 | 0.78 | 0.63 | 0.93 |
| cg10610482 | 11 | ATM; NPAT      | 6.6139E-10  | 3.80 | 6.79  | 1.79 | 0.77 | 0.62 | 0.93 |
| cg26215849 | 13 | MTRF1          | 3.91586E-42 | 3.79 | 22.40 | 5.91 | 0.81 | 0.67 | 0.95 |
| cg04017116 | 1  | RPAP2; GLMN    | 1.69136E-06 | 3.78 | 5.12  | 1.36 | 0.81 | 0.66 | 0.95 |
| cg09037869 | 4  | SMIM20         | 1.21727E-13 | 3.75 | 8.52  | 2.27 | 0.77 | 0.62 | 0.93 |
| cg23246901 | 12 | SLC24A6        | 8.28851E-42 | 3.75 | 21.58 | 5.76 | 0.86 | 0.74 | 0.99 |
| cg19905754 | 4  | ANKRD37        | 0.008795052 | 3.74 | 2.84  | 0.76 | 0.80 | 0.65 | 0.95 |
| cg27516438 | 19 | SSBP4          | 7.26312E-39 | 3.63 | 12.88 | 3.55 | 0.87 | 0.75 | 0.99 |
| cg10563352 | 2  | COL4A3; COL4A4 | 1.45291E-05 | 3.63 | 4.71  | 1.30 | 0.76 | 0.60 | 0.92 |
| cg20942339 | 12 | SCN8A          | 5.82378E-11 | 3.61 | 7.49  | 2.08 | 0.79 | 0.64 | 0.94 |
| cg14809226 | 17 | HIC1           | 2.84422E-08 | 3.60 | 6.18  | 1.72 | 0.93 | 0.84 | 1.00 |
| cg09961571 | 19 | MRPS12; SARS2  | 3.37299E-41 | 3.60 | 20.15 | 5.59 | 0.88 | 0.76 | 1.00 |
| cg21194937 | 19 | AP3D1          | 5.37231E-07 | 3.60 | 5.52  | 1.53 | 0.87 | 0.75 | 0.99 |
| cg04127233 | 4  | CORIN          | 2.12984E-38 | 3.57 | 11.40 | 3.20 | 0.86 | 0.74 | 0.99 |
| cg05173517 | 12 | RHOF           | 2.14545E-09 | 3.56 | 6.79  | 1.91 | 0.87 | 0.75 | 0.99 |
| cg25022560 | 1  | SLC41A1        | 0.021476776 | 3.56 | 2.59  | 0.73 | 0.77 | 0.62 | 0.93 |
| cg14622441 | 17 | RASL10B        | 3.98916E-12 | 3.56 | 8.10  | 2.28 | 0.76 | 0.60 | 0.92 |
| cg05476169 | 22 | CBY1           | 0.001025668 | 3.56 | 3.59  | 1.01 | 0.77 | 0.62 | 0.93 |
| cg03589372 | 16 | BCKDK          | 3.39741E-06 | 3.55 | 5.12  | 1.44 | 0.79 | 0.64 | 0.94 |
| cg19808285 | 20 | RALGAPA2       | 1.74505E-05 | 3.55 | 4.71  | 1.33 | 0.85 | 0.72 | 0.98 |
| cg22261911 | 6  | AGPAT1         | 0.002385205 | 3.54 | 3.34  | 0.94 | 0.79 | 0.64 | 0.94 |
| cg12102151 | 20 | SLMO2          | 8.34531E-09 | 3.54 | 6.52  | 1.84 | 0.81 | 0.67 | 0.96 |
| cg11026330 | 4  | LCORL          | 2.47674E-08 | 3.51 | 6.31  | 1.79 | 0.75 | 0.58 | 0.91 |
| cg06699275 | 11 | MTL5           | 0.001021569 | 3.51 | 3.62  | 1.03 | 0.90 | 0.79 | 1.00 |
| cg18709605 | 12 | FICD           | 2.2029E-07  | 3.49 | 5.83  | 1.67 | 0.78 | 0.62 | 0.93 |
| cg26029682 | 1  | PTGFRN         | 6.85582E-38 | 3.48 | 9.75  | 2.80 | 0.81 | 0.67 | 0.96 |
| cg21704267 | 15 | STARD9         | 9.0534E-07  | 3.48 | 5.51  | 1.58 | 0.82 | 0.69 | 0.96 |
| cg07358015 | 8  | INTS9; HMBOX1  | 3.32883E-12 | 3.48 | 8.25  | 2.37 | 0.82 | 0.69 | 0.96 |
| cg19515530 | 4  | UBA6           | 1.17606E-07 | 3.47 | 5.99  | 1.73 | 0.80 | 0.65 | 0.95 |
| cg02121891 | 3  | BBX            | 3.90866E-13 | 3.47 | 8.71  | 2.51 | 0.87 | 0.75 | 0.99 |
| cg08278991 | 10 | NDST2          | 1.133E-07   | 3.45 | 6.03  | 1.75 | 0.77 | 0.61 | 0.92 |
| cg14933266 | 17 | NF1            | 0.001266904 | 3.44 | 3.59  | 1.04 | 0.82 | 0.68 | 0.96 |
| cg24443885 | 19 | ZNF227         | 4.43326E-05 | 3.43 | 4.56  | 1.33 | 0.86 | 0.73 | 0.98 |
| cg07205462 | 20 | SNRPB2         | 2.55412E-12 | 3.38 | 8.46  | 2.50 | 0.90 | 0.80 | 1.00 |
| cg00510859 | 2  | SLC30A3        | 7.35649E-07 | 3.38 | 5.65  | 1.67 | 0.78 | 0.63 | 0.93 |
| cg17649531 | 2  | NCL            | 0.000628147 | 3.36 | 3.86  | 1.15 | 0.78 | 0.63 | 0.93 |
| cg15687240 | 1  | RRAGC          | 6.52701E-05 | 3.35 | 4.52  | 1.35 | 0.78 | 0.63 | 0.94 |
| cg24626312 | 17 | HOXB5          | 5.46473E-05 | 3.35 | 4.57  | 1.36 | 0.79 | 0.64 | 0.94 |
| cg23073439 | 6  | KDM1B; TPMT    | 5.40498E-10 | 3.34 | 7.38  | 2.21 | 0.81 | 0.67 | 0.95 |
| cg24040382 | 1  | WDR26          | 1.49178E-07 | 3.33 | 6.09  | 1.83 | 0.79 | 0.64 | 0.94 |
| cg25544621 | 8  | LRRC14; RECQL4 | 1.27315E-08 | 3.33 | 6.68  | 2.01 | 0.75 | 0.59 | 0.91 |
| cg16349255 | 15 | MTFMT          | 0.000338982 | 3.32 | 4.06  | 1.22 | 0.80 | 0.65 | 0.94 |
| cg07002382 | 15 | MFAP1          | 5.16207E-06 | 3.31 | 5.23  | 1.58 | 0.75 | 0.58 | 0.91 |

|               |    |               |             |      |       |      |      |      |      |
|---------------|----|---------------|-------------|------|-------|------|------|------|------|
| cg27016163    | 2  | HOXD13        | 1.14038E-43 | 3.29 | 27.97 | 8.50 | 0.86 | 0.74 | 0.99 |
| cg18500286    | 4  | AFF1          | 3.77571E-15 | 3.29 | 9.91  | 3.01 | 0.79 | 0.64 | 0.94 |
| cg08739233    | 1  | SHISA4        | 0.000143946 | 3.28 | 4.34  | 1.32 | 0.76 | 0.60 | 0.92 |
| cg13710595    | 15 | BAHD1         | 0.000807059 | 3.26 | 3.84  | 1.18 | 0.77 | 0.62 | 0.93 |
| cg06862673    | 17 | CDK12         | 2.89426E-41 | 3.21 | 21.35 | 6.66 | 0.91 | 0.81 | 1.00 |
| cg08869036    | 8  | RDH10; RPL7   | 0.003213262 | 3.20 | 3.43  | 1.07 | 0.79 | 0.64 | 0.94 |
| cg21070498    | 1  | WDR78; MIER1  | 0.0001871   | 3.19 | 4.34  | 1.36 | 0.77 | 0.62 | 0.93 |
| cg15042246    | 8  | CA2           | 0.039701042 | 3.18 | 2.49  | 0.78 | 0.79 | 0.64 | 0.94 |
| cg00032336    | 17 | TTC19; ZSWIM7 | 1.09716E-05 | 3.17 | 5.16  | 1.63 | 0.86 | 0.73 | 0.98 |
| cg00763151    | 12 | SLC25A3       | 9.4199E-06  | 3.16 | 5.22  | 1.65 | 0.83 | 0.70 | 0.97 |
| cg13284181    | 12 | ZNF140        | 1.64447E-07 | 3.15 | 6.29  | 1.99 | 0.75 | 0.58 | 0.91 |
| cg22626663    | 17 | SPAG7         | 0.001345668 | 3.15 | 3.75  | 1.19 | 0.80 | 0.66 | 0.95 |
| cg22830701    | 11 | BDNFOS        | 1.16484E-05 | 3.15 | 5.17  | 1.64 | 0.77 | 0.62 | 0.93 |
| cg16327227    | 2  | DTNB          | 0.047861363 | 3.15 | 2.42  | 0.77 | 0.76 | 0.60 | 0.92 |
| cg25743719    | 2  | HPCAL1        | 9.77435E-39 | 3.14 | 13.24 | 4.22 | 0.77 | 0.62 | 0.93 |
| cg03974185    | 12 | UNG           | 9.30605E-06 | 3.13 | 5.25  | 1.68 | 0.85 | 0.71 | 0.98 |
| cg14993543    | 7  | FOXP1         | 2.55031E-07 | 3.13 | 6.20  | 1.98 | 0.75 | 0.58 | 0.91 |
| cg09693243    | 9  | ASTN2; TRIM32 | 0.000400153 | 3.13 | 4.16  | 1.33 | 0.82 | 0.68 | 0.96 |
| cg11662678    | 2  | DGUOK         | 7.2708E-09  | 3.13 | 7.10  | 2.27 | 0.79 | 0.64 | 0.94 |
| cg19532257    | 2  | KIF5C         | 1.0475E-11  | 3.11 | 8.66  | 2.78 | 0.84 | 0.70 | 0.97 |
| cg15421984    | 5  | RICTOR        | 1.29425E-07 | 3.11 | 6.41  | 2.06 | 0.79 | 0.64 | 0.94 |
| cg07311313    | 13 | CDX2          | 6.05819E-10 | 3.10 | 7.74  | 2.50 | 0.80 | 0.65 | 0.94 |
| cg16645584    | 1  | JUN           | 4.15333E-40 | 3.10 | 18.00 | 5.81 | 0.85 | 0.71 | 0.98 |
| cg26080798    | 6  | E2F3          | 3.26225E-39 | 3.09 | 15.01 | 4.86 | 0.88 | 0.76 | 0.99 |
| cg18840956    | 5  | PCSK1         | 3.47947E-15 | 3.08 | 10.55 | 3.42 | 0.82 | 0.69 | 0.96 |
| cg03238298    | 18 | DTNA          | 2.83095E-38 | 3.08 | 11.71 | 3.81 | 0.75 | 0.59 | 0.91 |
| ch.18.658499F | 18 | RPRD1A        | 7.26851E-39 | 3.07 | 13.82 | 4.50 | 0.85 | 0.73 | 0.98 |
| cg17303299    | 12 | ENO2          | 2.85041E-06 | 3.05 | 5.67  | 1.86 | 0.81 | 0.67 | 0.96 |
| cg20755690    | 1  | MRPL55        | 0.006121793 | 3.05 | 3.30  | 1.08 | 0.81 | 0.66 | 0.95 |
| cg18219532    | 7  | DMTF1         | 3.78064E-38 | 3.05 | 11.30 | 3.71 | 0.79 | 0.64 | 0.94 |
| cg14021564    | 10 | PSD           | 4.82998E-07 | 3.04 | 6.18  | 2.03 | 0.84 | 0.71 | 0.97 |
| cg24005309    | 10 | IDI1          | 0.000742238 | 3.03 | 4.05  | 1.34 | 0.90 | 0.79 | 1.00 |
| cg12968518    | 2  | ACVR2A        | 2.33986E-39 | 3.02 | 15.66 | 5.18 | 0.85 | 0.72 | 0.98 |
| cg27002185    | 11 | CDKN1C        | 0.000138678 | 3.02 | 4.59  | 1.52 | 0.84 | 0.71 | 0.97 |
| cg16998883    | 1  | TAF13         | 0.001327733 | 3.01 | 3.87  | 1.28 | 0.81 | 0.66 | 0.95 |
| cg11347840    | 17 | SMARCE1       | 7.54536E-42 | 3.01 | 23.83 | 7.92 | 0.89 | 0.78 | 1.00 |
| cg22129639    | 15 | TP53BP1       | 2.31323E-05 | 3.01 | 5.14  | 1.71 | 0.79 | 0.64 | 0.94 |
| cg09996344    | 7  | KCTD7         | 2.20478E-40 | 3.00 | 19.20 | 6.40 | 0.85 | 0.71 | 0.98 |
| cg09190219    | 12 | CD63          | 2.94717E-38 | 3.00 | 11.80 | 3.94 | 0.78 | 0.62 | 0.93 |
| cg16837525    | 21 | DYRK1A        | 0.003308985 | 2.99 | 3.57  | 1.19 | 0.76 | 0.60 | 0.92 |
| cg13688524    | 5  | BOD1          | 2.09642E-05 | 2.98 | 5.20  | 1.74 | 0.76 | 0.60 | 0.92 |
| cg25062542    | 1  | ATP1A1        | 1.43417E-39 | 2.98 | 16.51 | 5.54 | 0.83 | 0.69 | 0.96 |
| cg19349348    | 2  | TCF7L1        | 0.026701409 | 2.98 | 2.76  | 0.93 | 0.81 | 0.66 | 0.95 |
| cg22561749    | 1  | RGS2          | 7.76522E-07 | 2.97 | 6.14  | 2.07 | 0.75 | 0.59 | 0.91 |
| cg06547404    | 2  | PARD3B        | 0.001602522 | 2.97 | 3.84  | 1.29 | 0.76 | 0.60 | 0.92 |
| cg16882097    | 18 | NPC1          | 0.00027128  | 2.97 | 4.43  | 1.49 | 0.83 | 0.70 | 0.97 |
| cg08887356    | 15 | PARP16        | 0.000686056 | 2.96 | 4.13  | 1.40 | 0.75 | 0.59 | 0.91 |
| cg12940406    | 17 | IKZF3         | 0.000314265 | 2.96 | 4.39  | 1.48 | 0.78 | 0.62 | 0.93 |
| cg09276368    | 10 | SLIT1         | 3.25554E-15 | 2.96 | 11.05 | 3.73 | 0.76 | 0.60 | 0.92 |
| cg07448771    | 11 | SUV420H1      | 0.000962508 | 2.94 | 4.04  | 1.37 | 0.83 | 0.69 | 0.96 |
| cg06666025    | 16 | CMTM2         | 2.24531E-07 | 2.92 | 6.58  | 2.26 | 0.84 | 0.71 | 0.97 |
| cg02273875    | 9  | ST6GALNAC4    | 3.49947E-05 | 2.91 | 5.14  | 1.77 | 0.90 | 0.79 | 1.00 |
| cg07627390    | 16 | PALB2; DCTN5  | 7.49425E-06 | 2.91 | 5.60  | 1.93 | 0.77 | 0.61 | 0.92 |
| cg26976390    | 11 | ZBTB16        | 1.19403E-38 | 2.90 | 13.44 | 4.63 | 0.83 | 0.70 | 0.97 |

|                |    |                        |             |      |       |      |      |      |      |
|----------------|----|------------------------|-------------|------|-------|------|------|------|------|
| cg22355463     | 4  | ZNF827                 | 4.80985E-42 | 2.90 | 24.89 | 8.58 | 0.87 | 0.75 | 0.99 |
| cg15044280     | 9  | NFIB                   | 2.50795E-38 | 2.89 | 12.27 | 4.24 | 0.77 | 0.61 | 0.92 |
| cg27159088     | 17 | TEX14                  | 5.18422E-12 | 2.88 | 9.39  | 3.26 | 0.84 | 0.70 | 0.97 |
| ch.13.1783356F | 13 | COL4A2                 | 1.36464E-39 | 2.88 | 16.88 | 5.86 | 0.78 | 0.63 | 0.93 |
| cg11447942     | 9  | PIP5KL1                | 6.27599E-06 | 2.86 | 5.72  | 2.00 | 0.88 | 0.76 | 0.99 |
| cg12531974     | 9  | PBX3                   | 0.022411751 | 2.85 | 2.92  | 1.02 | 0.81 | 0.67 | 0.95 |
| cg18739577     | 12 | LTA4H                  | 4.2215E-09  | 2.84 | 7.79  | 2.74 | 0.84 | 0.71 | 0.97 |
| cg04090241     | 3  | TBL1XR1                | 8.98172E-14 | 2.84 | 10.51 | 3.70 | 0.89 | 0.78 | 1.00 |
| cg27496650     | 8  | TOX                    | 1.14258E-42 | 2.83 | 27.12 | 9.58 | 0.75 | 0.59 | 0.91 |
| cg06529883     | 20 | PLCB4                  | 2.05608E-38 | 2.83 | 12.75 | 4.51 | 0.80 | 0.65 | 0.94 |
| cg00207100     | 15 | UBE2Q2P2;<br>GOLGA6L10 | 9.74603E-12 | 2.82 | 9.41  | 3.33 | 0.86 | 0.74 | 0.99 |
| cg10566589     | 6  | TRAF3IP2               | 0.003564621 | 2.82 | 3.68  | 1.30 | 0.78 | 0.63 | 0.93 |
| cg05184864     | 8  | CPSF1                  | 0.023253402 | 2.82 | 2.92  | 1.04 | 0.80 | 0.66 | 0.95 |
| cg05086178     | 16 | PDPK1                  | 2.20443E-11 | 2.82 | 9.21  | 3.27 | 0.78 | 0.62 | 0.93 |
| cg25189007     | 15 | CCPG1                  | 6.61493E-07 | 2.81 | 6.47  | 2.30 | 0.87 | 0.75 | 0.99 |
| cg15825264     | 17 | ELP2P; GEMIN4          | 6.4652E-05  | 2.81 | 5.09  | 1.81 | 0.87 | 0.75 | 0.99 |
| ch.22.772318F  | 22 | NAGA                   | 3.46221E-38 | 2.80 | 11.95 | 4.26 | 0.93 | 0.84 | 1.00 |
| cg11026382     | 1  | PRKACB                 | 3.98929E-39 | 2.80 | 15.46 | 5.52 | 0.79 | 0.64 | 0.94 |
| cg05702851     | 4  | CCDC109B               | 0.001102861 | 2.80 | 4.13  | 1.48 | 0.78 | 0.62 | 0.93 |
| cg12567844     | 18 | ANKRD29                | 1.04611E-09 | 2.79 | 8.28  | 2.96 | 0.75 | 0.58 | 0.91 |
| cg11944735     | 9  | ZCCHC6                 | 2.74145E-38 | 2.79 | 12.36 | 4.42 | 0.81 | 0.67 | 0.96 |
| cg10815272     | 5  | PARP8                  | 0.018453743 | 2.78 | 3.05  | 1.10 | 0.78 | 0.63 | 0.93 |
| cg23649731     | 14 | ATG2B; GSKIP           | 5.62849E-39 | 2.78 | 14.99 | 5.40 | 0.80 | 0.66 | 0.95 |
| cg09949642     | 1  | RCOR3                  | 0.001124013 | 2.78 | 4.16  | 1.50 | 0.81 | 0.66 | 0.95 |
| cg17016394     | 21 | OLIG1                  | 1.65208E-12 | 2.77 | 10.03 | 3.62 | 0.78 | 0.62 | 0.93 |
| cg10576261     | 7  | AVL9; LSM5             | 0.001863049 | 2.77 | 3.98  | 1.44 | 0.80 | 0.65 | 0.94 |
| cg23037274     | 19 | MAP2K7                 | 0.006774099 | 2.77 | 3.48  | 1.26 | 0.79 | 0.63 | 0.94 |
| cg13757989     | 19 | ZNF235                 | 2.24523E-05 | 2.77 | 5.48  | 1.98 | 0.79 | 0.64 | 0.94 |
| cg22519756     | 1  | CTBS                   | 0.000555763 | 2.76 | 4.42  | 1.60 | 0.86 | 0.73 | 0.98 |
| cg16434372     | 6  | BRP44L                 | 1.90304E-42 | 2.76 | 26.85 | 9.73 | 0.86 | 0.73 | 0.98 |
| cg10327723     | 19 | SAFB; SAFB2            | 0.004050392 | 2.75 | 3.70  | 1.34 | 0.75 | 0.59 | 0.91 |
| cg16093752     | 17 | RAC3                   | 0.028493171 | 2.75 | 2.88  | 1.05 | 0.84 | 0.71 | 0.97 |
| cg13779055     | 10 | NRP1                   | 6.36063E-39 | 2.75 | 14.87 | 5.41 | 0.81 | 0.67 | 0.95 |
| cg27236875     | 2  | ERBB4                  | 3.37765E-39 | 2.75 | 15.90 | 5.78 | 0.83 | 0.70 | 0.97 |
| cg07918776     | 15 | SHC4; EID1             | 1.75384E-10 | 2.75 | 8.89  | 3.23 | 0.89 | 0.77 | 1.00 |
| cg18874502     | 12 | ZNF26                  | 1.49931E-38 | 2.75 | 13.48 | 4.91 | 0.79 | 0.64 | 0.94 |
| cg23967249     | 4  | ELMOD2                 | 0.046042888 | 2.75 | 2.66  | 0.97 | 0.81 | 0.67 | 0.95 |
| cg20769275     | 16 | SEZ6L2                 | 2.47702E-14 | 2.74 | 11.20 | 4.08 | 0.84 | 0.71 | 0.97 |
| cg20152630     | 19 | MYPOP                  | 0.001366599 | 2.74 | 4.12  | 1.50 | 0.77 | 0.62 | 0.93 |
| cg15831769     | 10 | ARID5B                 | 2.40573E-38 | 2.74 | 12.71 | 4.64 | 0.82 | 0.68 | 0.96 |
| cg11326485     | 3  | CHMP2B                 | 6.40314E-13 | 2.74 | 10.38 | 3.79 | 0.76 | 0.60 | 0.92 |
| cg14160599     | 1  | PDE4DIP                | 7.17438E-11 | 2.74 | 9.16  | 3.34 | 0.82 | 0.69 | 0.96 |
| cg03906033     | 2  | SPEG                   | 3.64165E-13 | 2.73 | 10.56 | 3.86 | 0.82 | 0.69 | 0.96 |
| cg22869660     | 8  | YWHAZ                  | 0.000738791 | 2.72 | 4.37  | 1.61 | 0.87 | 0.75 | 0.99 |
| cg10513253     | 16 | SOCS1                  | 0.003256604 | 2.72 | 3.82  | 1.41 | 0.77 | 0.62 | 0.93 |
| cg22616050     | 3  | PVRL3                  | 2.86679E-40 | 2.71 | 19.89 | 7.34 | 0.79 | 0.64 | 0.94 |
| cg20964589     | 5  | HSD17B4                | 2.07308E-10 | 2.71 | 8.97  | 3.31 | 0.83 | 0.69 | 0.96 |
| cg08375775     | 4  | DDX60                  | 4.32116E-14 | 2.70 | 11.25 | 4.17 | 0.83 | 0.70 | 0.97 |
| cg21348554     | 1  | KCND3                  | 8.13375E-05 | 2.70 | 5.17  | 1.92 | 0.86 | 0.74 | 0.99 |
| cg11482571     | 20 | TFAP2C                 | 5.48872E-05 | 2.69 | 5.31  | 1.97 | 0.78 | 0.63 | 0.94 |
| cg17733353     | 9  | VAV2                   | 3.04377E-05 | 2.69 | 5.51  | 2.05 | 0.78 | 0.63 | 0.94 |
| cg19140085     | 12 | LMO3                   | 1.36312E-05 | 2.69 | 5.77  | 2.15 | 0.78 | 0.63 | 0.93 |
| cg20237291     | 3  | CCDC52                 | 9.22378E-05 | 2.68 | 5.15  | 1.92 | 0.77 | 0.61 | 0.92 |

|               |    |                 |             |      |       |       |      |      |      |
|---------------|----|-----------------|-------------|------|-------|-------|------|------|------|
| cg13429308    | 2  | CNNM3           | 0.025423255 | 2.68 | 2.99  | 1.12  | 0.76 | 0.60 | 0.92 |
| cg17088247    | 6  | ZNF165          | 0.006565124 | 2.66 | 3.60  | 1.36  | 0.83 | 0.69 | 0.97 |
| cg23769968    | 1  | HLX             | 6.82399E-05 | 2.66 | 5.30  | 1.99  | 0.76 | 0.60 | 0.92 |
| cg02115850    | 16 | CDT1            | 0.004491838 | 2.65 | 3.77  | 1.42  | 0.75 | 0.58 | 0.91 |
| ch.1.1254155F | 1  | MACF1           | 1.47475E-39 | 2.64 | 17.60 | 6.65  | 0.76 | 0.60 | 0.92 |
| cg08694555    | 3  | RAB43           | 7.35786E-08 | 2.64 | 7.48  | 2.83  | 0.82 | 0.68 | 0.96 |
| cg23615065    | 1  | SYDE2           | 5.84866E-40 | 2.63 | 19.11 | 7.25  | 0.81 | 0.66 | 0.95 |
| cg24348442    | 4  | SNHG8           | 0.010069642 | 2.63 | 3.45  | 1.31  | 0.75 | 0.59 | 0.91 |
| cg00172371    | 9  | PTRH1; TTC16    | 0.000285493 | 2.62 | 4.85  | 1.85  | 0.78 | 0.63 | 0.93 |
| cg23268892    | 14 | HSP90AA1        | 0.002160653 | 2.62 | 4.09  | 1.56  | 0.81 | 0.67 | 0.96 |
| cg00637058    | 15 | BNIP2           | 3.99301E-08 | 2.62 | 7.73  | 2.95  | 0.77 | 0.62 | 0.93 |
| cg21882527    | 3  | TOP2B           | 6.93253E-07 | 2.61 | 6.88  | 2.64  | 0.77 | 0.61 | 0.92 |
| cg01370063    | 17 | MPP2            | 0.002161828 | 2.60 | 4.12  | 1.58  | 0.77 | 0.61 | 0.92 |
| cg11752103    | 21 | DIP2A           | 0.00059118  | 2.60 | 4.63  | 1.78  | 0.83 | 0.69 | 0.96 |
| cg11746480    | 17 | SNF8            | 0.000463065 | 2.59 | 4.72  | 1.82  | 0.77 | 0.61 | 0.92 |
| cg17591341    | 17 | PSMD12          | 1.1176E-10  | 2.59 | 9.54  | 3.68  | 0.88 | 0.76 | 0.99 |
| ch.20.707667F | 20 | RBM39           | 1.77006E-38 | 2.59 | 13.69 | 5.30  | 0.77 | 0.61 | 0.92 |
| cg20187825    | 17 | PYCR1           | 9.33315E-15 | 2.58 | 12.22 | 4.73  | 0.80 | 0.65 | 0.95 |
| cg23429200    | 8  | SMIM19; SLC20A2 | 3.10198E-39 | 2.58 | 16.65 | 6.45  | 0.82 | 0.69 | 0.96 |
| cg22585957    | 12 | NECAP1          | 1.13014E-38 | 2.58 | 14.48 | 5.61  | 0.90 | 0.80 | 1.00 |
| cg17590938    | 2  | ARID5A          | 4.43702E-05 | 2.57 | 5.60  | 2.17  | 0.81 | 0.67 | 0.95 |
| cg03301945    | 19 | ILF3            | 1.95055E-06 | 2.57 | 6.64  | 2.58  | 0.78 | 0.63 | 0.94 |
| cg11996143    | 2  | RND3            | 7.77051E-14 | 2.57 | 11.66 | 4.53  | 0.83 | 0.69 | 0.96 |
| cg10800082    | 10 | PDCD4           | 5.63001E-39 | 2.57 | 15.71 | 6.12  | 0.83 | 0.70 | 0.97 |
| cg13594244    | 19 | ZNF780B         | 0.000439054 | 2.57 | 4.78  | 1.86  | 0.76 | 0.60 | 0.92 |
| cg12753450    | 11 | SC5DL           | 0.004005422 | 2.56 | 3.92  | 1.53  | 0.77 | 0.62 | 0.93 |
| cg25532409    | 19 | FBXL12          | 2.4049E-08  | 2.56 | 8.07  | 3.15  | 0.77 | 0.62 | 0.93 |
| cg19720077    | 14 | SAV1            | 0.001406488 | 2.56 | 4.35  | 1.70  | 0.89 | 0.78 | 1.00 |
| cg13849552    | 18 | SETBP1          | 1.04888E-38 | 2.56 | 14.70 | 5.75  | 0.81 | 0.66 | 0.95 |
| cg07106881    | 4  | FGFRL1          | 1.00158E-09 | 2.55 | 9.04  | 3.54  | 0.82 | 0.68 | 0.96 |
| cg25654619    | 2  | TGOLN2          | 1.08694E-07 | 2.55 | 7.62  | 2.99  | 0.89 | 0.77 | 1.00 |
| cg06498773    | 7  | TAX1BP1         | 6.2248E-10  | 2.55 | 9.21  | 3.61  | 0.76 | 0.60 | 0.92 |
| cg23508333    | 21 | RUNX1           | 0.021675464 | 2.55 | 3.19  | 1.25  | 0.81 | 0.67 | 0.96 |
| cg15492820    | 11 | SYT7            | 1.72814E-06 | 2.55 | 6.75  | 2.65  | 0.78 | 0.63 | 0.94 |
| cg18036710    | 19 | DYRK1B          | 0.000351942 | 2.54 | 4.90  | 1.93  | 0.76 | 0.60 | 0.92 |
| cg24742219    | 4  | TMEM175; GAK    | 0.039142657 | 2.54 | 2.90  | 1.14  | 0.78 | 0.63 | 0.94 |
| cg15162827    | 19 | RPL28           | 0.000865379 | 2.54 | 4.56  | 1.80  | 0.79 | 0.64 | 0.94 |
| cg16931825    | 20 | TCEA2           | 1.3591E-38  | 2.54 | 14.31 | 5.63  | 0.88 | 0.76 | 0.99 |
| cg00963305    | 16 | MMP15           | 0.000646865 | 2.54 | 4.68  | 1.84  | 0.76 | 0.60 | 0.92 |
| cg23627620    | 6  | TBPL1           | 0.0006701   | 2.53 | 4.68  | 1.85  | 0.77 | 0.61 | 0.92 |
| cg11680792    | 19 | DLL3            | 0.000745898 | 2.52 | 4.66  | 1.85  | 0.79 | 0.64 | 0.94 |
| cg26206910    | 14 | RALGAPA1        | 0.021857494 | 2.52 | 3.21  | 1.27  | 0.79 | 0.64 | 0.94 |
| cg24478660    | 14 | RGS6            | 1.48926E-41 | 2.52 | 25.37 | 10.07 | 0.86 | 0.73 | 0.98 |
| cg04737131    | 7  | HOXA2           | 5.38964E-14 | 2.51 | 12.08 | 4.81  | 0.79 | 0.64 | 0.94 |
| cg11019437    | 1  | DUSP10          | 0.002777368 | 2.51 | 4.15  | 1.66  | 0.80 | 0.65 | 0.95 |
| cg12243375    | 11 | GUCY1A2         | 0.015456481 | 2.49 | 3.40  | 1.36  | 0.75 | 0.59 | 0.91 |
| cg08313638    | 10 | DHTKD1          | 1.44405E-05 | 2.49 | 6.17  | 2.47  | 0.81 | 0.66 | 0.95 |
| cg15033181    | 2  | TRIB2           | 7.75078E-39 | 2.49 | 15.46 | 6.20  | 0.79 | 0.64 | 0.94 |
| cg07380405    | 12 | LPCAT3          | 1.95892E-11 | 2.49 | 10.47 | 4.20  | 0.80 | 0.66 | 0.95 |
| cg06965122    | 4  | GALNT7          | 0.000123444 | 2.49 | 5.40  | 2.17  | 0.76 | 0.60 | 0.92 |
| cg23309992    | 3  | ZNF445          | 2.98969E-12 | 2.49 | 11.05 | 4.45  | 0.86 | 0.73 | 0.98 |
| cg16419098    | 16 | N4BP1           | 0.000934272 | 2.49 | 4.63  | 1.86  | 0.81 | 0.67 | 0.96 |
| cg22385477    | 4  | CCDC110         | 1.53261E-14 | 2.49 | 12.62 | 5.08  | 0.93 | 0.83 | 1.00 |
| cg25922163    | 19 | GGN             | 0.000256632 | 2.48 | 5.13  | 2.07  | 0.84 | 0.71 | 0.97 |

|                |    |                 |             |      |       |       |      |      |      |
|----------------|----|-----------------|-------------|------|-------|-------|------|------|------|
| cg12511887     | 5  | CSNK1A1         | 5.15294E-06 | 2.48 | 6.55  | 2.64  | 0.83 | 0.69 | 0.96 |
| cg27065415     | 6  | VARS            | 6.30016E-09 | 2.48 | 8.75  | 3.53  | 0.76 | 0.60 | 0.92 |
| cg00074853     | 6  | CDK19; AMD1     | 1.32662E-10 | 2.47 | 9.98  | 4.03  | 0.75 | 0.59 | 0.91 |
| cg22876327     | 1  | ADIPOR1         | 0.00024136  | 2.47 | 5.18  | 2.09  | 0.87 | 0.75 | 0.99 |
| cg00134028     | 19 | WIZ             | 2.7512E-12  | 2.46 | 11.22 | 4.56  | 0.82 | 0.68 | 0.96 |
| cg05845236     | 13 | PCDH9           | 0.006511948 | 2.46 | 3.85  | 1.56  | 0.81 | 0.67 | 0.95 |
| cg03210589     | 16 | DOK4            | 2.91849E-05 | 2.46 | 6.00  | 2.44  | 0.78 | 0.62 | 0.93 |
| ch.2.4853641F  | 2  | ILKAP           | 3.4295E-10  | 2.46 | 9.77  | 3.98  | 0.80 | 0.65 | 0.95 |
| cg20815084     | 6  | BAT4; CSNK2B    | 0.014901716 | 2.45 | 3.47  | 1.42  | 0.78 | 0.63 | 0.94 |
| cg01292486     | 7  | SRI             | 0.007874023 | 2.45 | 3.77  | 1.54  | 0.76 | 0.60 | 0.92 |
| cg10038092     | 1  | AK2             | 0.02952091  | 2.45 | 3.14  | 1.28  | 0.77 | 0.62 | 0.93 |
| cg09428537     | 16 | AFG3L1; CENPBD1 | 5.14025E-05 | 2.45 | 5.82  | 2.38  | 0.90 | 0.80 | 1.00 |
| cg00908185     | 8  | SQLE            | 1.44893E-06 | 2.44 | 7.10  | 2.91  | 0.76 | 0.60 | 0.92 |
| ch.10.818442R  | 10 | ARHGAP12        | 1.49112E-09 | 2.44 | 9.39  | 3.85  | 0.81 | 0.66 | 0.95 |
| cg23753855     | 5  | MEF2C           | 1.06997E-09 | 2.44 | 9.50  | 3.90  | 0.75 | 0.59 | 0.91 |
| cg26393294     | 14 | NPAS3           | 3.64596E-12 | 2.43 | 11.31 | 4.66  | 0.79 | 0.64 | 0.94 |
| cg17780891     | 3  | IP6K2           | 8.5575E-15  | 2.43 | 13.16 | 5.42  | 0.77 | 0.62 | 0.93 |
| cg18023951     | 11 | XRRA1; SPCS2    | 8.46295E-08 | 2.43 | 8.12  | 3.34  | 0.82 | 0.68 | 0.96 |
| cg22942838     | 19 | ZBTB7A          | 0.007849015 | 2.42 | 3.81  | 1.57  | 0.75 | 0.59 | 0.91 |
| cg01906998     | 17 | ACOX1           | 0.00137692  | 2.41 | 4.60  | 1.91  | 0.81 | 0.67 | 0.96 |
| cg18567327     | 1  | MKNK1           | 0.0196843   | 2.41 | 3.39  | 1.41  | 0.75 | 0.59 | 0.91 |
| cg25547232     | 19 | CNN2            | 0.006145397 | 2.41 | 3.95  | 1.64  | 0.76 | 0.60 | 0.92 |
| cg03897712     | 7  | ELN             | 2.04858E-08 | 2.40 | 8.70  | 3.62  | 0.80 | 0.66 | 0.95 |
| cg00536383     | 2  | ASAP2           | 0.013845933 | 2.40 | 3.58  | 1.49  | 0.78 | 0.63 | 0.94 |
| ch.1.2289685F  | 1  | BTBD8           | 3.27869E-13 | 2.39 | 12.27 | 5.13  | 0.81 | 0.67 | 0.96 |
| cg22664697     | 19 | ZNF554          | 0.042250912 | 2.39 | 3.02  | 1.27  | 0.87 | 0.75 | 0.99 |
| cg08701551     | 17 | ARSG; SLC16A6   | 0.002306212 | 2.38 | 4.43  | 1.86  | 0.81 | 0.66 | 0.95 |
| cg15487992     | 19 | UBL5            | 2.89783E-05 | 2.38 | 6.20  | 2.60  | 0.76 | 0.60 | 0.92 |
| cg04691892     | 16 | VPS4A           | 4.08429E-05 | 2.38 | 6.08  | 2.55  | 0.85 | 0.72 | 0.98 |
| cg18165031     | 14 | SLC39A9; ERH    | 0.007717975 | 2.38 | 3.89  | 1.63  | 0.84 | 0.70 | 0.97 |
| cg24177604     | 4  | ANTXR2          | 7.31636E-09 | 2.38 | 9.13  | 3.84  | 0.80 | 0.66 | 0.95 |
| cg21635917     | 5  | CAST            | 0.000966398 | 2.38 | 4.81  | 2.02  | 0.85 | 0.73 | 0.98 |
| cg26617789     | 17 | NTN1            | 0.002376156 | 2.38 | 4.43  | 1.86  | 0.87 | 0.75 | 0.99 |
| cg00958884     | 17 | CYGB            | 6.03851E-10 | 2.37 | 9.98  | 4.20  | 0.79 | 0.64 | 0.94 |
| cg15932738     | 12 | PTMS            | 0.001038005 | 2.37 | 4.80  | 2.03  | 0.91 | 0.81 | 1.00 |
| cg18430990     | 1  | TMEM240         | 1.28986E-40 | 2.37 | 23.02 | 9.71  | 0.78 | 0.63 | 0.93 |
| cg26731327     | 8  | BAI1            | 4.94672E-10 | 2.37 | 10.08 | 4.26  | 0.88 | 0.76 | 0.99 |
| cg18251019     | 10 | OBFC1           | 0.002944106 | 2.37 | 4.35  | 1.84  | 0.86 | 0.74 | 0.99 |
| cg05129039     | 11 | ZNHIT2          | 0.013414094 | 2.37 | 3.64  | 1.54  | 0.76 | 0.60 | 0.92 |
| ch.15.1221715R | 15 | SIN3A           | 2.49794E-13 | 2.37 | 12.53 | 5.29  | 0.82 | 0.68 | 0.96 |
| cg00536289     | 16 | ATXN2L          | 0.018138072 | 2.36 | 3.50  | 1.48  | 0.76 | 0.60 | 0.92 |
| ch.10.2734064R | 10 | BCCIP           | 5.31106E-10 | 2.36 | 10.10 | 4.28  | 0.75 | 0.59 | 0.91 |
| cg02665463     | 17 | ARL17A          | 2.15293E-40 | 2.36 | 22.26 | 9.44  | 0.75 | 0.59 | 0.91 |
| cg23283236     | 19 | PAK4            | 0.000830483 | 2.36 | 4.92  | 2.09  | 0.78 | 0.62 | 0.93 |
| cg27607898     | 6  | PECI            | 0.007291077 | 2.35 | 3.96  | 1.68  | 0.81 | 0.67 | 0.95 |
| cg09366703     | 17 | NME2; NME1      | 0.003005376 | 2.35 | 4.37  | 1.86  | 0.76 | 0.60 | 0.92 |
| cg06983174     | 8  | XKR4            | 3.74185E-43 | 2.34 | 32.26 | 13.77 | 0.81 | 0.66 | 0.95 |
| cg01373262     | 20 | DBNDD2; SYS1    | 2.70966E-09 | 2.34 | 9.65  | 4.12  | 0.77 | 0.62 | 0.93 |
| cg09873429     | 6  | RNU6-71P        | 1.0236E-38  | 2.34 | 15.67 | 6.69  | 0.80 | 0.66 | 0.95 |
| ch.2.4958278F  | 2  | PASK            | 5.53681E-14 | 2.34 | 13.17 | 5.63  | 0.87 | 0.75 | 0.99 |
| cg06384694     | 12 | RHNO1; FOXM1    | 6.88703E-09 | 2.34 | 9.35  | 4.00  | 0.80 | 0.65 | 0.94 |
| cg21002970     | 11 | MTA2            | 0.009560505 | 2.34 | 3.85  | 1.65  | 0.76 | 0.60 | 0.92 |
| cg06316315     | 17 | RHBDL3          | 4.38119E-05 | 2.33 | 6.18  | 2.65  | 0.85 | 0.73 | 0.98 |
| cg15083233     | 9  | PALM2; AKAP2    | 9.81154E-11 | 2.33 | 10.80 | 4.63  | 0.75 | 0.59 | 0.91 |



|                |    |                    |             |      |       |       |      |      |      |
|----------------|----|--------------------|-------------|------|-------|-------|------|------|------|
| cg09221924     | 2  | ADCY3              | 0.000458251 | 2.33 | 5.23  | 2.24  | 0.77 | 0.62 | 0.93 |
| cg12339905     | 11 | FEZ1               | 0.047411698 | 2.33 | 3.02  | 1.30  | 0.84 | 0.71 | 0.97 |
| cg07827337     | 19 | PAPL               | 0.003923581 | 2.33 | 4.29  | 1.84  | 0.78 | 0.63 | 0.93 |
| cg20686479     | 11 | NAV2               | 0.000417689 | 2.31 | 5.32  | 2.30  | 0.77 | 0.61 | 0.92 |
| cg17615063     | 15 | HCN4               | 0.000301155 | 2.31 | 5.46  | 2.36  | 0.75 | 0.58 | 0.91 |
| cg13520931     | 21 | ICOSLG             | 0.012857405 | 2.30 | 3.76  | 1.63  | 0.75 | 0.59 | 0.91 |
| cg00984602     | 6  | SRF                | 1.27122E-07 | 2.30 | 8.49  | 3.69  | 0.76 | 0.60 | 0.92 |
| ch.17.1132347R | 17 | DHX8               | 2.72058E-13 | 2.30 | 12.98 | 5.64  | 0.80 | 0.65 | 0.94 |
| cg21428647     | 3  | HES1               | 3.30845E-39 | 2.30 | 17.93 | 7.80  | 0.75 | 0.59 | 0.91 |
| cg07305215     | 18 | ZFP161             | 0.01085384  | 2.30 | 3.85  | 1.68  | 0.83 | 0.69 | 0.97 |
| cg19628745     | 6  | MYLIP              | 5.25752E-07 | 2.29 | 8.01  | 3.49  | 0.76 | 0.60 | 0.92 |
| cg17650050     | 22 | HIRA; MRPL40       | 0.004235074 | 2.29 | 4.33  | 1.89  | 0.80 | 0.65 | 0.94 |
| cg17235374     | 17 | TAOK1              | 0.005580366 | 2.29 | 4.20  | 1.83  | 0.80 | 0.66 | 0.95 |
| cg07814697     | 19 | PLIN3              | 7.50183E-09 | 2.29 | 9.57  | 4.18  | 0.79 | 0.64 | 0.94 |
| cg23139473     | 8  | WRN; PURG          | 0.001796217 | 2.29 | 4.74  | 2.07  | 0.75 | 0.58 | 0.91 |
| cg27301343     | 19 | EML2               | 1.11331E-09 | 2.28 | 10.27 | 4.49  | 0.89 | 0.78 | 1.00 |
| cg06971720     | 5  | PRKAA1             | 0.0007692   | 2.28 | 5.13  | 2.25  | 0.77 | 0.62 | 0.93 |
| cg22811818     | 3  | SETD5              | 0.002545351 | 2.28 | 4.59  | 2.01  | 0.77 | 0.61 | 0.92 |
| cg00384577     | 19 | ITPKC; ADCK4       | 0.01913744  | 2.28 | 3.59  | 1.57  | 0.82 | 0.68 | 0.96 |
| cg09916698     | 1  | JMJD4; SNAP47      | 0.003107381 | 2.28 | 4.50  | 1.97  | 0.94 | 0.86 | 1.00 |
| cg07010314     | 1  | KIF21B             | 1.45034E-05 | 2.28 | 6.79  | 2.98  | 0.82 | 0.69 | 0.96 |
| cg23659592     | 1  | PEA15              | 0.006042472 | 2.27 | 4.20  | 1.85  | 0.77 | 0.62 | 0.93 |
| ch.1.893309F   | 1  | ARID1A             | 4.43629E-08 | 2.27 | 9.04  | 3.98  | 0.80 | 0.66 | 0.95 |
| cg11838640     | 15 | MAP2K5             | 2.8775E-40  | 2.27 | 22.44 | 9.89  | 0.84 | 0.70 | 0.97 |
| cg17121541     | 19 | DPF1               | 0.001350092 | 2.27 | 4.91  | 2.17  | 0.79 | 0.64 | 0.94 |
| cg04861380     | 7  | TMEM176B           | 6.98814E-06 | 2.27 | 7.13  | 3.15  | 0.77 | 0.62 | 0.93 |
| cg05770546     | 10 | ADK                | 2.32689E-41 | 2.26 | 26.76 | 11.86 | 0.78 | 0.63 | 0.93 |
| cg18086592     | 12 | HTR7P; HEBP1       | 0.006719055 | 2.26 | 4.17  | 1.85  | 0.81 | 0.66 | 0.95 |
| cg06307169     | 17 | CASC3              | 3.2043E-39  | 2.25 | 18.27 | 8.10  | 0.96 | 0.89 | 1.00 |
| cg11472541     | 17 | FDXR               | 0.000316866 | 2.25 | 5.60  | 2.49  | 0.82 | 0.68 | 0.96 |
| cg13707780     | 11 | DIXDC1             | 0.001333492 | 2.25 | 4.96  | 2.21  | 0.75 | 0.59 | 0.91 |
| cg03227078     | 19 | ZNF221             | 3.14785E-09 | 2.25 | 10.12 | 4.50  | 0.77 | 0.62 | 0.93 |
| cg21763952     | 12 | TCTN1              | 0.000145091 | 2.25 | 5.95  | 2.65  | 0.82 | 0.68 | 0.96 |
| cg19362572     | 15 | SHC4               | 4.26605E-14 | 2.24 | 14.04 | 6.26  | 0.79 | 0.64 | 0.94 |
| cg13665940     | 22 | TOP3B              | 0.011481843 | 2.24 | 3.92  | 1.75  | 0.86 | 0.74 | 0.99 |
| cg02655864     | 17 | RNMTL1; GLOD4      | 0.001807855 | 2.24 | 4.83  | 2.15  | 0.79 | 0.64 | 0.94 |
| cg23094080     | 8  | DGAT1              | 3.57616E-09 | 2.24 | 10.12 | 4.52  | 0.81 | 0.66 | 0.95 |
| cg07460449     | 16 | TSNAXIP1; RANBP10  | 6.06909E-39 | 2.24 | 17.20 | 7.69  | 0.95 | 0.88 | 1.00 |
| cg02133183     | 10 | FAM190B            | 0.007756453 | 2.23 | 4.14  | 1.85  | 0.75 | 0.59 | 0.91 |
| cg02675375     | 4  | MND1               | 0.003075303 | 2.23 | 4.61  | 2.07  | 0.75 | 0.58 | 0.91 |
| cg12758922     | 20 | RALGAPB            | 0.000183525 | 2.23 | 5.91  | 2.65  | 0.79 | 0.64 | 0.94 |
| cg15290708     | 1  | EFHD2              | 4.88927E-05 | 2.22 | 6.49  | 2.92  | 0.84 | 0.71 | 0.97 |
| cg26215887     | 10 | SLC25A28           | 2.06081E-07 | 2.22 | 8.69  | 3.91  | 0.81 | 0.67 | 0.96 |
| cg03131395     | 17 | STAT3              | 7.54003E-06 | 2.22 | 7.28  | 3.28  | 0.81 | 0.66 | 0.95 |
| cg00518698     | 21 | ITSN1; CRYZL1      | 0.000445674 | 2.22 | 5.54  | 2.50  | 0.80 | 0.66 | 0.95 |
| cg19286308     | 11 | SLC25A22; PANO1    | 0.001295784 | 2.22 | 5.05  | 2.28  | 0.79 | 0.64 | 0.94 |
| cg13727849     | 17 | MGC16275; TTYH2    | 6.51873E-05 | 2.22 | 6.39  | 2.88  | 0.75 | 0.59 | 0.91 |
| cg02582682     | 3  | RAB43; ISY1; RAB43 | 1.65709E-08 | 2.21 | 9.72  | 4.40  | 0.79 | 0.64 | 0.94 |
| cg08789220     | 11 | RTN4RL2            | 0.045553261 | 2.21 | 3.21  | 1.45  | 0.79 | 0.64 | 0.94 |
| cg25479742     | 4  | FAM198B            | 2.00133E-39 | 2.21 | 19.43 | 8.79  | 0.83 | 0.69 | 0.97 |
| cg02478448     | 13 | CCNA1              | 1.37979E-40 | 2.21 | 24.20 | 10.95 | 0.82 | 0.69 | 0.96 |
| cg21850069     | 5  | TRIM41             | 1.5294E-14  | 2.21 | 14.77 | 6.69  | 0.75 | 0.58 | 0.91 |
| cg19344263     | 19 | ZNF584             | 2.95975E-14 | 2.21 | 14.53 | 6.58  | 0.81 | 0.67 | 0.96 |
| cg16526137     | 16 | ZFP90              | 1.94037E-39 | 2.21 | 19.51 | 8.84  | 0.80 | 0.65 | 0.94 |

|                |    |                 |             |      |       |       |      |      |      |
|----------------|----|-----------------|-------------|------|-------|-------|------|------|------|
| cg13404054     | 19 | NOTCH3          | 6.86643E-08 | 2.20 | 9.24  | 4.20  | 0.80 | 0.65 | 0.95 |
| cg19595402     | 17 | SRCIN1          | 0.004816139 | 2.20 | 4.47  | 2.03  | 0.82 | 0.68 | 0.96 |
| ch.9.2473665R  | 9  | PMPCA           | 4.52705E-15 | 2.19 | 15.37 | 7.01  | 0.83 | 0.70 | 0.97 |
| cg10507402     | 2  | DPP4            | 0.004331177 | 2.19 | 4.53  | 2.07  | 0.76 | 0.60 | 0.92 |
| cg11270070     | 3  | ZMYND10         | 0.001380937 | 2.19 | 5.10  | 2.33  | 0.77 | 0.61 | 0.92 |
| cg07355392     | 6  | SEC63           | 0.00087272  | 2.19 | 5.32  | 2.43  | 0.83 | 0.69 | 0.96 |
| cg09412014     | 20 | IFT52           | 0.012690268 | 2.18 | 3.98  | 1.82  | 0.78 | 0.62 | 0.93 |
| cg16188589     | 3  | IRAK2           | 4.43335E-10 | 2.18 | 11.27 | 5.16  | 0.79 | 0.64 | 0.94 |
| cg14904433     | 1  | NUCKS1          | 1.34075E-06 | 2.18 | 8.15  | 3.73  | 0.82 | 0.67 | 0.96 |
| cg17282161     | 20 | SDC4            | 0.018969528 | 2.18 | 3.76  | 1.72  | 0.81 | 0.67 | 0.96 |
| cg03411765     | 8  | TSNARE1         | 2.93555E-40 | 2.18 | 23.12 | 10.60 | 0.81 | 0.66 | 0.95 |
| cg03382048     | 1  | PLEKHM2         | 0.0034492   | 2.18 | 4.67  | 2.14  | 0.77 | 0.61 | 0.92 |
| cg21785522     | 10 | GFRA1           | 1.90879E-39 | 2.18 | 19.75 | 9.07  | 0.80 | 0.66 | 0.95 |
| cg07600127     | 13 | KATNAL1         | 0.004425283 | 2.18 | 4.55  | 2.09  | 0.77 | 0.61 | 0.92 |
| cg18708365     | 7  | ORC5L           | 1.18147E-09 | 2.18 | 10.96 | 5.04  | 0.75 | 0.59 | 0.91 |
| ch.7.246556R   | 7  | RNF216          | 1.03627E-39 | 2.17 | 20.91 | 9.62  | 0.79 | 0.64 | 0.94 |
| cg15336627     | 9  | CDC14B          | 8.92445E-09 | 2.17 | 10.25 | 4.73  | 0.84 | 0.71 | 0.97 |
| cg24050671     | 11 | CCDC15          | 1.53291E-10 | 2.16 | 11.83 | 5.47  | 0.78 | 0.63 | 0.94 |
| cg24040576     | 1  | SMYD3           | 0.042941769 | 2.16 | 3.32  | 1.54  | 0.79 | 0.64 | 0.94 |
| cg08881202     | 14 | CCNB1IP1        | 2.41181E-09 | 2.16 | 10.81 | 5.01  | 0.77 | 0.61 | 0.92 |
| cg09615786     | 3  | DCBLD2          | 0.006376765 | 2.16 | 4.41  | 2.04  | 0.78 | 0.62 | 0.93 |
| cg19118262     | 16 | COG8; PDF       | 0.006650472 | 2.16 | 4.39  | 2.03  | 0.81 | 0.67 | 0.96 |
| cg08681365     | 8  | SPAG1           | 1.15961E-41 | 2.15 | 29.00 | 13.48 | 0.87 | 0.75 | 0.99 |
| cg25635304     | 16 | FAM65A          | 4.24629E-39 | 2.15 | 18.46 | 8.59  | 0.79 | 0.64 | 0.94 |
| ch.11.966965R  | 11 | CKAP5           | 1.96104E-08 | 2.15 | 10.04 | 4.67  | 0.76 | 0.60 | 0.92 |
| cg11078175     | 7  | ACTR3B          | 0.002220309 | 2.15 | 4.98  | 2.32  | 0.78 | 0.63 | 0.93 |
| cg00179014     | 9  | RALGPS1         | 0.002404786 | 2.15 | 4.94  | 2.30  | 0.91 | 0.80 | 1.00 |
| ch.20.221631R  | 20 | ANKRD5          | 1.10744E-11 | 2.15 | 12.96 | 6.03  | 0.82 | 0.68 | 0.96 |
| cg13173564     | 19 | MPND            | 3.61138E-07 | 2.15 | 8.88  | 4.14  | 0.81 | 0.66 | 0.95 |
| cg26838212     | 10 | BMS1            | 0.007461115 | 2.14 | 4.37  | 2.04  | 0.78 | 0.62 | 0.93 |
| cg16570157     | 11 | EFCAB4A         | 0.003307074 | 2.14 | 4.81  | 2.25  | 0.75 | 0.58 | 0.91 |
| cg25518707     | 17 | MARCH10;        | 1.01427E-10 | 2.14 | 12.21 | 5.72  | 0.78 | 0.63 | 0.94 |
| cg25890275     | 11 | VPS37C          | 0.006715621 | 2.13 | 4.44  | 2.08  | 0.76 | 0.60 | 0.92 |
| cg24188415     | 10 | EMX2            | 0.014312987 | 2.13 | 4.03  | 1.89  | 0.86 | 0.73 | 0.98 |
| cg16123774     | 13 | NEK3            | 0.010522312 | 2.13 | 4.20  | 1.97  | 0.77 | 0.61 | 0.92 |
| cg21816532     | 17 | HOXB6           | 2.20728E-08 | 2.13 | 10.15 | 4.77  | 0.89 | 0.78 | 1.00 |
| cg24737639     | 12 | NUP37           | 0.022361072 | 2.12 | 3.78  | 1.78  | 0.76 | 0.60 | 0.92 |
| cg11251319     | 19 | ATP8B3          | 1.30096E-07 | 2.12 | 9.45  | 4.45  | 0.76 | 0.60 | 0.92 |
| cg03328060     | 17 | ZNF624          | 0.040104892 | 2.12 | 3.44  | 1.62  | 0.76 | 0.60 | 0.92 |
| cg27204163     | 3  | EIF2B5          | 5.39595E-06 | 2.12 | 7.88  | 3.72  | 0.76 | 0.60 | 0.92 |
| cg14446015     | 8  | ZNF395          | 0.034445518 | 2.12 | 3.54  | 1.67  | 0.79 | 0.63 | 0.94 |
| cg12070221     | 10 | ANK3            | 4.34969E-10 | 2.12 | 11.82 | 5.58  | 0.78 | 0.62 | 0.93 |
| cg06022942     | 10 | FLJ45983; GATA3 | 1.04917E-05 | 2.12 | 7.61  | 3.59  | 0.76 | 0.60 | 0.92 |
| cg15972331     | 13 | FGF14           | 7.58769E-09 | 2.12 | 10.67 | 5.05  | 0.79 | 0.64 | 0.94 |
| ch.22.363412F  | 22 | AP1B1           | 8.9185E-15  | 2.11 | 16.06 | 7.61  | 0.81 | 0.66 | 0.95 |
| ch.19.332523F  | 19 | GTF2F1          | 5.99105E-09 | 2.11 | 10.82 | 5.13  | 0.75 | 0.59 | 0.91 |
| cg02720697     | 19 | NFIC            | 6.22587E-39 | 2.11 | 18.04 | 8.56  | 0.87 | 0.75 | 0.99 |
| cg12784766     | 17 | CYTH1           | 0.029587775 | 2.11 | 3.65  | 1.74  | 0.78 | 0.62 | 0.93 |
| ch.17.1364760R | 17 | CA10            | 8.12394E-07 | 2.11 | 8.79  | 4.17  | 0.75 | 0.59 | 0.91 |
| cg16256643     | 19 | NDUFB7          | 6.39116E-15 | 2.10 | 16.32 | 7.76  | 0.81 | 0.67 | 0.95 |
| cg08101646     | 18 | SLC14A2         | 6.89702E-06 | 2.10 | 7.86  | 3.74  | 0.83 | 0.69 | 0.97 |
| cg16803522     | 15 | RASGRP1         | 0.043309519 | 2.10 | 3.42  | 1.63  | 0.81 | 0.66 | 0.95 |
| cg07001901     | 16 | PLCG2           | 1.02886E-08 | 2.10 | 10.66 | 5.07  | 0.82 | 0.68 | 0.96 |
| cg11146173     | 14 | MTA1            | 0.017187648 | 2.10 | 3.99  | 1.90  | 0.75 | 0.58 | 0.91 |

|            |    |                                   |             |      |       |       |      |      |      |
|------------|----|-----------------------------------|-------------|------|-------|-------|------|------|------|
| cg09781054 | 20 | ZSWIM1                            | 1.10315E-07 | 2.10 | 9.69  | 4.62  | 0.84 | 0.70 | 0.97 |
| cg15321195 | 21 | AGPAT3                            | 1.56039E-09 | 2.10 | 11.47 | 5.47  | 0.76 | 0.60 | 0.92 |
| cg05157140 | 7  | UNCX                              | 7.44484E-05 | 2.10 | 6.81  | 3.25  | 0.79 | 0.64 | 0.94 |
| cg22800477 | 1  | CASZ1                             | 1.67579E-39 | 2.10 | 20.69 | 9.88  | 0.84 | 0.70 | 0.97 |
| cg15926590 | 6  | PSMB9; TAP1                       | 0.003337545 | 2.09 | 4.92  | 2.35  | 0.82 | 0.68 | 0.96 |
| cg05175333 | 18 | ROCK1                             | 0.009285024 | 2.09 | 4.37  | 2.09  | 0.75 | 0.59 | 0.91 |
| cg14159220 | 17 | SEC14L1                           | 4.90079E-08 | 2.09 | 10.09 | 4.83  | 0.78 | 0.62 | 0.93 |
| cg20719524 | 15 | RPP25                             | 9.71672E-39 | 2.08 | 17.35 | 8.32  | 0.84 | 0.70 | 0.97 |
| cg03556069 | 2  | TMEM163                           | 0.006211594 | 2.08 | 4.61  | 2.21  | 0.76 | 0.60 | 0.92 |
| cg10840007 | 14 | CDCA4                             | 0.000299738 | 2.08 | 6.22  | 3.00  | 0.75 | 0.59 | 0.91 |
| cg16546279 | 17 | ATXN7L3                           | 4.01087E-08 | 2.07 | 10.31 | 4.97  | 0.75 | 0.59 | 0.91 |
| cg18548208 | 14 | EML5                              | 4.41085E-06 | 2.07 | 8.23  | 3.97  | 0.79 | 0.64 | 0.94 |
| cg11927881 | 11 | ELMOD1                            | 1.0678E-12  | 2.07 | 14.73 | 7.12  | 0.92 | 0.82 | 1.00 |
| cg19983274 | 19 | LPHN1                             | 0.002520816 | 2.07 | 5.16  | 2.50  | 0.84 | 0.71 | 0.97 |
| cg14496450 | 17 | HRNBP3                            | 0.006006844 | 2.05 | 4.72  | 2.30  | 0.76 | 0.60 | 0.92 |
| cg09418984 | 19 | MYADM                             | 4.37873E-05 | 2.05 | 7.29  | 3.56  | 0.81 | 0.67 | 0.95 |
| cg08723176 | 12 | PXN                               | 0.011706612 | 2.05 | 4.35  | 2.12  | 0.77 | 0.61 | 0.92 |
| cg20755163 | 1  | KIAA2013                          | 0.005270969 | 2.05 | 4.82  | 2.35  | 0.76 | 0.60 | 0.92 |
| cg13703070 | 9  | NR4A3                             | 5.77783E-06 | 2.04 | 8.28  | 4.05  | 0.81 | 0.66 | 0.95 |
| cg21533369 | 22 | SFI1                              | 0.042232572 | 2.04 | 3.56  | 1.74  | 0.82 | 0.68 | 0.96 |
| cg07860213 | 8  | PRDM14                            | 0.026015058 | 2.04 | 3.88  | 1.90  | 0.79 | 0.64 | 0.94 |
| cg27234067 | 11 | WIT1                              | 0.001151327 | 2.04 | 5.67  | 2.78  | 0.78 | 0.62 | 0.93 |
| cg17030173 | 5  | MARCH11                           | 4.93414E-42 | 2.03 | 32.05 | 15.77 | 0.90 | 0.80 | 1.00 |
| cg23118464 | 2  | AFF3                              | 0.038656325 | 2.03 | 3.64  | 1.79  | 0.80 | 0.65 | 0.94 |
| cg13219446 | 1  | DCAF8                             | 2.69496E-06 | 2.03 | 8.73  | 4.30  | 0.76 | 0.60 | 0.92 |
| cg10175688 | 17 | TXNDC17; KIAA0753                 | 0.000150357 | 2.03 | 6.78  | 3.34  | 0.80 | 0.65 | 0.95 |
| cg23690809 | 1  | PPP1R12B                          | 4.88534E-11 | 2.03 | 13.60 | 6.70  | 0.88 | 0.77 | 1.00 |
| cg19564098 | 10 | HMX3                              | 0.042516073 | 2.03 | 3.59  | 1.77  | 0.75 | 0.58 | 0.91 |
| cg05279413 | 7  | MAFK                              | 2.94847E-09 | 2.02 | 11.89 | 5.88  | 0.78 | 0.62 | 0.93 |
| cg11097433 | 10 | SORCS1                            | 0.000777344 | 2.02 | 5.97  | 2.96  | 0.75 | 0.59 | 0.91 |
| cg06463759 | 7  | ATP6V1F                           | 2.15759E-39 | 2.02 | 20.94 | 10.38 | 0.81 | 0.66 | 0.95 |
| cg21392576 | 2  | NFE2L2                            | 1.92969E-14 | 2.01 | 17.08 | 8.48  | 0.76 | 0.60 | 0.92 |
| cg04588455 | 16 | MAZ                               | 0.010956968 | 2.01 | 4.49  | 2.23  | 0.75 | 0.58 | 0.91 |
| cg18221121 | 10 | WDR37                             | 2.12167E-06 | 2.01 | 8.98  | 4.47  | 0.75 | 0.59 | 0.91 |
| cg26933691 | 19 | COX6B1                            | 0.001201431 | 2.01 | 5.79  | 2.88  | 0.86 | 0.73 | 0.98 |
| cg09806934 | 11 | CPT1A                             | 1.40184E-05 | 2.00 | 8.10  | 4.04  | 0.87 | 0.75 | 0.99 |
| cg02009141 | 1  | UBE2T                             | 3.24733E-05 | 2.00 | 7.69  | 3.84  | 0.75 | 0.59 | 0.91 |
| cg13583085 | 5  | UBE2B                             | 5.44323E-07 | 2.00 | 9.69  | 4.84  | 0.79 | 0.64 | 0.94 |
| cg24606935 | 20 | HCK                               | 1.68923E-10 | 4.62 | 6.44  | 1.39  | 0.76 | 0.60 | 0.92 |
| cg09390251 | 17 | RABEP1                            | 0.001730446 | 4.21 | 3.19  | 0.76  | 0.76 | 0.60 | 0.92 |
| cg20337934 | 2  | SNRNP27                           | 2.16937E-07 | 3.81 | 5.56  | 1.46  | 0.75 | 0.59 | 0.91 |
| cg11081723 | 20 | PANK2                             | 0.001245853 | 3.50 | 3.57  | 1.02  | 0.75 | 0.58 | 0.91 |
| cg12035585 | 17 | FAM134C; TUBG1                    | 0.02725959  | 3.03 | 2.73  | 0.90  | 0.80 | 0.65 | 0.94 |
| cg01157809 | 2  | AGBL5                             | 0.011036615 | 2.83 | 3.23  | 1.14  | 0.75 | 0.59 | 0.91 |
| cg24984691 | 1  | POLR3C; RNF115;<br>NBPF20; NBPF10 | 0.022315865 | 2.57 | 3.15  | 1.23  | 0.81 | 0.66 | 0.95 |
| cg01045337 | 16 | AXIN1                             | 4.08703E-05 | 2.53 | 5.71  | 2.26  | 0.78 | 0.63 | 0.94 |
| cg03212129 | 19 | PDCD2L                            | 0.045681852 | 2.30 | 3.08  | 1.34  | 0.90 | 0.79 | 1.00 |
| cg23669159 | 1  | PLEKH01                           | 9.57119E-10 | 2.26 | 10.49 | 4.65  | 0.81 | 0.66 | 0.95 |
| cg09936907 | 12 | USP5; CDCA3                       | 0.037224524 | 2.01 | 3.72  | 1.85  | 0.81 | 0.67 | 0.95 |
| cg00949022 | 13 | PIBF1; DIS3                       | 0.000701884 | 2.16 | 5.50  | 2.54  | 0.76 | 0.60 | 0.92 |
| cg05789608 | 1  | DSTYK                             | 0.001976424 | 3.13 | 3.65  | 1.17  | 0.77 | 0.61 | 0.92 |
| cg07130520 | 1  | DDAH1                             | 0.006651328 | 2.19 | 4.31  | 1.97  | 0.84 | 0.70 | 0.97 |
| cg03369465 | 6  | DAXX                              | 2.37687E-08 | 3.01 | 7.00  | 2.33  | 0.80 | 0.66 | 0.95 |

|            |    |                   |             |      |       |       |      |      |      |
|------------|----|-------------------|-------------|------|-------|-------|------|------|------|
| cg19565306 | 22 | RPL23AP82; RABL2B | 0.000488579 | 2.48 | 4.89  | 1.97  | 0.76 | 0.60 | 0.92 |
| cg05898482 | 7  | XRCC2             | 2.74809E-44 | 2.41 | 35.28 | 14.67 | 0.87 | 0.75 | 0.99 |
| cg13620370 | 5  | PDLIM7            | 0.016110285 | 2.39 | 3.51  | 1.47  | 0.75 | 0.59 | 0.91 |
| cg20552696 | 5  | MED7              | 0.027091568 | 2.43 | 3.21  | 1.32  | 0.77 | 0.61 | 0.92 |
| cg13432900 | 19 | RPS11             | 0.001557325 | 2.60 | 4.25  | 1.64  | 0.79 | 0.64 | 0.94 |
| cg19823793 | 3  | SGOL1             | 1.17112E-12 | 3.76 | 8.08  | 2.15  | 0.81 | 0.66 | 0.95 |
| cg08427575 | 7  | YWHAG             | 1.21022E-12 | 4.19 | 7.62  | 1.82  | 0.81 | 0.67 | 0.95 |
| cg07737564 | 19 | ZNF223            | 0.042669131 | 2.31 | 3.10  | 1.34  | 0.76 | 0.60 | 0.92 |
| cg24333469 | 22 | SLC7A4            | 5.61729E-06 | 2.76 | 5.92  | 2.14  | 0.84 | 0.71 | 0.97 |
| cg03909712 | 6  | AKD1; FIG4        | 6.95393E-06 | 2.05 | 8.13  | 3.96  | 0.80 | 0.65 | 0.94 |
| cg09997463 | 12 | CNOT2             | 3.04518E-15 | 2.76 | 11.76 | 4.26  | 0.86 | 0.73 | 0.98 |
| cg17500645 | 3  | LZTFL1            | 0.009249343 | 2.58 | 3.54  | 1.37  | 0.76 | 0.60 | 0.92 |
| cg23209098 | 14 | CYP46A1           | 2.69122E-38 | 3.72 | 10.88 | 2.93  | 0.82 | 0.68 | 0.96 |
| cg03469617 | 2  | MRPL53            | 4.45198E-06 | 3.92 | 4.81  | 1.23  | 0.83 | 0.69 | 0.96 |
| cg16781205 | 14 | DIO3              | 1.15541E-11 | 3.71 | 7.69  | 2.07  | 0.77 | 0.61 | 0.92 |
| cg21861662 | 9  | FANCC             | 0.001838807 | 3.10 | 3.69  | 1.19  | 0.80 | 0.65 | 0.95 |
| cg06077359 | 9  | DNAJC25; GNG10    | 0.018660112 | 2.92 | 2.95  | 1.01  | 0.79 | 0.64 | 0.94 |
| cg09484638 | 19 | DNASE2            | 0.000288285 | 2.88 | 4.51  | 1.57  | 0.80 | 0.65 | 0.95 |
| cg20525831 | 1  | ANKRD35; NBPF20   | 0.011957887 | 2.67 | 3.34  | 1.25  | 0.78 | 0.63 | 0.93 |
| cg25979598 | 1  | RTCD1             | 2.62911E-41 | 2.60 | 24.01 | 9.23  | 0.85 | 0.71 | 0.98 |
| cg02573825 | 19 | ZNF350            | 2.22266E-10 | 2.43 | 10.04 | 4.14  | 0.76 | 0.60 | 0.92 |
| cg13359134 | 18 | RTTN              | 0.006872013 | 2.39 | 3.92  | 1.64  | 0.75 | 0.59 | 0.91 |
| cg16750717 | 1  | SSX2IP            | 0.006431831 | 2.29 | 4.13  | 1.80  | 0.76 | 0.60 | 0.92 |
| cg19706449 | 1  | ATPAF1            | 1.07349E-07 | 2.26 | 8.73  | 3.85  | 0.82 | 0.68 | 0.96 |
| cg13109300 | 12 | DHH               | 0.000127221 | 2.26 | 5.98  | 2.65  | 0.81 | 0.66 | 0.95 |
| cg10014408 | 9  | SDCCAG3; PMPCA    | 0.044983242 | 2.10 | 3.40  | 1.62  | 0.88 | 0.76 | 0.99 |
| cg05853013 | 6  | VAR52             | 0.010038354 | 2.01 | 4.54  | 2.26  | 0.80 | 0.65 | 0.95 |
| cg25674826 | 21 | MRPS6; SLC5A3     | 7.12342E-10 | 2.07 | 12.03 | 5.81  | 0.85 | 0.72 | 0.98 |
| cg21270074 | 20 | BCAS4             | 1.05974E-09 | 2.61 | 8.83  | 3.38  | 0.78 | 0.63 | 0.94 |
| cg10255675 | 14 | HNRNPC            | 2.89993E-07 | 2.50 | 7.47  | 2.99  | 0.76 | 0.60 | 0.92 |
| cg17074213 | 1  | TGFBR3            | 3.47752E-43 | 2.15 | 34.62 | 16.07 | 0.83 | 0.69 | 0.96 |
| cg09367529 | 20 | TMEM230           | 0.025103638 | 2.76 | 2.94  | 1.07  | 0.88 | 0.76 | 0.99 |
| cg03212862 | 20 | CSE1L             | 0.007470744 | 2.31 | 4.02  | 1.74  | 0.80 | 0.65 | 0.94 |
| cg08188860 | 9  | PPP6C             | 1.88837E-12 | 4.17 | 7.56  | 1.82  | 0.76 | 0.60 | 0.92 |
| cg19597529 | 3  | PARP14            | 4.53003E-39 | 2.09 | 18.81 | 9.00  | 0.75 | 0.59 | 0.91 |
| cg18070621 | 17 | PCYT2             | 0.000962465 | 2.85 | 4.13  | 1.45  | 0.88 | 0.76 | 1.00 |
| cg12315363 | 17 | TAF15             | 2.43805E-06 | 3.16 | 5.59  | 1.77  | 0.78 | 0.62 | 0.93 |
| cg00045303 | 21 | SETD4             | 0.005483618 | 2.39 | 4.04  | 1.69  | 0.78 | 0.63 | 0.93 |
| cg18412834 | 20 | FLJ16779; NKAIN4  | 0.030208238 | 2.35 | 3.24  | 1.38  | 0.79 | 0.64 | 0.94 |
| cg09724301 | 2  | GAD1              | 0.000108687 | 2.18 | 6.31  | 2.90  | 0.81 | 0.67 | 0.96 |
| cg00440776 | 15 | SPRED1            | 0.009362296 | 4.40 | 2.64  | 0.60  | 0.76 | 0.60 | 0.92 |
| cg04842828 | 21 | IFNAR1            | 3.53897E-11 | 4.40 | 6.86  | 1.56  | 0.83 | 0.70 | 0.97 |
| cg16399182 | 6  | COQ3              | 1.11733E-37 | 5.41 | 7.87  | 1.45  | 0.90 | 0.80 | 1.00 |
| cg18555073 | 15 | B2M               | 1.39767E-06 | 2.10 | 8.56  | 4.07  | 0.77 | 0.61 | 0.92 |
| cg07212963 | 1  | HMGCL             | 3.39862E-14 | 4.62 | 7.88  | 1.70  | 0.79 | 0.64 | 0.94 |
| cg25544073 | 8  | MTDH              | 5.01675E-38 | 3.61 | 10.07 | 2.79  | 0.78 | 0.63 | 0.94 |
| cg05134500 | 3  | MFI2              | 2.51962E-38 | 3.33 | 11.47 | 3.45  | 0.85 | 0.71 | 0.98 |
| cg26463106 | 3  | THUMP3            | 3.51056E-05 | 3.27 | 4.75  | 1.45  | 0.81 | 0.66 | 0.95 |
| cg24454219 | 4  | ZNF721; PIGG      | 3.28244E-06 | 3.10 | 5.58  | 1.80  | 0.85 | 0.72 | 0.98 |
| cg08052226 | 19 | NFIX              | 1.06633E-14 | 2.92 | 10.81 | 3.71  | 0.78 | 0.63 | 0.93 |
| cg13370420 | 19 | DACT3             | 0.000945816 | 2.82 | 4.16  | 1.48  | 0.77 | 0.62 | 0.93 |
| cg26791126 | 1  | DNAJC8            | 0.000690045 | 2.57 | 4.61  | 1.79  | 0.87 | 0.75 | 0.99 |
| cg00505936 | 16 | HAS3              | 1.33689E-09 | 2.41 | 9.54  | 3.95  | 0.79 | 0.64 | 0.94 |
| cg21702506 | 12 | SLC6A15           | 3.73513E-41 | 2.18 | 26.73 | 12.27 | 0.86 | 0.74 | 0.99 |

|            |    |                |             |      |       |       |      |      |      |
|------------|----|----------------|-------------|------|-------|-------|------|------|------|
| cg13607699 | 17 | UBTF           | 1.18121E-38 | 2.17 | 16.37 | 7.55  | 0.75 | 0.59 | 0.91 |
| cg24397040 | 21 | PDXK           | 0.003895245 | 2.17 | 4.65  | 2.14  | 0.86 | 0.74 | 0.99 |
| cg10754596 | 22 | OSBP2          | 0.007695377 | 2.08 | 4.51  | 2.17  | 0.81 | 0.66 | 0.95 |
| cg12876333 | 18 | NEDD4L         | 0.001415955 | 2.07 | 5.46  | 2.64  | 0.79 | 0.64 | 0.94 |
| cg22501899 | 17 | AARSD1; RUNDC1 | 0.043229275 | 2.00 | 3.63  | 1.81  | 0.75 | 0.58 | 0.91 |
| cg25026401 | 12 | SLC15A4        | 1.23732E-40 | 2.26 | 23.97 | 10.62 | 0.82 | 0.69 | 0.96 |
| cg19464917 | 15 | ISL2           | 7.34034E-43 | 2.92 | 27.28 | 9.36  | 0.82 | 0.69 | 0.96 |
| cg16880783 | 19 | TRMT1          | 2.02122E-42 | 2.12 | 32.26 | 15.20 | 0.84 | 0.71 | 0.97 |
| cg05205152 | 19 | AKAP8L         | 0.009049844 | 2.92 | 3.24  | 1.11  | 0.91 | 0.81 | 1.00 |
| cg14077010 | 11 | NARS2          | 0.000865351 | 2.79 | 4.23  | 1.51  | 0.78 | 0.63 | 0.94 |
| cg23235362 | 15 | TSPAN3         | 2.31859E-05 | 3.74 | 4.52  | 1.21  | 0.75 | 0.59 | 0.91 |
| cg18269503 | 6  | HIST1H4C       | 7.87273E-07 | 2.91 | 6.24  | 2.15  | 0.77 | 0.62 | 0.93 |
| cg23672480 | 12 | APAF1; IKBIP   | 1.50141E-07 | 2.43 | 7.91  | 3.25  | 0.79 | 0.64 | 0.94 |
| cg22576055 | 19 | MORG1; MAN2B1  | 1.82163E-38 | 4.35 | 10.87 | 2.50  | 0.76 | 0.60 | 0.92 |
| cg09881384 | 11 | USP28          | 1.42228E-38 | 4.06 | 11.45 | 2.82  | 0.85 | 0.72 | 0.98 |
| cg05856122 | 11 | TAF10          | 4.5311E-15  | 4.68 | 8.12  | 1.74  | 0.82 | 0.68 | 0.96 |
| cg27586068 | 19 | DOHH           | 0.000875871 | 2.80 | 4.21  | 1.50  | 0.85 | 0.73 | 0.98 |
| cg00807892 | 4  | MOBK1A         | 2.77503E-05 | 2.18 | 6.88  | 3.15  | 0.76 | 0.60 | 0.92 |
| cg06995575 | 2  | DPY30          | 0.01997031  | 2.09 | 3.93  | 1.88  | 0.88 | 0.76 | 0.99 |
| cg09162102 | 12 | TMPO           | 2.03525E-12 | 2.35 | 11.98 | 5.10  | 0.79 | 0.64 | 0.94 |
| cg02417622 | 15 | NUSAP1; OIP5   | 0.005079486 | 2.05 | 4.82  | 2.35  | 0.81 | 0.66 | 0.95 |
| cg16793043 | 3  | SNRK           | 2.0503E-39  | 4.08 | 14.06 | 3.45  | 0.84 | 0.71 | 0.97 |
| cg18464001 | 18 | KDSR           | 2.99505E-07 | 2.95 | 6.45  | 2.19  | 0.81 | 0.66 | 0.95 |
| cg22517622 | 3  | SGOL1          | 5.15099E-13 | 4.81 | 7.31  | 1.52  | 0.78 | 0.63 | 0.93 |
| cg19478426 | 16 | KLHDC4         | 4.74712E-39 | 4.05 | 12.97 | 3.20  | 0.82 | 0.69 | 0.96 |
| cg07596209 | 1  | PRDM2          | 0.001640107 | 2.84 | 3.95  | 1.39  | 0.81 | 0.66 | 0.95 |
| cg27400713 | 9  | CHMP5; BAG1    | 0.001060275 | 2.16 | 5.30  | 2.45  | 0.87 | 0.75 | 0.99 |
| cg23056966 | 15 | HDCC3; UNC45A  | 0.000153801 | 2.07 | 6.57  | 3.17  | 0.78 | 0.63 | 0.93 |
| cg08484665 | 2  | PCBP1          | 2.16709E-09 | 3.63 | 6.71  | 1.85  | 0.79 | 0.64 | 0.94 |
| cg08535148 | 4  | RBPJ           | 0.008342308 | 2.24 | 4.09  | 1.83  | 0.76 | 0.60 | 0.92 |
| cg05608389 | 1  | PDE4B          | 7.32323E-11 | 2.20 | 11.83 | 5.38  | 0.77 | 0.61 | 0.92 |
| cg05349922 | 6  | RWDD1          | 4.63776E-09 | 3.61 | 6.57  | 1.82  | 0.77 | 0.61 | 0.92 |
| cg13126121 | 8  | FLJ10661       | 0.044079108 | 2.10 | 3.41  | 1.62  | 0.76 | 0.60 | 0.92 |
| cg14661464 | 2  | TXNDC9; EIF5B  | 0.024215066 | 3.94 | 2.43  | 0.62  | 0.85 | 0.73 | 0.98 |
| cg05775895 | 3  | CAND2          | 0.003243623 | 2.80 | 3.74  | 1.34  | 0.79 | 0.64 | 0.94 |
| cg21542780 | 2  | HJURP          | 3.27212E-08 | 2.43 | 8.43  | 3.47  | 0.85 | 0.72 | 0.98 |
| cg06383088 | 9  | XPA            | 0.004984235 | 3.14 | 3.32  | 1.06  | 0.79 | 0.63 | 0.94 |
| cg17054969 | 12 | COL2A1         | 0.032613588 | 2.38 | 3.17  | 1.33  | 0.79 | 0.64 | 0.94 |
| cg10929629 | 13 | RNF219         | 7.13238E-14 | 3.54 | 8.94  | 2.53  | 0.79 | 0.64 | 0.94 |
| cg03467424 | 10 | EPC1           | 0.026469576 | 3.09 | 2.70  | 0.87  | 0.80 | 0.66 | 0.95 |
| cg26485563 | 12 | ANKRD52        | 6.66328E-38 | 5.57 | 8.51  | 1.53  | 0.75 | 0.59 | 0.91 |
| cg10476512 | 19 | IGLON5         | 7.13608E-11 | 3.33 | 7.83  | 2.35  | 0.76 | 0.60 | 0.92 |
| cg21777986 | 18 | BCL2           | 9.19628E-08 | 2.42 | 8.10  | 3.34  | 0.89 | 0.78 | 1.00 |
| cg03056863 | 14 | RABGGTA        | 0.000139608 | 2.35 | 5.66  | 2.41  | 0.75 | 0.58 | 0.91 |
| cg03761649 | 12 | RIMKLB         | 0.008604579 | 2.27 | 4.03  | 1.78  | 0.78 | 0.62 | 0.93 |
| cg01576519 | 19 | ILVBL          | 1.6816E-39  | 2.22 | 19.70 | 8.89  | 0.76 | 0.60 | 0.92 |
| cg14002175 | 1  | BCL9           | 5.0811E-09  | 2.10 | 10.93 | 5.19  | 0.82 | 0.68 | 0.96 |
| cg08440521 | 4  | RNF150         | 1.30209E-05 | 2.03 | 7.97  | 3.92  | 0.80 | 0.66 | 0.95 |
| cg24111008 | 19 | PNPLA6         | 5.52678E-05 | 2.87 | 5.05  | 1.76  | 0.83 | 0.69 | 0.96 |
| cg01416537 | 4  | NDST3          | 3.82677E-12 | 2.53 | 10.76 | 4.25  | 0.82 | 0.69 | 0.96 |
| cg20146868 | 19 | GRWD1          | 7.41274E-13 | 2.44 | 11.72 | 4.80  | 0.81 | 0.66 | 0.95 |
| cg23598562 | 12 | SP1            | 8.73255E-07 | 2.28 | 7.88  | 3.46  | 0.75 | 0.58 | 0.91 |
| cg07840972 | 7  | TMED4          | 3.30463E-05 | 3.94 | 4.32  | 1.10  | 0.81 | 0.67 | 0.96 |
| cg25028996 | 14 | PRMT5          | 0.013504372 | 2.15 | 4.02  | 1.87  | 0.75 | 0.59 | 0.91 |

|            |    |                                                |             |      |       |      |      |      |      |
|------------|----|------------------------------------------------|-------------|------|-------|------|------|------|------|
| cg05895714 | 17 | RPL23                                          | 5.80792E-38 | 3.89 | 9.59  | 2.46 | 0.88 | 0.76 | 0.99 |
| cg08884368 | 17 | NME2; NME1                                     | 0.014016004 | 2.49 | 3.45  | 1.39 | 0.81 | 0.67 | 0.96 |
| cg12497026 | 1  | HSPB11; LRRC42                                 | 4.61387E-07 | 2.54 | 7.21  | 2.84 | 0.80 | 0.65 | 0.95 |
| cg01943657 | 4  | PPP3CA                                         | 0.049288743 | 2.08 | 3.38  | 1.63 | 0.86 | 0.73 | 0.98 |
| cg11387577 | 6  | SHPRH                                          | 6.68154E-38 | 3.99 | 9.31  | 2.34 | 0.78 | 0.63 | 0.93 |
| cg13832679 | 9  | CTNNAL1                                        | 2.6682E-38  | 3.19 | 11.61 | 3.64 | 0.80 | 0.65 | 0.95 |
| cg07235453 | 8  | TAF2                                           | 1.22613E-12 | 3.67 | 8.18  | 2.23 | 0.78 | 0.63 | 0.94 |
| cg00609363 | 6  | ZNRD1                                          | 3.83507E-38 | 7.95 | 8.67  | 1.09 | 0.75 | 0.59 | 0.91 |
| cg14207210 | 17 | PPM1E                                          | 5.07356E-05 | 2.40 | 5.95  | 2.48 | 0.88 | 0.77 | 1.00 |
| cg05202407 | 17 | TOP3A; SMCR8                                   | 1.03628E-05 | 2.57 | 6.09  | 2.37 | 0.75 | 0.59 | 0.91 |
| cg15403346 | 6  | TAPBP; RGL2                                    | 1.83127E-05 | 3.35 | 4.86  | 1.45 | 0.85 | 0.73 | 0.98 |
| cg08886844 | 19 | CD320                                          | 0.00110308  | 2.07 | 5.59  | 2.70 | 0.76 | 0.60 | 0.92 |
| cg07296918 | 1  | B4GALT2                                        | 0.010882723 | 2.81 | 3.25  | 1.16 | 0.83 | 0.69 | 0.97 |
| cg17717362 | 16 | HSDL1; DNAAF1                                  | 0.000479313 | 3.60 | 3.79  | 1.05 | 0.85 | 0.71 | 0.98 |
| cg02117197 | 16 | CENPT; NUTF2                                   | 9.83045E-08 | 3.42 | 6.09  | 1.78 | 0.81 | 0.66 | 0.95 |
| cg04099673 | 18 | WDR7                                           | 1.19634E-08 | 3.13 | 6.97  | 2.23 | 0.79 | 0.64 | 0.94 |
| cg00905725 | 1  | DFFB; KIAA0562                                 | 0.005086477 | 3.12 | 3.32  | 1.06 | 0.75 | 0.58 | 0.91 |
| cg02480104 | 20 | RPN2                                           | 0.001385512 | 2.97 | 3.89  | 1.31 | 0.78 | 0.63 | 0.94 |
| cg15196314 | 19 | CTU1                                           | 2.05218E-06 | 2.94 | 5.92  | 2.01 | 0.76 | 0.60 | 0.92 |
| cg16930275 | 19 | TRIP10                                         | 0.000101769 | 2.68 | 5.13  | 1.91 | 0.80 | 0.65 | 0.95 |
| cg05003157 | 1  | ZBTB41; CRB1                                   | 2.07652E-40 | 2.53 | 21.24 | 8.38 | 0.75 | 0.59 | 0.91 |
| cg02824295 | 19 | TBC1D17; AKT1S1                                | 0.001498652 | 2.45 | 4.49  | 1.83 | 0.78 | 0.62 | 0.93 |
| cg22931738 | 3  | GATA2                                          | 4.9351E-12  | 2.41 | 11.33 | 4.71 | 0.77 | 0.61 | 0.92 |
| cg07329149 | 2  | NDUFB3; FAM126B                                | 1.18304E-05 | 2.14 | 7.42  | 3.46 | 0.83 | 0.69 | 0.96 |
| cg07707379 | 16 | CYB5B                                          | 5.92821E-10 | 2.01 | 12.76 | 6.36 | 0.79 | 0.64 | 0.94 |
| cg07811750 | 17 | CAMTA2                                         | 0.001152391 | 2.71 | 4.22  | 1.56 | 0.75 | 0.59 | 0.91 |
| cg27265032 | 16 | CP110                                          | 1.51789E-09 | 2.07 | 11.76 | 5.69 | 0.85 | 0.72 | 0.98 |
| cg03537301 | 5  | MIER3                                          | 1.64896E-38 | 3.27 | 12.21 | 3.73 | 0.76 | 0.60 | 0.92 |
| cg14439185 | 2  | SGOL2                                          | 0.00093817  | 3.13 | 3.89  | 1.24 | 0.77 | 0.62 | 0.93 |
| cg05294095 | 19 | PSMD8                                          | 8.07704E-08 | 2.19 | 9.25  | 4.23 | 0.94 | 0.86 | 1.00 |
| cg25344180 | 17 | RNFT1                                          | 1.48259E-08 | 3.00 | 7.14  | 2.38 | 0.84 | 0.71 | 0.97 |
| cg10602468 | 19 | CYTH2                                          | 5.91176E-12 | 2.68 | 10.03 | 3.75 | 0.84 | 0.70 | 0.97 |
| cg08336315 | 6  | TRERF1                                         | 0.008181715 | 2.07 | 4.50  | 2.18 | 0.81 | 0.66 | 0.95 |
| cg08897132 | 17 | DCXR                                           | 4.30203E-06 | 2.44 | 6.74  | 2.76 | 0.79 | 0.65 | 0.94 |
| cg18530950 | 2  | IWS1                                           | 0.014482174 | 3.01 | 2.99  | 0.99 | 0.79 | 0.64 | 0.94 |
| cg22267597 | 17 | MYH10                                          | 0.00194373  | 3.63 | 3.36  | 0.93 | 0.81 | 0.66 | 0.95 |
| cg00200289 | 17 | GRB2                                           | 0.03432636  | 2.26 | 3.30  | 1.46 | 0.77 | 0.62 | 0.93 |
| cg12229767 | 7  | STAG3L1; STAG3L3;<br>PMS2P7;<br>PMS2P5; PMS2P2 | 3.37361E-40 | 4.71 | 15.73 | 3.34 | 0.82 | 0.68 | 0.96 |
| cg08680689 | 19 | ELOF1                                          | 9.80701E-05 | 2.88 | 4.86  | 1.69 | 0.82 | 0.68 | 0.96 |
| cg02774380 | 1  | AP4B1; DCLRE1B                                 | 6.92647E-05 | 2.28 | 6.16  | 2.71 | 0.75 | 0.59 | 0.91 |
| cg01560790 | 2  | PPP4R3B                                        | 0.000105084 | 3.09 | 4.61  | 1.49 | 0.78 | 0.63 | 0.93 |
| cg21538020 | 3  | SLC33A1                                        | 3.22517E-39 | 7.21 | 11.79 | 1.64 | 0.76 | 0.60 | 0.92 |
| cg22963915 | 19 | MATK                                           | 1.26896E-10 | 3.06 | 8.20  | 2.68 | 0.85 | 0.72 | 0.98 |
| cg17720231 | 1  | IGSF9                                          | 6.74508E-40 | 2.58 | 19.15 | 7.43 | 0.76 | 0.60 | 0.92 |
| cg11939631 | 5  | RUFY1                                          | 0.000655018 | 2.33 | 5.07  | 2.17 | 0.76 | 0.60 | 0.92 |
| cg10646633 | 19 | ZNF224                                         | 1.53883E-40 | 7.37 | 15.20 | 2.06 | 0.75 | 0.58 | 0.91 |
| cg24139898 | 19 | HPN                                            | 2.65129E-39 | 4.88 | 13.02 | 2.67 | 0.75 | 0.59 | 0.91 |
| cg01892655 | 3  | TMEM41A                                        | 9.48912E-41 | 4.22 | 17.81 | 4.22 | 0.83 | 0.69 | 0.97 |
| cg12292808 | 19 | UPF1                                           | 0.000430145 | 3.08 | 4.18  | 1.36 | 0.80 | 0.66 | 0.95 |
| cg23948071 | 20 | CENPB                                          | 2.54381E-05 | 2.87 | 5.29  | 1.85 | 0.79 | 0.64 | 0.94 |
| cg11078683 | 17 | LHX1                                           | 4.49182E-10 | 2.57 | 9.24  | 3.60 | 0.77 | 0.62 | 0.93 |
| cg03281368 | 1  | H3F3A; H3F3AP4                                 | 5.82074E-09 | 2.54 | 8.56  | 3.37 | 0.81 | 0.66 | 0.95 |

|            |    |                        |             |      |       |       |      |      |      |
|------------|----|------------------------|-------------|------|-------|-------|------|------|------|
| cg13597632 | 5  | HMGCS1                 | 3.37571E-06 | 2.38 | 6.99  | 2.93  | 0.83 | 0.69 | 0.97 |
| cg05796727 | 21 | JAM2                   | 0.000940526 | 2.35 | 4.88  | 2.07  | 0.87 | 0.75 | 0.99 |
| cg21015791 | 1  | MDM4                   | 0.016824577 | 2.17 | 3.86  | 1.78  | 0.76 | 0.60 | 0.92 |
| cg06539804 | 20 | CPXM1                  | 1.67272E-09 | 2.17 | 10.90 | 5.03  | 0.75 | 0.59 | 0.91 |
| cg11987819 | 21 | ADARB1                 | 0.00150805  | 2.14 | 5.18  | 2.42  | 0.80 | 0.65 | 0.94 |
| cg22090640 | 19 | CD3EAP; PPP1R13L       | 6.00809E-40 | 2.78 | 18.47 | 6.64  | 0.78 | 0.63 | 0.94 |
| cg16444198 | 3  | HLTF                   | 3.81516E-08 | 2.05 | 10.52 | 5.14  | 0.81 | 0.66 | 0.95 |
| cg21512185 | 2  | GEMIN6                 | 0.012368045 | 2.60 | 3.39  | 1.31  | 0.90 | 0.79 | 1.00 |
| cg17625506 | 6  | HLA-F                  | 3.9682E-05  | 2.50 | 5.79  | 2.31  | 0.81 | 0.67 | 0.95 |
| cg03003009 | 4  | MED28                  | 1.7157E-05  | 2.14 | 7.29  | 3.41  | 0.76 | 0.60 | 0.92 |
| cg16219302 | 15 | ZNF774                 | 1.98362E-06 | 2.22 | 7.81  | 3.52  | 0.87 | 0.75 | 0.99 |
| cg01381678 | 2  | HECW2                  | 0.003189563 | 2.06 | 5.04  | 2.44  | 0.81 | 0.67 | 0.95 |
| cg17588917 | 3  | ARPC4; TTLL3;<br>TADA3 | 0.019602879 | 2.27 | 3.59  | 1.58  | 0.80 | 0.65 | 0.94 |
| cg13471114 | 2  | OTX1                   | 1.09156E-14 | 2.33 | 13.77 | 5.90  | 0.76 | 0.60 | 0.92 |
| cg05586242 | 3  | BTB; HACL1             | 0.000583589 | 3.18 | 4.00  | 1.26  | 0.83 | 0.70 | 0.97 |
| cg04826071 | 15 | TTBK2                  | 3.89522E-42 | 2.31 | 29.09 | 12.60 | 0.85 | 0.71 | 0.98 |
| cg17211192 | 8  | SNX16                  | 4.08051E-07 | 2.24 | 8.36  | 3.74  | 0.77 | 0.62 | 0.93 |
| cg20705251 | 17 | ZBTB4                  | 1.14283E-07 | 2.04 | 10.09 | 4.94  | 0.77 | 0.61 | 0.92 |
| cg23831542 | 17 | TMEM11                 | 0.000428217 | 2.34 | 5.23  | 2.23  | 0.84 | 0.70 | 0.97 |
| cg17670640 | 6  | TAP2                   | 9.03216E-09 | 2.27 | 9.62  | 4.24  | 0.81 | 0.66 | 0.95 |
| cg07722274 | 9  | SLC1A1                 | 0.014695169 | 2.26 | 3.76  | 1.66  | 0.78 | 0.63 | 0.93 |
| cg14522873 | 20 | XRN2                   | 0.002206904 | 2.55 | 4.18  | 1.64  | 0.77 | 0.62 | 0.93 |
| cg12237591 | 19 | AP1M1                  | 0.032137812 | 2.36 | 3.20  | 1.35  | 0.77 | 0.62 | 0.93 |
| cg07320819 | 13 | RB1                    | 3.27648E-07 | 4.10 | 5.28  | 1.29  | 0.76 | 0.60 | 0.92 |
| cg21682474 | 13 | N4BP2L2                | 0.001526208 | 3.14 | 3.72  | 1.19  | 0.75 | 0.58 | 0.91 |
| cg19519384 | 6  | TRIM27                 | 4.98784E-12 | 2.52 | 10.74 | 4.26  | 0.79 | 0.64 | 0.94 |
| cg25522894 | 2  | PLB1                   | 0.002663237 | 2.38 | 4.36  | 1.83  | 0.88 | 0.76 | 0.99 |
| cg05845808 | 19 | CCDC159; TMEM205       | 1.60198E-41 | 2.29 | 27.01 | 11.78 | 0.89 | 0.78 | 1.00 |
| cg23418208 | 14 | ZFYVE21; XRCC3         | 1.33455E-05 | 2.28 | 6.80  | 2.98  | 0.78 | 0.63 | 0.93 |
| cg15388570 | 14 | ADCK1                  | 3.50053E-10 | 2.28 | 10.67 | 4.67  | 0.85 | 0.73 | 0.98 |
| cg05637773 | 6  | JARID2                 | 1.2502E-06  | 2.08 | 8.78  | 4.23  | 0.75 | 0.59 | 0.91 |
| cg22413205 | 8  | PDP1                   | 2.52529E-06 | 2.07 | 8.51  | 4.11  | 0.80 | 0.65 | 0.94 |
| cg00418743 | 6  | XPO5; POLH             | 4.08618E-05 | 2.02 | 7.49  | 3.71  | 0.82 | 0.68 | 0.96 |
| cg16537756 | 20 | PTGIS                  | 9.90941E-06 | 2.08 | 7.82  | 3.76  | 0.78 | 0.63 | 0.94 |
| cg10314670 | 19 | PPM1N; RTN2            | 0.0024294   | 2.25 | 4.69  | 2.09  | 0.75 | 0.59 | 0.91 |
| cg05386387 | 18 | FBXO15                 | 0.003054209 | 4.65 | 2.92  | 0.63  | 0.85 | 0.72 | 0.98 |
| cg21543045 | 12 | PRDM4                  | 1.37795E-40 | 2.50 | 22.06 | 8.82  | 0.86 | 0.73 | 0.98 |
| cg25874678 | 3  | TMEM44                 | 2.53212E-05 | 2.42 | 6.16  | 2.55  | 0.76 | 0.60 | 0.92 |
| cg13096007 | 4  | SOD3                   | 0.000680513 | 2.04 | 5.93  | 2.90  | 0.77 | 0.61 | 0.92 |
| cg17354807 | 6  | AARS2                  | 6.02701E-40 | 5.28 | 14.59 | 2.76  | 0.85 | 0.71 | 0.98 |
| cg23339899 | 8  | GPAA1                  | 0.002629182 | 2.61 | 4.03  | 1.54  | 0.80 | 0.66 | 0.95 |
| cg11620687 | 15 | IMP3                   | 0.000432719 | 2.01 | 6.32  | 3.15  | 0.77 | 0.61 | 0.92 |
| cg04861263 | 15 | FOXB1                  | 2.47226E-40 | 5.44 | 15.54 | 2.86  | 0.80 | 0.65 | 0.95 |
| cg21336547 | 19 | AKAP8                  | 0.000587605 | 3.06 | 4.10  | 1.34  | 0.77 | 0.61 | 0.92 |
| cg24877391 | 2  | PEX13; PUS10           | 1.02952E-07 | 7.84 | 4.52  | 0.58  | 0.80 | 0.65 | 0.95 |
| cg26646290 | 12 | CCDC53                 | 2.20067E-10 | 5.01 | 6.19  | 1.24  | 0.86 | 0.73 | 0.98 |
| cg12891667 | 3  | NICN1                  | 3.00354E-12 | 4.43 | 7.27  | 1.64  | 0.80 | 0.66 | 0.95 |
| cg15617297 | 10 | ANXA11                 | 0.013154509 | 3.85 | 2.67  | 0.69  | 0.75 | 0.59 | 0.91 |
| cg03859186 | 16 | ZNF785                 | 0.000753402 | 3.31 | 3.83  | 1.16  | 0.78 | 0.63 | 0.93 |
| cg24767041 | 6  | PSMB8                  | 9.6375E-07  | 3.00 | 6.04  | 2.01  | 0.80 | 0.66 | 0.95 |
| cg12104945 | 11 | ARHGEF17               | 0.03630266  | 2.99 | 2.62  | 0.88  | 0.90 | 0.79 | 1.00 |
| cg00859739 | 20 | LSM14B                 | 2.17556E-40 | 2.86 | 19.69 | 6.88  | 0.79 | 0.64 | 0.94 |
| cg03436453 | 1  | WASF2                  | 6.29057E-39 | 2.81 | 14.71 | 5.23  | 0.87 | 0.75 | 0.99 |

|            |    |                    |             |      |       |      |      |      |      |
|------------|----|--------------------|-------------|------|-------|------|------|------|------|
| cg05899224 | 18 | SEC11C             | 3.63158E-05 | 2.53 | 5.76  | 2.28 | 0.77 | 0.61 | 0.92 |
| cg11833275 | 1  | KHDRBS1            | 0.001993677 | 2.47 | 4.34  | 1.76 | 0.76 | 0.60 | 0.92 |
| cg01867111 | 2  | ARL6IP6; PRPF40A   | 0.000202951 | 2.34 | 5.54  | 2.36 | 0.81 | 0.66 | 0.95 |
| cg01573650 | 16 | HIRIP3; INO80E     | 6.07921E-06 | 2.29 | 7.11  | 3.11 | 0.80 | 0.65 | 0.95 |
| cg03745002 | 16 | TOX3               | 3.75326E-07 | 2.22 | 8.46  | 3.81 | 0.79 | 0.64 | 0.94 |
| cg19850348 | 15 | PYGO1              | 0.010004007 | 2.15 | 4.18  | 1.94 | 0.81 | 0.66 | 0.95 |
| cg24853904 | 5  | SEMA5A             | 2.75989E-09 | 2.15 | 10.84 | 5.05 | 0.80 | 0.65 | 0.94 |
| cg09703789 | 6  | TUBE1              | 0.015461548 | 2.15 | 3.95  | 1.84 | 0.78 | 0.63 | 0.93 |
| cg27435133 | 16 | CBFA2T3            | 5.8839E-07  | 2.10 | 8.96  | 4.27 | 0.76 | 0.60 | 0.92 |
| cg16851799 | 1  | CASP9              | 0.000129466 | 2.07 | 6.64  | 3.20 | 0.84 | 0.70 | 0.97 |
| cg21506655 | 2  | NR4A2              | 2.50928E-10 | 2.36 | 10.32 | 4.36 | 0.85 | 0.72 | 0.98 |
| cg15629719 | 13 | SPRY2              | 0.000374402 | 2.39 | 5.18  | 2.16 | 0.76 | 0.60 | 0.92 |
| cg09694403 | 14 | DHRS7              | 0.007228681 | 2.85 | 3.38  | 1.18 | 0.76 | 0.60 | 0.92 |
| cg16742990 | 6  | RNF146             | 3.66105E-13 | 2.42 | 12.06 | 4.98 | 0.75 | 0.58 | 0.91 |
| cg09239744 | 16 | GRIN2A             | 0.022573346 | 2.52 | 3.20  | 1.27 | 0.81 | 0.66 | 0.95 |
| cg16296356 | 17 | RAD51L3            | 6.79023E-40 | 6.15 | 13.99 | 2.27 | 0.82 | 0.68 | 0.96 |
| cg12927990 | 18 | GRP                | 4.65386E-05 | 2.40 | 5.97  | 2.49 | 0.84 | 0.71 | 0.97 |
| cg02639808 | 4  | CCNI               | 2.98981E-07 | 4.55 | 5.07  | 1.12 | 0.75 | 0.59 | 0.91 |
| cg16001418 | 19 | HCST               | 1.32121E-38 | 2.56 | 14.27 | 5.56 | 0.75 | 0.59 | 0.91 |
| cg10604703 | 9  | WDR5               | 1.39643E-06 | 2.45 | 7.08  | 2.89 | 0.76 | 0.60 | 0.92 |
| cg00747619 | 16 | CPPED1             | 0.002055804 | 2.79 | 3.92  | 1.41 | 0.77 | 0.61 | 0.92 |
| cg07706279 | 3  | GORASP1; TTC21A    | 0.002414759 | 2.47 | 4.27  | 1.73 | 0.77 | 0.61 | 0.92 |
| cg07849302 | 10 | TCF7L2             | 1.02158E-06 | 2.85 | 6.27  | 2.20 | 0.82 | 0.68 | 0.96 |
| cg19351189 | 16 | SLC12A4            | 0.000151992 | 2.54 | 5.23  | 2.06 | 0.81 | 0.66 | 0.95 |
| cg16909962 | 1  | RAB4A              | 0.036695684 | 2.63 | 2.86  | 1.09 | 0.81 | 0.67 | 0.96 |
| cg18590590 | 1  | LRRC42; HSPB11     | 6.05625E-13 | 4.60 | 7.42  | 1.61 | 0.82 | 0.68 | 0.96 |
| cg05338745 | 12 | CCDC59             | 2.10056E-05 | 6.12 | 3.80  | 0.62 | 0.77 | 0.61 | 0.93 |
| cg24143101 | 3  | FNDC3B             | 5.60466E-40 | 5.37 | 14.62 | 2.72 | 0.79 | 0.64 | 0.94 |
| cg26425904 | 15 | OCA2               | 5.8411E-10  | 4.64 | 6.21  | 1.34 | 0.77 | 0.62 | 0.93 |
| cg24153071 | 19 | CCDC130            | 0.000108816 | 4.07 | 3.97  | 0.98 | 0.81 | 0.66 | 0.95 |
| cg20640698 | 12 | LOH12CR1; LOH12CR2 | 1.46105E-10 | 3.22 | 7.86  | 2.44 | 0.81 | 0.67 | 0.95 |
| cg13528777 | 6  | PHF1               | 0.001370197 | 3.03 | 3.84  | 1.27 | 0.76 | 0.60 | 0.92 |
| cg18443229 | 22 | NOL12              | 0.001704143 | 2.84 | 3.94  | 1.39 | 0.85 | 0.73 | 0.98 |
| cg22244076 | 20 | EIF6               | 1.28852E-05 | 2.83 | 5.55  | 1.96 | 0.85 | 0.72 | 0.98 |
| cg06956240 | 4  | SLC9B2             | 2.40891E-39 | 2.78 | 16.33 | 5.88 | 0.93 | 0.84 | 1.00 |
| cg19041146 | 11 | TMEM25; TTC36      | 0.032023419 | 2.68 | 2.89  | 1.08 | 0.76 | 0.60 | 0.92 |
| cg06838921 | 16 | APRT               | 0.030169184 | 2.62 | 2.96  | 1.13 | 0.76 | 0.60 | 0.92 |
| cg14664714 | 12 | STK38L             | 0.001974047 | 2.52 | 4.27  | 1.70 | 0.78 | 0.62 | 0.93 |
| cg13215078 | 11 | NPAS4              | 1.11696E-12 | 2.07 | 14.63 | 7.05 | 0.85 | 0.72 | 0.98 |
| cg21933829 | 16 | METTL9             | 0.026028171 | 2.07 | 3.82  | 1.85 | 0.87 | 0.75 | 0.99 |
| cg16321228 | 10 | PFKP               | 0.000326425 | 2.05 | 6.27  | 3.05 | 0.83 | 0.69 | 0.96 |
| cg02153584 | 22 | CCDC117            | 4.71402E-06 | 4.29 | 4.61  | 1.07 | 0.78 | 0.63 | 0.94 |
| cg01999229 | 19 | SNRNP70            | 0.012615439 | 2.20 | 3.96  | 1.80 | 0.75 | 0.59 | 0.91 |
| cg10205852 | 7  | CLDN12             | 1.70564E-09 | 2.50 | 9.10  | 3.65 | 0.76 | 0.60 | 0.92 |
| cg23359173 | 7  | PSPH; CCT6A        | 8.55209E-06 | 2.02 | 8.24  | 4.07 | 0.75 | 0.59 | 0.91 |
| cg26362852 | 5  | RNF145             | 4.90334E-43 | 5.09 | 22.73 | 4.46 | 0.76 | 0.60 | 0.92 |
| cg19580633 | 5  | RPL26L1            | 1.823E-08   | 4.54 | 5.62  | 1.24 | 0.85 | 0.73 | 0.98 |
| cg07490279 | 1  | ATAD3B             | 0.043980638 | 2.36 | 3.03  | 1.28 | 0.77 | 0.61 | 0.92 |
| cg04630879 | 15 | CDAN1              | 0.007193487 | 2.04 | 4.65  | 2.28 | 0.77 | 0.61 | 0.92 |
| cg05957736 | 3  | PHLDB2             | 1.8385E-09  | 3.46 | 6.94  | 2.01 | 0.81 | 0.66 | 0.95 |
| cg19908534 | 15 | FBN1               | 8.67605E-09 | 2.20 | 10.02 | 4.55 | 0.77 | 0.62 | 0.93 |
| cg18415182 | 14 | MAPK1IP1L          | 1.77985E-08 | 2.73 | 7.66  | 2.80 | 0.88 | 0.76 | 0.99 |
| cg17043366 | 19 | ZNF414             | 0.011735537 | 3.16 | 2.99  | 0.94 | 0.82 | 0.69 | 0.96 |
| cg26262375 | 19 | WDR62; THAP8       | 8.62464E-06 | 2.53 | 6.25  | 2.47 | 0.83 | 0.69 | 0.96 |



|            |    |               |             |      |       |       |      |      |      |
|------------|----|---------------|-------------|------|-------|-------|------|------|------|
| cg23539966 | 2  | RTN4          | 0.015165857 | 2.38 | 3.56  | 1.49  | 0.76 | 0.60 | 0.92 |
| cg03445574 | 2  | SF3B1         | 6.23239E-05 | 2.01 | 7.31  | 3.63  | 0.75 | 0.59 | 0.91 |
| cg16684668 | 5  | WDR55         | 0.003113642 | 3.30 | 3.38  | 1.02  | 0.76 | 0.60 | 0.92 |
| cg15017283 | 11 | FOXRED1; SRPR | 6.61922E-08 | 3.23 | 6.41  | 1.99  | 0.75 | 0.58 | 0.91 |
| cg09804398 | 20 | NINL          | 0.01546815  | 3.12 | 2.90  | 0.93  | 0.88 | 0.76 | 0.99 |
| cg25169790 | 17 | KIAA0195      | 1.08466E-11 | 2.83 | 9.36  | 3.30  | 0.81 | 0.66 | 0.95 |
| cg06934911 | 5  | MAT2B         | 1.41273E-06 | 2.71 | 6.44  | 2.38  | 0.75 | 0.59 | 0.91 |
| cg00908189 | 16 | PIGQ          | 3.44719E-08 | 2.50 | 8.15  | 3.26  | 0.75 | 0.59 | 0.91 |
| cg18494399 | 11 | SLC1A2        | 4.46161E-07 | 2.48 | 7.38  | 2.97  | 0.81 | 0.67 | 0.96 |
| cg15810163 | 19 | KRI1          | 0.028287502 | 2.30 | 3.34  | 1.45  | 0.90 | 0.79 | 1.00 |
| cg00867273 | 16 | ROGDI         | 2.2854E-40  | 2.21 | 23.29 | 10.52 | 0.78 | 0.63 | 0.93 |
| cg07140217 | 7  | ZYX           | 0.000103778 | 2.18 | 6.31  | 2.89  | 0.81 | 0.66 | 0.95 |
| cg25471404 | 6  | ABCC10        | 8.77848E-05 | 2.11 | 6.67  | 3.16  | 0.78 | 0.63 | 0.93 |
| cg17448127 | 4  | RPL34         | 3.59544E-07 | 2.92 | 6.43  | 2.20  | 0.78 | 0.63 | 0.93 |
| cg12934804 | 14 | ARG2          | 0.000884951 | 5.02 | 3.17  | 0.63  | 0.88 | 0.76 | 1.00 |
| cg01691333 | 10 | CREM          | 0.00017144  | 2.71 | 4.89  | 1.80  | 0.82 | 0.68 | 0.96 |
| cg16761549 | 6  | TMEM170B      | 0.011157524 | 3.64 | 2.80  | 0.77  | 0.82 | 0.68 | 0.96 |
| cg03286969 | 7  | AASS          | 0.003571087 | 2.11 | 4.84  | 2.29  | 0.75 | 0.59 | 0.91 |
| cg08165558 | 14 | DHRS4         | 1.11216E-05 | 2.10 | 7.68  | 3.66  | 0.76 | 0.60 | 0.92 |
| cg09733424 | 1  | NVL           | 8.11204E-06 | 2.23 | 7.22  | 3.24  | 0.89 | 0.77 | 1.00 |
| cg01754828 | 6  | ADGRB3        | 2.22526E-14 | 2.03 | 16.72 | 8.22  | 0.83 | 0.70 | 0.97 |
| cg22196952 | 12 | GRASP         | 2.53836E-05 | 2.92 | 5.23  | 1.79  | 0.84 | 0.70 | 0.97 |
| cg02840367 | 8  | FDFT1         | 9.95786E-06 | 2.16 | 7.44  | 3.45  | 0.77 | 0.62 | 0.93 |
| cg18039556 | 22 | RAB36         | 0.000811862 | 2.26 | 5.17  | 2.29  | 0.83 | 0.69 | 0.97 |
| cg22513924 | 1  | NMNAT2        | 1.13839E-40 | 2.53 | 22.23 | 8.80  | 0.78 | 0.63 | 0.93 |
| cg05013027 | 6  | GNL1          | 5.20701E-40 | 4.30 | 15.60 | 3.63  | 0.77 | 0.62 | 0.93 |
| cg14959291 | 3  | EPHA6         | 5.10483E-14 | 5.23 | 7.44  | 1.42  | 0.78 | 0.63 | 0.94 |
| cg03466082 | 12 | ZNF384        | 4.32394E-07 | 2.92 | 6.38  | 2.18  | 0.77 | 0.62 | 0.93 |
| cg15524173 | 19 | PLD3          | 0.005204489 | 2.72 | 3.63  | 1.34  | 0.78 | 0.63 | 0.94 |
| cg18640183 | 5  | P4HA2         | 0.003188261 | 2.71 | 3.84  | 1.42  | 0.75 | 0.58 | 0.91 |
| cg26290478 | 17 | EXOC7         | 6.15684E-05 | 2.69 | 5.28  | 1.97  | 0.81 | 0.66 | 0.95 |
| cg06735806 | 14 | MIPOL1        | 3.604E-39   | 2.43 | 17.08 | 7.03  | 0.81 | 0.66 | 0.95 |
| cg22842854 | 12 | HIP1R         | 9.79158E-39 | 2.35 | 15.70 | 6.68  | 0.78 | 0.63 | 0.94 |
| cg11405279 | 15 | SEMA4B        | 0.018668985 | 2.34 | 3.51  | 1.50  | 0.79 | 0.63 | 0.94 |
| cg19735074 | 1  | HIAT1         | 5.66679E-09 | 2.33 | 9.48  | 4.08  | 0.78 | 0.63 | 0.94 |
| cg22491927 | 19 | CACNA1A       | 1.04305E-05 | 2.05 | 7.96  | 3.88  | 0.77 | 0.61 | 0.92 |
| cg13735965 | 19 | ZNF616        | 2.28013E-38 | 2.40 | 13.94 | 5.81  | 0.77 | 0.62 | 0.93 |
| cg14120359 | 9  | SMARCA2       | 1.39355E-13 | 2.17 | 14.37 | 6.63  | 0.75 | 0.58 | 0.91 |
| cg04653284 | 16 | SH2B1         | 0.030747107 | 2.22 | 3.42  | 1.54  | 0.87 | 0.75 | 0.99 |
| cg00625177 | 16 | TXNL4B; DHX38 | 0.003866289 | 2.88 | 3.60  | 1.25  | 0.77 | 0.62 | 0.93 |
| cg06627825 | 2  | C1D           | 0.001144901 | 2.01 | 5.78  | 2.87  | 0.80 | 0.65 | 0.94 |
| cg17971929 | 21 | PSMG1         | 4.49563E-05 | 2.05 | 7.28  | 3.55  | 0.76 | 0.60 | 0.92 |
| cg06867065 | 19 | CLDND2        | 1.16535E-08 | 3.93 | 6.09  | 1.55  | 0.79 | 0.64 | 0.94 |
| cg26312059 | 12 | UBC           | 0.001701374 | 2.02 | 5.55  | 2.75  | 0.87 | 0.75 | 0.99 |
| cg03787849 | 17 | MAP3K14       | 0.003872479 | 2.08 | 4.87  | 2.34  | 0.80 | 0.66 | 0.95 |
| cg16476890 | 4  | RBM47         | 1.08736E-07 | 3.99 | 5.58  | 1.40  | 0.76 | 0.60 | 0.92 |
| cg17771515 | 6  | CNKSR3        | 0.002527478 | 2.12 | 5.00  | 2.36  | 0.75 | 0.58 | 0.91 |
| cg24386890 | 2  | HOXD1; HAGLR  | 7.63518E-05 | 2.65 | 5.27  | 1.98  | 0.80 | 0.65 | 0.95 |
| cg07916071 | 1  | PSMD4         | 1.53884E-12 | 4.19 | 7.58  | 1.81  | 0.82 | 0.68 | 0.96 |
| cg14370961 | 14 | BRF1          | 3.08738E-10 | 3.58 | 7.18  | 2.01  | 0.91 | 0.81 | 1.00 |
| cg12727596 | 16 | PAM16; CORO7  | 0.000165947 | 3.53 | 4.13  | 1.17  | 0.78 | 0.62 | 0.93 |
| cg02058552 | 10 | NET1          | 5.70687E-11 | 3.09 | 8.33  | 2.70  | 0.82 | 0.68 | 0.96 |
| cg00482898 | 2  | SNRPG         | 2.03321E-08 | 2.90 | 7.25  | 2.50  | 0.78 | 0.63 | 0.93 |
| cg18469811 | 11 | GUCY2E        | 0.033889619 | 2.79 | 2.77  | 0.99  | 0.76 | 0.60 | 0.92 |

|            |    |                 |             |      |       |      |      |      |      |
|------------|----|-----------------|-------------|------|-------|------|------|------|------|
| cg16770712 | 3  | SS18L2          | 2.1214E-12  | 2.71 | 10.19 | 3.76 | 0.77 | 0.61 | 0.92 |
| cg23491124 | 18 | PMAIP1          | 1.12914E-08 | 2.55 | 8.34  | 3.28 | 0.75 | 0.59 | 0.91 |
| cg17846100 | 22 | MCAT            | 0.000631527 | 2.50 | 4.76  | 1.90 | 0.83 | 0.70 | 0.97 |
| cg20493960 | 11 | AMOTL1          | 2.63548E-08 | 2.48 | 8.32  | 3.36 | 0.85 | 0.73 | 0.98 |
| cg19045300 | 21 | LSS; MCM3AP-AS1 | 0.00079438  | 2.47 | 4.72  | 1.91 | 0.76 | 0.60 | 0.92 |
| cg16173736 | 12 | RERG            | 2.08395E-11 | 2.36 | 11.13 | 4.71 | 0.81 | 0.66 | 0.95 |
| cg07254066 | 16 | IRX5            | 2.23544E-11 | 2.33 | 11.32 | 4.86 | 0.77 | 0.61 | 0.92 |
| cg00575153 | 8  | PLEC1           | 7.55405E-08 | 2.32 | 8.59  | 3.70 | 0.75 | 0.58 | 0.91 |
| cg14356946 | 20 | EIF2S2          | 3.02981E-14 | 2.24 | 14.24 | 6.36 | 0.75 | 0.58 | 0.91 |
| cg00366818 | 10 | ARMC4           | 0.036692874 | 2.19 | 3.37  | 1.54 | 0.80 | 0.65 | 0.95 |
| cg23840219 | 6  | SESN1           | 7.42104E-11 | 2.16 | 12.13 | 5.61 | 0.75 | 0.59 | 0.91 |
| cg04200835 | 16 | VKORC1          | 0.008759897 | 2.34 | 3.89  | 1.66 | 0.85 | 0.72 | 0.98 |
| cg22758957 | 3  | PSMD2           | 2.02034E-07 | 3.04 | 6.40  | 2.10 | 0.84 | 0.70 | 0.97 |
| cg00212272 | 16 | TSNAXIP1        | 7.19839E-08 | 2.52 | 7.86  | 3.12 | 0.78 | 0.63 | 0.94 |
| cg05418736 | 16 | RSPRY1; FAM192A | 4.59381E-39 | 2.76 | 15.37 | 5.58 | 0.77 | 0.61 | 0.92 |
| cg01529917 | 12 | UBE2N           | 0.015395249 | 2.52 | 3.38  | 1.34 | 0.77 | 0.62 | 0.93 |
| cg15933195 | 10 | LRRC27          | 0.000329874 | 4.31 | 3.60  | 0.84 | 0.83 | 0.70 | 0.97 |
| cg15759889 | 19 | DDA1            | 0.001347516 | 2.36 | 4.71  | 2.00 | 0.79 | 0.64 | 0.94 |
| cg01304814 | 3  | PRKAR2A         | 1.47278E-06 | 2.30 | 7.58  | 3.29 | 0.78 | 0.62 | 0.93 |
| cg04634693 | 4  | MMAA            | 0.011508373 | 2.74 | 3.29  | 1.20 | 0.77 | 0.62 | 0.93 |
| cg23709321 | 16 | TMEM170A        | 0.047330314 | 2.76 | 2.64  | 0.96 | 0.82 | 0.68 | 0.96 |
| cg14694176 | 8  | TCEA1           | 2.96014E-38 | 7.32 | 9.10  | 1.24 | 0.88 | 0.76 | 1.00 |
| cg11260709 | 17 | EIF5A           | 1.59473E-09 | 3.97 | 6.47  | 1.63 | 0.82 | 0.68 | 0.96 |
| cg19309149 | 9  | GKAP1           | 8.70665E-10 | 3.89 | 6.65  | 1.71 | 0.76 | 0.60 | 0.92 |
| cg03771255 | 4  | RPS3A           | 0.01335417  | 3.26 | 2.89  | 0.89 | 0.77 | 0.61 | 0.92 |
| cg06329261 | 14 | TTC5            | 2.29626E-08 | 3.20 | 6.71  | 2.10 | 0.78 | 0.62 | 0.93 |
| cg25096680 | 10 | HIF1AN          | 0.001298543 | 2.61 | 4.31  | 1.65 | 0.83 | 0.70 | 0.97 |
| cg11864882 | 18 | PSTPIP2         | 0.031888751 | 2.43 | 3.12  | 1.29 | 0.76 | 0.61 | 0.92 |
| cg18158043 | 14 | AK7             | 5.60532E-12 | 2.42 | 11.22 | 4.64 | 0.82 | 0.68 | 0.96 |
| cg26879696 | 10 | VTI1A; ZDHHC6   | 0.016984623 | 2.32 | 3.60  | 1.55 | 0.77 | 0.61 | 0.92 |
| cg27501451 | 6  | BRD2            | 3.6016E-06  | 2.28 | 7.32  | 3.21 | 0.85 | 0.72 | 0.98 |
| cg23737229 | 21 | ADAMTS1         | 2.28715E-06 | 2.26 | 7.58  | 3.35 | 0.80 | 0.66 | 0.95 |
| cg02161262 | 2  | BIN1            | 4.18237E-11 | 2.02 | 13.83 | 6.86 | 0.79 | 0.64 | 0.94 |
| cg25310430 | 7  | WDR60           | 0.000717218 | 2.52 | 4.68  | 1.86 | 0.75 | 0.59 | 0.91 |
| cg18379624 | 13 | COG3            | 7.76384E-07 | 2.27 | 7.97  | 3.51 | 0.78 | 0.62 | 0.93 |
| cg26575164 | 1  | SNX27           | 3.63263E-41 | 2.53 | 23.94 | 9.45 | 0.78 | 0.63 | 0.93 |
| cg22068773 | 1  | SWT1; TRMT1L    | 0.028389464 | 2.13 | 3.64  | 1.71 | 0.76 | 0.60 | 0.92 |
| cg08378782 | 11 | RASGRP2         | 0.005323296 | 2.74 | 3.60  | 1.32 | 0.79 | 0.64 | 0.94 |
| cg07015190 | 6  | RPS6KA2         | 0.003594762 | 2.70 | 3.80  | 1.41 | 0.82 | 0.68 | 0.96 |
| cg12014623 | 3  | SEC22C          | 5.73961E-07 | 2.74 | 6.65  | 2.43 | 0.75 | 0.59 | 0.91 |
| cg26545983 | 19 | ELL             | 4.49493E-05 | 4.40 | 4.05  | 0.92 | 0.87 | 0.75 | 0.99 |
| cg23395483 | 19 | TMEM149         | 0.003404881 | 2.83 | 3.69  | 1.30 | 0.75 | 0.58 | 0.91 |
| cg02547269 | 6  | FOXF2           | 2.20342E-06 | 2.34 | 7.28  | 3.11 | 0.84 | 0.71 | 0.97 |
| cg07941700 | 3  | NEK4            | 2.44665E-06 | 3.20 | 5.54  | 1.73 | 0.83 | 0.69 | 0.96 |
| cg24337497 | 6  | CENPQ; MUT      | 5.7266E-07  | 2.96 | 6.25  | 2.12 | 0.78 | 0.63 | 0.93 |
| cg20201475 | 3  | MECOM           | 9.33751E-14 | 2.82 | 10.59 | 3.76 | 0.83 | 0.69 | 0.97 |
| cg03087610 | 10 | AIFM2           | 8.24195E-07 | 2.75 | 6.53  | 2.38 | 0.77 | 0.61 | 0.92 |
| cg21939213 | 1  | NRD1            | 0.002508182 | 2.71 | 3.93  | 1.45 | 0.76 | 0.60 | 0.92 |
| cg25594636 | 1  | YOD1            | 0.028552834 | 2.57 | 3.03  | 1.18 | 0.76 | 0.60 | 0.92 |
| cg14235434 | 3  | UBP1            | 1.37206E-07 | 2.51 | 7.67  | 3.05 | 0.85 | 0.73 | 0.98 |
| cg09238756 | 1  | HIPK1           | 8.36152E-07 | 2.31 | 7.78  | 3.37 | 0.85 | 0.73 | 0.98 |
| cg23002761 | 1  | FBLIM1          | 1.563E-09   | 2.22 | 10.57 | 4.77 | 0.76 | 0.60 | 0.92 |
| cg10439765 | 20 | SLC12A5         | 5.18154E-39 | 2.14 | 18.13 | 8.45 | 0.91 | 0.80 | 1.00 |
| cg07229027 | 8  | ATAD2           | 0.018243822 | 2.09 | 3.97  | 1.90 | 0.77 | 0.61 | 0.92 |

|            |    |                |             |      |       |      |      |      |      |
|------------|----|----------------|-------------|------|-------|------|------|------|------|
| cg19139691 | 2  | KDM3A          | 3.47669E-05 | 3.01 | 5.02  | 1.67 | 0.89 | 0.78 | 1.00 |
| cg00342532 | 19 | KCNC3          | 6.55111E-05 | 2.53 | 5.54  | 2.19 | 0.82 | 0.68 | 0.96 |
| cg23504634 | 3  | EIF4G1         | 0.005013711 | 3.50 | 3.12  | 0.89 | 0.85 | 0.72 | 0.98 |
| cg04988224 | 19 | RPL18; SPHK2   | 4.07019E-07 | 4.10 | 5.24  | 1.28 | 0.85 | 0.72 | 0.98 |
| cg01050704 | 19 | MZF1           | 0.00849977  | 2.33 | 3.92  | 1.68 | 0.79 | 0.64 | 0.94 |
| cg18357291 | 3  | NUP210         | 6.373E-11   | 4.66 | 6.59  | 1.41 | 0.80 | 0.65 | 0.94 |
| cg14818026 | 1  | NSUN4          | 0.018194032 | 2.36 | 3.49  | 1.48 | 0.79 | 0.64 | 0.94 |
| cg10781048 | 15 | SELS           | 5.22974E-12 | 2.28 | 12.16 | 5.34 | 0.75 | 0.58 | 0.91 |
| cg26445041 | 11 | RAB6A          | 0.000217055 | 3.44 | 4.11  | 1.19 | 0.78 | 0.63 | 0.93 |
| cg12644625 | 22 | SGSM1          | 1.24946E-07 | 3.22 | 6.27  | 1.94 | 0.85 | 0.73 | 0.98 |
| cg26424013 | 16 | DCUN1D3; LYRM1 | 0.037116649 | 3.11 | 2.55  | 0.82 | 0.77 | 0.61 | 0.92 |
| cg14606680 | 17 | FAM64A         | 0.000212613 | 2.85 | 4.64  | 1.63 | 0.85 | 0.72 | 0.98 |
| cg26020522 | 12 | APPL2          | 1.80983E-05 | 2.71 | 5.64  | 2.08 | 0.84 | 0.70 | 0.97 |
| cg06734342 | 3  | SACM1L         | 6.96699E-11 | 2.66 | 9.44  | 3.55 | 0.86 | 0.73 | 0.98 |
| cg27105275 | 9  | GCNT1          | 0.023165538 | 2.49 | 3.22  | 1.29 | 0.77 | 0.62 | 0.93 |
| cg06213463 | 16 | MT3            | 0.000632463 | 2.39 | 4.97  | 2.08 | 0.77 | 0.62 | 0.93 |
| cg16619662 | 19 | EID2           | 0.040549053 | 2.30 | 3.15  | 1.37 | 0.75 | 0.59 | 0.91 |
| cg24174307 | 17 | ATP5H; KCTD2   | 1.21839E-39 | 2.20 | 20.45 | 9.31 | 0.82 | 0.68 | 0.96 |
| cg15709401 | 20 | HSPC072        | 1.80044E-12 | 7.28 | 6.25  | 0.86 | 0.79 | 0.64 | 0.94 |
| cg26776742 | 6  | KPNA5          | 0.018013059 | 2.18 | 3.80  | 1.74 | 0.77 | 0.62 | 0.93 |
| cg18216767 | 18 | VPS4B          | 0.022464854 | 2.29 | 3.49  | 1.53 | 0.75 | 0.59 | 0.91 |
| cg09799983 | 2  | CYP1B1         | 9.32541E-39 | 3.71 | 12.41 | 3.34 | 0.79 | 0.64 | 0.94 |
| cg15259947 | 6  | MTHFD1L        | 0.00663151  | 2.74 | 3.52  | 1.28 | 0.75 | 0.58 | 0.91 |
| cg05755010 | 1  | ACP6           | 0.016598953 | 2.13 | 3.94  | 1.84 | 0.75 | 0.59 | 0.91 |
| cg07847424 | 16 | RHBDL1         | 0.001504035 | 2.35 | 4.69  | 2.00 | 0.83 | 0.70 | 0.97 |
| cg23202277 | 17 | MAPT           | 4.46412E-06 | 2.68 | 6.15  | 2.30 | 0.76 | 0.60 | 0.92 |
| cg14389183 | 18 | MBD1           | 8.67153E-15 | 2.08 | 16.41 | 7.88 | 0.89 | 0.78 | 1.00 |
| cg23633626 | 1  | DNTTIP2        | 0.009651084 | 3.52 | 2.89  | 0.82 | 0.80 | 0.65 | 0.95 |
| cg09525523 | 12 | DERA           | 1.57461E-13 | 2.19 | 14.13 | 6.45 | 0.80 | 0.65 | 0.95 |
| cg04166546 | 6  | DHX16          | 1.25759E-05 | 2.56 | 6.07  | 2.37 | 0.84 | 0.71 | 0.97 |
| cg05121388 | 17 | METTL2A        | 2.41814E-06 | 4.18 | 4.80  | 1.15 | 0.82 | 0.68 | 0.96 |
| cg27063739 | 9  | SEC16A         | 0.033659762 | 2.09 | 3.60  | 1.72 | 0.78 | 0.63 | 0.94 |
| cg14515699 | 12 | PPM1H          | 7.82067E-07 | 2.94 | 6.20  | 2.11 | 0.76 | 0.60 | 0.92 |
| cg07318231 | 5  | FBXW11         | 1.05961E-13 | 2.84 | 10.50 | 3.70 | 0.75 | 0.59 | 0.91 |
| cg04110109 | 17 | FKBP10; SC65   | 8.83786E-39 | 2.51 | 15.17 | 6.05 | 0.86 | 0.73 | 0.98 |
| cg20407116 | 11 | POLA2          | 2.6312E-38  | 4.68 | 10.15 | 2.17 | 0.84 | 0.71 | 0.97 |
| cg25519033 | 11 | TMEM80; DEAF1  | 0.037444008 | 2.87 | 2.68  | 0.93 | 0.82 | 0.68 | 0.96 |
| cg03159396 | 6  | TFAP2B         | 9.98869E-40 | 2.74 | 17.85 | 6.52 | 0.83 | 0.70 | 0.97 |
| cg17070338 | 13 | CARKD          | 0.008464634 | 2.66 | 3.50  | 1.32 | 0.85 | 0.71 | 0.98 |
| cg03309253 | 19 | LTBP4          | 8.65072E-06 | 2.10 | 7.77  | 3.70 | 0.86 | 0.74 | 0.99 |
| cg08154698 | 19 | LASS4          | 0.000245369 | 2.06 | 6.37  | 3.09 | 0.75 | 0.59 | 0.91 |
| cg22551196 | 12 | IKBIP; APAF1   | 0.000151592 | 2.40 | 5.51  | 2.29 | 0.76 | 0.60 | 0.92 |
| cg09436851 | 3  | LRCH3          | 1.07481E-05 | 2.90 | 5.50  | 1.90 | 0.78 | 0.62 | 0.93 |
| cg25569234 | 6  | PFDN6; WDR46   | 4.68822E-39 | 2.67 | 15.62 | 5.85 | 0.75 | 0.59 | 0.91 |
| cg11748517 | 9  | PDCL           | 1.2008E-06  | 2.20 | 8.10  | 3.68 | 0.87 | 0.75 | 0.99 |
| cg19688118 | 5  | CCDC112        | 2.00038E-14 | 2.04 | 16.65 | 8.15 | 0.83 | 0.69 | 0.97 |
| cg04955406 | 2  | ORMDL1; PMS1   | 0.020188177 | 2.50 | 3.28  | 1.31 | 0.77 | 0.61 | 0.92 |
| cg15886919 | 7  | METTL2B        | 0.011309825 | 2.91 | 3.16  | 1.08 | 0.76 | 0.60 | 0.92 |
| cg16817229 | 21 | MX1            | 3.49145E-06 | 2.88 | 5.86  | 2.04 | 0.77 | 0.61 | 0.92 |
| cg26226802 | 4  | GLRA3          | 1.54894E-05 | 2.77 | 5.59  | 2.01 | 0.75 | 0.59 | 0.91 |
| cg14409958 | 8  | ENPP2          | 2.85737E-15 | 2.54 | 12.64 | 4.97 | 0.76 | 0.60 | 0.92 |
| cg15674575 | 1  | FAM46C         | 1.03644E-08 | 2.42 | 8.82  | 3.64 | 0.78 | 0.63 | 0.93 |
| cg04730071 | 17 | LIMD2          | 0.005435967 | 2.37 | 4.07  | 1.72 | 0.76 | 0.60 | 0.92 |
| cg09361488 | 1  | DHRS3          | 6.15082E-05 | 2.35 | 5.99  | 2.54 | 0.80 | 0.65 | 0.94 |

|            |    |               |             |      |       |       |      |      |      |
|------------|----|---------------|-------------|------|-------|-------|------|------|------|
| cg17245735 | 1  | NFIA          | 4.43961E-08 | 2.19 | 9.44  | 4.30  | 0.77 | 0.62 | 0.93 |
| cg16629967 | 4  | HNRNPD        | 0.004127091 | 2.12 | 4.74  | 2.23  | 0.79 | 0.64 | 0.94 |
| cg15660832 | 1  | PROX1         | 7.68933E-05 | 2.10 | 6.79  | 3.24  | 0.77 | 0.61 | 0.92 |
| cg25240047 | 5  | ADAMTS12      | 2.50792E-06 | 2.03 | 8.76  | 4.32  | 0.81 | 0.66 | 0.95 |
| cg18680021 | 14 | OTUB2         | 0.000112569 | 2.69 | 5.08  | 1.89  | 0.76 | 0.60 | 0.92 |
| cg07334717 | 10 | GLUD1; FAM35A | 1.14949E-06 | 2.21 | 8.07  | 3.65  | 0.79 | 0.64 | 0.94 |
| cg22493117 | 19 | TRMT1; NACC1  | 0.002192984 | 2.73 | 3.96  | 1.45  | 0.75 | 0.59 | 0.91 |
| cg12635019 | 15 | PAK6          | 0.011507136 | 2.26 | 3.89  | 1.72  | 0.82 | 0.68 | 0.96 |
| cg25178781 | 13 | ARGLU1        | 1.07474E-11 | 2.31 | 11.70 | 5.07  | 0.77 | 0.61 | 0.92 |
| cg14998457 | 2  | SLC35F5       | 1.10364E-13 | 4.57 | 7.73  | 1.69  | 0.81 | 0.66 | 0.95 |
| cg07857142 | 2  | STK39         | 0.010154469 | 2.35 | 3.79  | 1.61  | 0.76 | 0.60 | 0.92 |
| cg08959305 | 17 | TMEM97        | 0.01349805  | 2.07 | 4.21  | 2.03  | 0.81 | 0.67 | 0.95 |
| cg13794009 | 6  | DDAH2         | 7.09664E-07 | 2.90 | 6.29  | 2.17  | 0.83 | 0.70 | 0.97 |
| cg22256664 | 16 | ZNF598        | 0.015446732 | 2.33 | 3.62  | 1.55  | 0.77 | 0.61 | 0.92 |
| cg09151181 | 14 | SETD3; CCNK   | 9.50837E-05 | 5.20 | 3.66  | 0.70  | 0.81 | 0.67 | 0.95 |
| cg25314532 | 22 | POLR2F        | 0.002644531 | 2.14 | 4.90  | 2.29  | 0.75 | 0.59 | 0.91 |
| cg08866589 | 5  | KIAA0141      | 0.00048608  | 2.86 | 4.35  | 1.52  | 0.76 | 0.60 | 0.92 |
| cg07690783 | 2  | GFPT1         | 0.047362709 | 2.88 | 2.56  | 0.89  | 0.75 | 0.58 | 0.91 |
| cg00108164 | 2  | ACP1; SH3YL1  | 5.38093E-09 | 3.82 | 6.34  | 1.66  | 0.77 | 0.61 | 0.92 |
| cg06152533 | 3  | LRRN1         | 5.22973E-38 | 3.80 | 9.83  | 2.59  | 0.80 | 0.65 | 0.95 |
| cg15518042 | 1  | ZNF643        | 0.003767914 | 2.62 | 3.88  | 1.48  | 0.76 | 0.60 | 0.92 |
| cg07900968 | 19 | ZFP82         | 4.29498E-05 | 2.58 | 5.60  | 2.17  | 0.76 | 0.60 | 0.92 |
| cg13233534 | 1  | UAP1          | 0.004349522 | 2.57 | 3.87  | 1.51  | 0.75 | 0.59 | 0.91 |
| cg16600637 | 3  | CBLB          | 2.55546E-08 | 2.27 | 9.25  | 4.08  | 0.79 | 0.64 | 0.94 |
| cg01587050 | 17 | BRCA1; NBR2   | 3.37089E-07 | 2.19 | 8.67  | 3.96  | 0.77 | 0.61 | 0.92 |
| cg14942464 | 14 | TMED10        | 4.13721E-08 | 2.17 | 9.62  | 4.43  | 0.76 | 0.60 | 0.92 |
| cg18116548 | 2  | PPP1R1C       | 8.71406E-39 | 2.16 | 16.99 | 7.85  | 0.80 | 0.65 | 0.95 |
| cg24530250 | 11 | PHOX2A        | 7.54773E-07 | 2.14 | 8.63  | 4.04  | 0.75 | 0.58 | 0.91 |
| cg02468435 | 9  | NINJ1         | 5.71612E-06 | 2.07 | 8.15  | 3.94  | 0.80 | 0.66 | 0.95 |
| cg22474865 | 17 | WDR81         | 0.002514754 | 2.16 | 4.89  | 2.26  | 0.75 | 0.59 | 0.91 |
| cg00220905 | 5  | RGBM          | 0.00016159  | 2.95 | 4.61  | 1.56  | 0.89 | 0.78 | 1.00 |
| cg18453621 | 9  | LMX1B         | 0.002128773 | 2.71 | 3.99  | 1.47  | 0.75 | 0.58 | 0.91 |
| cg09338809 | 11 | ZBED5         | 0.000266711 | 3.48 | 4.03  | 1.16  | 0.75 | 0.59 | 0.91 |
| cg26708817 | 4  | NEUROG2       | 1.54331E-06 | 2.46 | 7.03  | 2.86  | 0.85 | 0.72 | 0.98 |
| cg11829072 | 8  | TRMT12        | 8.57162E-14 | 4.80 | 7.61  | 1.59  | 0.79 | 0.64 | 0.94 |
| cg09818520 | 1  | VPS72         | 0.000228185 | 2.80 | 4.67  | 1.67  | 0.80 | 0.65 | 0.94 |
| cg14726348 | 11 | KAT5          | 0.00153496  | 3.47 | 3.51  | 1.01  | 0.80 | 0.65 | 0.95 |
| cg19937480 | 1  | PRDX1         | 4.87052E-10 | 2.92 | 8.17  | 2.80  | 0.77 | 0.62 | 0.93 |
| cg02306127 | 19 | ZNF461        | 5.03909E-40 | 5.01 | 15.00 | 3.00  | 0.91 | 0.81 | 1.00 |
| cg14331245 | 17 | MED24         | 7.23436E-14 | 4.20 | 8.11  | 1.93  | 0.77 | 0.61 | 0.92 |
| cg10938441 | 3  | ABHD14B       | 1.62455E-38 | 3.77 | 11.55 | 3.06  | 0.77 | 0.61 | 0.92 |
| cg10897909 | 6  | CCNC          | 6.73905E-38 | 3.72 | 9.53  | 2.56  | 0.87 | 0.75 | 0.99 |
| cg13255538 | 13 | CENPJ         | 0.015719208 | 3.39 | 2.77  | 0.82  | 0.86 | 0.74 | 0.99 |
| cg19090210 | 3  | SEMA3F        | 5.20044E-39 | 2.66 | 15.49 | 5.82  | 0.82 | 0.68 | 0.96 |
| cg06649808 | 10 | SEC24C        | 0.036255731 | 2.26 | 3.27  | 1.45  | 0.83 | 0.69 | 0.96 |
| cg14174215 | 2  | KLHL23        | 0.003871217 | 2.16 | 4.66  | 2.16  | 0.81 | 0.66 | 0.95 |
| cg26322231 | 7  | ZC3HAV1L      | 0.001525739 | 2.15 | 5.17  | 2.41  | 0.75 | 0.58 | 0.91 |
| cg11596498 | 19 | ADCK4         | 0.019515076 | 2.03 | 4.08  | 2.00  | 0.76 | 0.60 | 0.92 |
| cg27071312 | 5  | KIAA0947      | 6.17507E-43 | 2.03 | 35.66 | 17.59 | 0.77 | 0.62 | 0.93 |
| cg18480233 | 2  | CRIM1         | 1.89816E-14 | 4.60 | 8.00  | 1.74  | 0.85 | 0.72 | 0.98 |
| cg07006158 | 16 | EXOSC6        | 0.000632893 | 2.04 | 5.99  | 2.93  | 0.77 | 0.62 | 0.93 |
| cg11804724 | 1  | DNAH14        | 0.011546435 | 2.42 | 3.63  | 1.50  | 0.79 | 0.64 | 0.94 |
| cg25386745 | 1  | UTP11L        | 6.90724E-39 | 2.11 | 17.86 | 8.48  | 0.80 | 0.65 | 0.95 |
| cg12565250 | 10 | EIF4EBP2      | 5.17498E-09 | 2.96 | 7.48  | 2.52  | 0.77 | 0.61 | 0.92 |

|            |    |                                                                                                                                                                                                                                                       |             |      |       |       |      |      |      |
|------------|----|-------------------------------------------------------------------------------------------------------------------------------------------------------------------------------------------------------------------------------------------------------|-------------|------|-------|-------|------|------|------|
| cg06824297 | 21 | RWDD2B                                                                                                                                                                                                                                                | 7.70314E-06 | 3.00 | 5.47  | 1.82  | 0.81 | 0.66 | 0.95 |
| cg16413687 | 12 | ALX1                                                                                                                                                                                                                                                  | 0.000409219 | 2.43 | 5.06  | 2.08  | 0.82 | 0.68 | 0.96 |
| cg05431548 | 17 | LUC7L3                                                                                                                                                                                                                                                | 2.4996E-39  | 2.20 | 19.13 | 8.72  | 0.85 | 0.71 | 0.98 |
| cg05439191 | 3  | OGG1                                                                                                                                                                                                                                                  | 8.08593E-06 | 7.14 | 3.85  | 0.54  | 0.77 | 0.61 | 0.92 |
| cg08697244 | 7  | DAGLB                                                                                                                                                                                                                                                 | 1.0463E-10  | 4.09 | 6.89  | 1.68  | 0.88 | 0.77 | 1.00 |
| cg26008390 | 19 | PLEKHG2                                                                                                                                                                                                                                               | 1.017E-08   | 3.69 | 6.33  | 1.71  | 0.81 | 0.67 | 0.95 |
| cg06591892 | 19 | AP2S1                                                                                                                                                                                                                                                 | 1.77644E-13 | 2.84 | 10.34 | 3.64  | 0.92 | 0.82 | 1.00 |
| cg07944399 | 2  | STK36; RNF25                                                                                                                                                                                                                                          | 3.46766E-05 | 4.29 | 4.16  | 0.97  | 0.82 | 0.67 | 0.96 |
| cg09782621 | 19 | ZNF444                                                                                                                                                                                                                                                | 1.79076E-43 | 3.53 | 26.64 | 7.54  | 0.81 | 0.67 | 0.96 |
| cg25674838 | 17 | DUSP3                                                                                                                                                                                                                                                 | 6.59164E-06 | 3.48 | 5.01  | 1.44  | 0.81 | 0.67 | 0.95 |
| cg23928824 | 14 | GALNTL1                                                                                                                                                                                                                                               | 3.37448E-38 | 3.26 | 11.13 | 3.41  | 0.81 | 0.66 | 0.95 |
| cg18679299 | 14 | TM9SF1                                                                                                                                                                                                                                                | 8.52534E-06 | 3.02 | 5.41  | 1.80  | 0.81 | 0.66 | 0.95 |
| cg06794268 | 19 | HNRNPUL1                                                                                                                                                                                                                                              | 2.53426E-08 | 2.68 | 7.69  | 2.87  | 0.79 | 0.64 | 0.94 |
| cg17509537 | 15 | SERF2                                                                                                                                                                                                                                                 | 0.001498757 | 2.63 | 4.23  | 1.61  | 0.79 | 0.64 | 0.94 |
| cg23359276 | 5  | PCDHGA4; PCDHGA12;<br>PCDHGA11;<br>PCDHGA11;<br>PCDHGA9; PCDHGA1;<br>PCDHGB1; PCDHGC3;<br>PCDHGB6; PCDHGB3;<br>PCDHGB7; PCDHGC3;<br>PCDHGA6; PCDHGA8;<br>PCDHGA10; PCDHGA5;<br>PCDHGB4; PCDHGA3;<br>PCDHGC3; PCDHGA2;<br>PCDHGA7; PCDHGB2;<br>PCDHGB5 | 0.000264318 | 2.50 | 5.09  | 2.03  | 0.85 | 0.72 | 0.98 |
| cg02379642 | 9  | INPP5E                                                                                                                                                                                                                                                | 1.34819E-05 | 2.42 | 6.37  | 2.63  | 0.77 | 0.61 | 0.92 |
| cg15028282 | 1  | TLL7                                                                                                                                                                                                                                                  | 1.45484E-14 | 2.40 | 13.19 | 5.50  | 0.77 | 0.62 | 0.93 |
| cg15603959 | 3  | PBRM1; GNL3                                                                                                                                                                                                                                           | 1.22444E-05 | 2.25 | 6.97  | 3.10  | 0.77 | 0.61 | 0.92 |
| cg15755662 | 7  | TTYH3                                                                                                                                                                                                                                                 | 0.003668153 | 2.17 | 4.68  | 2.16  | 0.87 | 0.75 | 0.99 |
| cg11552078 | 19 | TIMM50                                                                                                                                                                                                                                                | 4.7557E-48  | 2.31 | 47.45 | 20.52 | 0.86 | 0.73 | 0.98 |
| cg08607907 | 7  | SGCE; PEG10                                                                                                                                                                                                                                           | 3.94336E-05 | 2.42 | 5.97  | 2.46  | 0.76 | 0.60 | 0.92 |
| cg08274661 | 17 | CDC27                                                                                                                                                                                                                                                 | 6.05247E-06 | 2.86 | 5.73  | 2.00  | 0.89 | 0.78 | 1.00 |
| cg01096478 | 12 | DIP2B                                                                                                                                                                                                                                                 | 0.0001002   | 3.26 | 4.47  | 1.37  | 0.76 | 0.60 | 0.92 |
| cg23538765 | 19 | UBA2                                                                                                                                                                                                                                                  | 1.95165E-08 | 2.40 | 8.72  | 3.64  | 0.79 | 0.64 | 0.94 |
| cg22334543 | 19 | FZR1                                                                                                                                                                                                                                                  | 4.11255E-39 | 2.01 | 19.68 | 9.77  | 0.90 | 0.80 | 1.00 |
| cg18037107 | 7  | VOPP1                                                                                                                                                                                                                                                 | 0.008635084 | 2.33 | 3.92  | 1.68  | 0.79 | 0.64 | 0.94 |
| cg16477190 | 15 | BRUNOL6                                                                                                                                                                                                                                               | 3.92422E-38 | 3.47 | 10.61 | 3.06  | 0.78 | 0.62 | 0.93 |
| cg10598353 | 6  | HSPA1A; HSPA1L                                                                                                                                                                                                                                        | 0.003391091 | 2.21 | 4.60  | 2.08  | 0.78 | 0.63 | 0.93 |
| cg12077581 | 22 | PANX2                                                                                                                                                                                                                                                 | 7.50015E-06 | 2.76 | 5.83  | 2.11  | 0.84 | 0.70 | 0.97 |
| cg05388821 | 10 | FAM160B1                                                                                                                                                                                                                                              | 4.7098E-38  | 2.94 | 11.15 | 3.79  | 0.75 | 0.59 | 0.91 |
| cg03243965 | 19 | HSH2D                                                                                                                                                                                                                                                 | 1.40516E-05 | 2.28 | 6.80  | 2.98  | 0.90 | 0.79 | 1.00 |
| cg01466862 | 2  | ZC3H8                                                                                                                                                                                                                                                 | 0.010734952 | 2.98 | 3.13  | 1.05  | 0.81 | 0.66 | 0.95 |
| cg22876214 | 13 | RBM26                                                                                                                                                                                                                                                 | 3.24945E-40 | 5.12 | 15.44 | 3.01  | 0.83 | 0.69 | 0.96 |
| cg10495115 | 11 | NDUFS8                                                                                                                                                                                                                                                | 7.35224E-07 | 3.72 | 5.36  | 1.44  | 0.87 | 0.75 | 0.99 |
| cg03416888 | 20 | PSMA7; SS18L1                                                                                                                                                                                                                                         | 2.50443E-07 | 3.32 | 5.98  | 1.80  | 0.77 | 0.61 | 0.92 |
| cg05298677 | 6  | ETV7                                                                                                                                                                                                                                                  | 6.76208E-05 | 3.23 | 4.60  | 1.43  | 0.77 | 0.61 | 0.92 |
| cg03902642 | 1  | ROBLD3; UBQLN4                                                                                                                                                                                                                                        | 0.000242704 | 3.02 | 4.41  | 1.46  | 0.77 | 0.62 | 0.93 |
| cg16916914 | 17 | ITGB4                                                                                                                                                                                                                                                 | 0.0009283   | 2.80 | 4.19  | 1.50  | 0.78 | 0.62 | 0.93 |
| cg24718035 | 12 | TFCP2                                                                                                                                                                                                                                                 | 1.9608E-10  | 2.72 | 8.93  | 3.28  | 0.88 | 0.77 | 1.00 |
| cg09360495 | 17 | NEK8                                                                                                                                                                                                                                                  | 8.70436E-14 | 2.38 | 12.78 | 5.38  | 0.86 | 0.73 | 0.98 |
| cg08223129 | 12 | NEMP1                                                                                                                                                                                                                                                 | 3.48095E-11 | 2.28 | 11.51 | 5.06  | 0.76 | 0.60 | 0.92 |
| cg25300805 | 2  | NUP35                                                                                                                                                                                                                                                 | 1.37838E-12 | 2.26 | 12.74 | 5.63  | 0.77 | 0.62 | 0.93 |
| cg15992333 | 5  | REEP5                                                                                                                                                                                                                                                 | 2.15874E-09 | 2.12 | 11.12 | 5.23  | 0.86 | 0.74 | 0.99 |
| cg11820558 | 20 | CDS2; PCNA                                                                                                                                                                                                                                            | 0.001375933 | 2.52 | 4.42  | 1.75  | 0.76 | 0.60 | 0.92 |
| cg06373505 | 16 | HCFC1R1; THOC6                                                                                                                                                                                                                                        | 6.4398E-06  | 2.94 | 5.60  | 1.91  | 0.78 | 0.63 | 0.93 |

|            |    |                  |             |      |       |      |      |      |      |
|------------|----|------------------|-------------|------|-------|------|------|------|------|
| cg05541396 | 8  | PURG; WRN        | 0.020418224 | 2.47 | 3.30  | 1.34 | 0.80 | 0.65 | 0.94 |
| cg26459683 | 15 | PIAS1            | 2.76256E-05 | 3.37 | 4.74  | 1.41 | 0.83 | 0.69 | 0.96 |
| cg09698548 | 8  | CA8              | 0.015205521 | 2.43 | 3.50  | 1.44 | 0.89 | 0.77 | 1.00 |
| cg13656078 | 19 | CALM3            | 0.024795375 | 2.15 | 3.68  | 1.72 | 0.79 | 0.64 | 0.94 |
| cg20912169 | 8  | ADHFE1           | 1.69211E-07 | 2.89 | 6.70  | 2.32 | 0.83 | 0.69 | 0.97 |
| cg13793678 | 4  | OCIAD1           | 1.11547E-10 | 2.86 | 8.69  | 3.04 | 0.77 | 0.62 | 0.93 |
| cg17704177 | 6  | SFRS3            | 1.25503E-05 | 2.34 | 6.63  | 2.83 | 0.78 | 0.62 | 0.93 |
| cg04110421 | 17 | NBR2; BRCA1      | 2.66346E-08 | 2.02 | 10.88 | 5.38 | 0.77 | 0.61 | 0.92 |
| cg23065793 | 3  | SEC62            | 1.17601E-12 | 3.85 | 7.97  | 2.07 | 0.88 | 0.76 | 0.99 |
| cg00873037 | 8  | NEIL2            | 6.61998E-39 | 2.87 | 14.47 | 5.05 | 0.76 | 0.61 | 0.92 |
| cg03582798 | 7  | MLXIPL           | 3.10955E-10 | 4.51 | 6.39  | 1.42 | 0.81 | 0.66 | 0.95 |
| cg26076960 | 13 | MED4             | 1.10371E-39 | 4.14 | 14.81 | 3.58 | 0.78 | 0.62 | 0.93 |
| cg03128635 | 2  | ATOH8            | 7.00872E-07 | 4.05 | 5.15  | 1.27 | 0.82 | 0.68 | 0.96 |
| cg20824211 | 3  | DLG1             | 7.79323E-38 | 4.03 | 9.06  | 2.25 | 0.75 | 0.58 | 0.91 |
| cg18691565 | 10 | ACBD5            | 4.14588E-40 | 3.92 | 16.37 | 4.18 | 0.87 | 0.75 | 0.99 |
| cg09931891 | 16 | AP1G1            | 3.9742E-10  | 3.19 | 7.69  | 2.41 | 0.87 | 0.75 | 0.99 |
| cg20678247 | 22 | SUN2             | 0.000131387 | 2.71 | 4.99  | 1.84 | 0.82 | 0.68 | 0.96 |
| cg06951601 | 19 | ZNF799           | 0.032489311 | 2.54 | 2.99  | 1.18 | 0.79 | 0.64 | 0.94 |
| cg23812361 | 11 | E2F8             | 0.00054458  | 2.45 | 4.90  | 2.00 | 0.83 | 0.70 | 0.97 |
| cg21733597 | 15 | IDH3A            | 0.000320188 | 2.45 | 5.13  | 2.10 | 0.75 | 0.59 | 0.91 |
| cg23836487 | 2  | KANSL3           | 0.020750626 | 2.32 | 3.49  | 1.51 | 0.82 | 0.68 | 0.96 |
| cg22777309 | 6  | SCUBE3           | 3.19441E-11 | 2.17 | 12.34 | 5.68 | 0.77 | 0.62 | 0.93 |
| cg04260924 | 2  | PMS1; ORMDL1     | 1.32361E-07 | 2.16 | 9.21  | 4.27 | 0.75 | 0.59 | 0.91 |
| cg24454144 | 20 | SLC32A1          | 0.000819447 | 2.10 | 5.62  | 2.68 | 0.84 | 0.70 | 0.97 |
| cg19488260 | 11 | SPON1            | 0.009880627 | 2.09 | 4.33  | 2.07 | 0.84 | 0.70 | 0.97 |
| cg16128701 | 8  | FABP5            | 2.29107E-10 | 2.08 | 12.37 | 5.93 | 0.75 | 0.59 | 0.91 |
| cg01460882 | 12 | FAM60A           | 0.001512968 | 2.80 | 4.02  | 1.44 | 0.84 | 0.71 | 0.97 |
| cg27445106 | 1  | SNIP1            | 8.57366E-15 | 2.44 | 13.10 | 5.37 | 0.83 | 0.69 | 0.97 |
| cg13251256 | 11 | CCDC84           | 0.000316488 | 3.87 | 3.78  | 0.97 | 0.85 | 0.71 | 0.98 |
| cg01013370 | 19 | HMHA1            | 2.27152E-08 | 2.34 | 8.94  | 3.83 | 0.76 | 0.60 | 0.92 |
| cg21454656 | 22 | RBX1             | 4.45045E-09 | 3.80 | 6.40  | 1.69 | 0.89 | 0.78 | 1.00 |
| cg23912763 | 12 | PWP1             | 0.003547485 | 2.88 | 3.63  | 1.26 | 0.79 | 0.64 | 0.94 |
| cg11930768 | 3  | CRELD1           | 7.82501E-05 | 3.71 | 4.22  | 1.14 | 0.81 | 0.66 | 0.95 |
| cg09516764 | 12 | EP400NL          | 4.08203E-06 | 3.12 | 5.50  | 1.76 | 0.88 | 0.76 | 0.99 |
| cg17585343 | 11 | HSD17B12         | 0.000329374 | 2.58 | 4.86  | 1.88 | 0.77 | 0.62 | 0.93 |
| cg18962915 | 19 | TSEN34           | 2.14899E-38 | 5.71 | 9.93  | 1.74 | 0.77 | 0.62 | 0.93 |
| cg06208824 | 14 | PSMC6            | 0.007939408 | 2.08 | 4.48  | 2.15 | 0.77 | 0.61 | 0.92 |
| cg23912878 | 14 | MBIP             | 1.3742E-13  | 2.18 | 14.27 | 6.55 | 0.83 | 0.69 | 0.96 |
| cg05020625 | 6  | TTBK1            | 1.54343E-09 | 3.85 | 6.57  | 1.71 | 0.81 | 0.67 | 0.95 |
| cg21952419 | 13 | INTS6            | 8.91538E-14 | 5.58 | 7.19  | 1.29 | 0.76 | 0.60 | 0.92 |
| cg03235119 | 5  | ZNF346           | 8.77316E-41 | 4.20 | 17.94 | 4.27 | 0.81 | 0.67 | 0.95 |
| cg06325700 | 2  | FAM228B; SF3B6   | 1.92591E-06 | 3.98 | 4.96  | 1.25 | 0.77 | 0.62 | 0.93 |
| cg12099727 | 7  | WBSCR22; DNAJC30 | 5.3032E-05  | 3.89 | 4.23  | 1.09 | 0.78 | 0.62 | 0.93 |
| cg03630364 | 7  | NUB1             | 2.40344E-05 | 3.58 | 4.61  | 1.29 | 0.75 | 0.59 | 0.91 |
| cg00584636 | 2  | DNPEP            | 4.28856E-07 | 3.30 | 5.87  | 1.78 | 0.86 | 0.74 | 0.99 |
| cg14922223 | 1  | NUF2; RGS5       | 0.038946089 | 3.29 | 2.45  | 0.75 | 0.79 | 0.64 | 0.94 |
| cg07663813 | 8  | ZNF704           | 0.000463981 | 2.85 | 4.38  | 1.54 | 0.78 | 0.62 | 0.93 |
| cg05188158 | 17 | METT10D          | 7.32575E-06 | 2.84 | 5.71  | 2.01 | 0.93 | 0.84 | 1.00 |
| cg23849946 | 9  | KDM4C            | 0.000127526 | 2.68 | 5.04  | 1.88 | 0.76 | 0.60 | 0.92 |
| cg12711743 | 1  | LRRC8C; FLJ27354 | 0.0004474   | 2.68 | 4.61  | 1.72 | 0.99 | 0.95 | 1.00 |
| cg04029586 | 6  | EHMT2            | 0.026922148 | 2.15 | 3.63  | 1.69 | 0.77 | 0.61 | 0.92 |
| cg25421835 | 5  | CNOT8            | 0.001258175 | 2.59 | 4.34  | 1.68 | 0.75 | 0.59 | 0.91 |
| cg20689859 | 2  | EHBP1            | 0.000171095 | 2.88 | 4.67  | 1.62 | 0.75 | 0.59 | 0.91 |
| cg11535522 | 22 | PPPDE2; XRCC6    | 4.69422E-07 | 4.01 | 5.26  | 1.31 | 0.75 | 0.59 | 0.91 |

|            |    |                 |             |      |       |       |      |      |      |
|------------|----|-----------------|-------------|------|-------|-------|------|------|------|
| cg16199144 | 15 | TRIP4; KIAA0101 | 1.00958E-07 | 2.40 | 8.16  | 3.40  | 0.80 | 0.65 | 0.95 |
| cg05348768 | 1  | CYB5R1          | 4.08353E-05 | 2.66 | 5.46  | 2.05  | 0.85 | 0.72 | 0.98 |
| cg19896040 | 22 | MED15           | 0.034267111 | 2.48 | 3.03  | 1.22  | 0.77 | 0.61 | 0.92 |
| cg05009619 | 7  | NDUFB2          | 0.017538677 | 2.12 | 3.93  | 1.85  | 0.83 | 0.69 | 0.96 |
| cg05709063 | 5  | CENPK; PPWD1    | 3.44577E-38 | 3.78 | 10.46 | 2.77  | 0.75 | 0.59 | 0.91 |
| cg04018299 | 1  | ADAM15          | 0.00973411  | 2.72 | 3.38  | 1.24  | 0.78 | 0.63 | 0.93 |
| cg12630974 | 1  | MED18           | 3.32034E-12 | 7.03 | 6.22  | 0.88  | 0.75 | 0.59 | 0.91 |
| cg27566521 | 1  | CTNNBIP1        | 0.00618475  | 2.32 | 4.09  | 1.76  | 0.81 | 0.67 | 0.96 |
| cg07532155 | 1  | PTPRF           | 2.91983E-09 | 3.36 | 6.97  | 2.08  | 0.86 | 0.73 | 0.98 |
| cg17223643 | 2  | TTC7A; MCFD2    | 0.045526237 | 2.11 | 3.38  | 1.60  | 0.75 | 0.58 | 0.91 |
| cg24160036 | 20 | RBM38           | 0.000187568 | 2.10 | 6.35  | 3.03  | 0.84 | 0.71 | 0.97 |
| cg02658739 | 5  | TNPO1           | 7.22562E-06 | 2.54 | 6.30  | 2.48  | 0.78 | 0.62 | 0.93 |
| cg14686008 | 11 | PDHX; APIP      | 0.013836581 | 3.80 | 2.67  | 0.70  | 0.81 | 0.67 | 0.95 |
| cg20784314 | 20 | YWHAB           | 1.26593E-12 | 2.36 | 12.04 | 5.10  | 0.85 | 0.71 | 0.98 |
| cg10106268 | 4  | SLC30A9         | 5.02346E-38 | 6.64 | 8.58  | 1.29  | 0.88 | 0.76 | 1.00 |
| cg00746864 | 17 | PITPNC1         | 4.0854E-39  | 6.10 | 11.86 | 1.94  | 0.80 | 0.66 | 0.95 |
| cg17319142 | 2  | C1QL2           | 1.8096E-38  | 5.09 | 10.42 | 2.05  | 0.78 | 0.62 | 0.93 |
| cg18957973 | 2  | KIAA1310        | 1.55571E-10 | 4.68 | 6.42  | 1.37  | 0.79 | 0.64 | 0.94 |
| cg13055374 | 1  | SSBP3           | 1.44987E-39 | 3.78 | 14.90 | 3.94  | 0.90 | 0.80 | 1.00 |
| cg04917181 | 8  | TSPYL5          | 6.00767E-11 | 3.64 | 7.45  | 2.05  | 0.85 | 0.72 | 0.98 |
| cg15356195 | 7  | ACTB            | 0.000673785 | 3.57 | 3.71  | 1.04  | 0.84 | 0.71 | 0.97 |
| cg17777561 | 17 | FXR2; SHBG      | 0.001370048 | 2.98 | 3.89  | 1.31  | 0.75 | 0.59 | 0.91 |
| cg25417344 | 19 | MRI1            | 0.005258628 | 2.87 | 3.49  | 1.21  | 0.85 | 0.72 | 0.98 |
| cg20150565 | 20 | ZNFX1           | 1.25136E-41 | 2.62 | 25.01 | 9.56  | 0.84 | 0.71 | 0.98 |
| cg14351634 | 17 | WRAP53; TP53    | 6.37943E-05 | 2.54 | 5.54  | 2.18  | 0.75 | 0.59 | 0.91 |
| cg05367846 | 22 | MICAL3          | 1.63558E-45 | 2.16 | 42.42 | 19.63 | 0.96 | 0.89 | 1.00 |
| cg13207467 | 1  | CSRP1           | 0.01866122  | 2.15 | 3.83  | 1.78  | 0.78 | 0.62 | 0.93 |
| cg27269921 | 22 | MN1             | 0.007478555 | 2.10 | 4.46  | 2.12  | 0.75 | 0.58 | 0.91 |
| cg25987077 | 20 | POFUT1; PLAGL2  | 0.014515649 | 2.10 | 4.09  | 1.95  | 0.76 | 0.60 | 0.92 |
| cg27392024 | 18 | CCDC11          | 0.024234669 | 2.96 | 2.81  | 0.95  | 0.75 | 0.59 | 0.91 |
| cg11416243 | 10 | CUGBP2          | 0.007922148 | 2.13 | 4.35  | 2.04  | 0.77 | 0.61 | 0.92 |
| cg13876048 | 2  | PQLC3           | 0.012953533 | 2.31 | 3.74  | 1.62  | 0.82 | 0.68 | 0.96 |
| cg00101453 | 22 | GATSL3          | 0.000639594 | 3.14 | 4.00  | 1.27  | 0.76 | 0.60 | 0.92 |
| cg03771878 | 16 | PHKG2           | 2.42235E-05 | 2.48 | 6.01  | 2.42  | 0.77 | 0.61 | 0.92 |
| cg06891548 | 1  | GGPS1; ARID4B   | 2.33443E-38 | 6.90 | 9.48  | 1.37  | 0.88 | 0.77 | 1.00 |
| cg08863848 | 7  | HOXA11          | 3.05412E-09 | 4.52 | 5.97  | 1.32  | 0.83 | 0.70 | 0.97 |
| cg01849260 | 5  | TBCA            | 2.68952E-39 | 3.41 | 14.64 | 4.30  | 0.82 | 0.68 | 0.96 |
| cg07408690 | 9  | ZFAND5          | 0.048697813 | 2.17 | 3.23  | 1.49  | 0.79 | 0.64 | 0.94 |
| cg16605745 | 12 | RPAP3           | 1.46777E-42 | 3.52 | 24.20 | 6.87  | 0.83 | 0.70 | 0.97 |
| cg10892375 | 14 | RAB2B; TOX4     | 0.000842316 | 2.16 | 5.41  | 2.50  | 0.82 | 0.68 | 0.96 |
| cg20124620 | 19 | GPR108          | 0.000521807 | 3.27 | 3.97  | 1.21  | 0.78 | 0.63 | 0.94 |
| cg06044117 | 11 | FAM76B; CEP57   | 1.91395E-08 | 3.78 | 6.11  | 1.62  | 0.75 | 0.59 | 0.91 |
| cg27537561 | 12 | VDR             | 6.31386E-08 | 3.19 | 6.47  | 2.03  | 0.78 | 0.63 | 0.93 |
| cg00044463 | 1  | GLT25D2         | 2.86959E-38 | 2.85 | 12.15 | 4.27  | 0.79 | 0.64 | 0.94 |
| cg21226485 | 18 | MYL12B          | 0.002273408 | 2.85 | 3.83  | 1.34  | 0.80 | 0.66 | 0.95 |
| cg26886427 | 19 | YIPF2           | 6.25909E-12 | 2.84 | 9.48  | 3.34  | 0.76 | 0.60 | 0.92 |
| cg02891574 | 19 | ZNF446          | 1.39225E-10 | 2.43 | 10.17 | 4.19  | 0.75 | 0.59 | 0.91 |
| cg26831488 | 11 | RBM7            | 0.027317358 | 2.42 | 3.22  | 1.33  | 0.78 | 0.63 | 0.93 |
| cg07801681 | 16 | ARL6IP1         | 0.005783243 | 2.29 | 4.18  | 1.82  | 0.82 | 0.68 | 0.96 |
| cg16395712 | 17 | NDEL1           | 0.025207335 | 2.22 | 3.54  | 1.59  | 0.78 | 0.63 | 0.94 |
| cg20573820 | 6  | SYNGAP1         | 0.0469218   | 2.21 | 3.19  | 1.44  | 0.87 | 0.75 | 0.99 |
| cg10531688 | 3  | THPO; CHR1      | 1.41353E-39 | 2.17 | 20.41 | 9.42  | 0.82 | 0.69 | 0.96 |
| cg07099627 | 19 | LPPR2           | 0.000835114 | 2.15 | 5.45  | 2.53  | 0.78 | 0.62 | 0.93 |
| cg06151988 | 20 | DLGAP4          | 6.01797E-39 | 3.53 | 13.29 | 3.77  | 0.79 | 0.64 | 0.94 |

|            |    |                |             |      |       |      |      |      |      |
|------------|----|----------------|-------------|------|-------|------|------|------|------|
| cg13096688 | 17 | PLEKHM1        | 0.004073094 | 2.09 | 4.83  | 2.31 | 0.76 | 0.60 | 0.92 |
| cg17322839 | 9  | TMOD1          | 2.42974E-39 | 4.44 | 13.48 | 3.03 | 0.81 | 0.66 | 0.95 |
| cg09848695 | 5  | FAM172A        | 1.92608E-06 | 3.02 | 5.82  | 1.93 | 0.83 | 0.69 | 0.96 |
| cg19156395 | 1  | PEF1           | 5.05812E-08 | 2.21 | 9.29  | 4.20 | 0.75 | 0.59 | 0.91 |
| cg18721249 | 7  | CAV1           | 7.30266E-39 | 3.56 | 12.96 | 3.64 | 0.77 | 0.61 | 0.92 |
| cg02464895 | 19 | RPS9           | 1.35102E-06 | 3.37 | 5.51  | 1.64 | 0.81 | 0.66 | 0.95 |
| cg27306034 | 1  | FAM189B        | 0.000324328 | 2.29 | 5.47  | 2.39 | 0.80 | 0.65 | 0.95 |
| cg17080709 | 1  | GNAI3          | 1.31635E-39 | 3.48 | 15.52 | 4.46 | 0.87 | 0.75 | 0.99 |
| cg01181758 | 16 | OGFOD1; NUDT21 | 6.90224E-13 | 2.29 | 12.71 | 5.54 | 0.81 | 0.67 | 0.96 |
| cg10865087 | 10 | BICC1          | 2.21961E-13 | 2.27 | 13.27 | 5.85 | 0.75 | 0.58 | 0.91 |
| cg12072333 | 7  | WDR91          | 3.16126E-05 | 5.96 | 3.75  | 0.63 | 0.83 | 0.70 | 0.97 |
| cg14825076 | 12 | RNF41          | 0.048370017 | 2.16 | 3.25  | 1.50 | 0.78 | 0.63 | 0.93 |
| cg00048823 | 14 | OSGEP; APEX1   | 6.2549E-05  | 3.79 | 4.24  | 1.12 | 0.83 | 0.69 | 0.97 |
| cg15708019 | 4  | WDR19          | 0.000585167 | 2.86 | 4.29  | 1.50 | 0.78 | 0.63 | 0.93 |
| cg21577705 | 19 | MBOAT7         | 0.018117597 | 2.19 | 3.78  | 1.73 | 0.76 | 0.60 | 0.92 |
| cg04719537 | 11 | CNTN5          | 6.23088E-11 | 3.37 | 7.80  | 2.31 | 0.80 | 0.65 | 0.95 |
| cg17143565 | 17 | SLFN5          | 2.94018E-38 | 3.30 | 11.28 | 3.42 | 0.78 | 0.63 | 0.94 |
| cg14197576 | 6  | KIF13A         | 0.003478912 | 2.72 | 3.80  | 1.40 | 0.75 | 0.59 | 0.91 |
| cg07574621 | 3  | XPC; LSM3      | 0.003833611 | 2.61 | 3.88  | 1.48 | 0.75 | 0.59 | 0.91 |
| cg07587588 | 8  | TPD52          | 2.60266E-41 | 2.56 | 24.25 | 9.46 | 0.75 | 0.59 | 0.91 |
| cg02328010 | 1  | RYR2           | 1.35098E-07 | 2.44 | 7.90  | 3.23 | 0.76 | 0.60 | 0.92 |
| cg06490744 | 11 | ST3GAL4        | 0.000245033 | 2.41 | 5.31  | 2.20 | 0.76 | 0.60 | 0.92 |
| cg19425870 | 11 | STIM1          | 0.000499898 | 2.39 | 5.07  | 2.12 | 0.82 | 0.68 | 0.96 |
| cg24668364 | 17 | UBB            | 3.49171E-06 | 2.29 | 7.30  | 3.19 | 0.85 | 0.72 | 0.98 |
| cg01009697 | 9  | NTRK2          | 2.3269E-08  | 2.25 | 9.39  | 4.18 | 0.80 | 0.65 | 0.95 |
| cg06808983 | 17 | G6PC3          | 1.29371E-07 | 2.24 | 8.77  | 3.91 | 0.89 | 0.78 | 1.00 |
| cg06639387 | 1  | TRIM11         | 2.72584E-05 | 2.15 | 7.05  | 3.28 | 0.76 | 0.60 | 0.92 |
| cg06383531 | 19 | HDGF2          | 7.39895E-05 | 2.12 | 6.69  | 3.15 | 0.80 | 0.65 | 0.94 |
| cg05843800 | 3  | SUMF1          | 0.000381585 | 2.12 | 5.94  | 2.81 | 0.76 | 0.60 | 0.92 |
| cg24976104 | 22 | PRR5; ARHGAP8  | 0.040410452 | 2.14 | 3.40  | 1.59 | 0.79 | 0.64 | 0.94 |
| cg02237342 | 22 | ADORA2A        | 8.12043E-06 | 2.61 | 6.09  | 2.33 | 0.86 | 0.74 | 0.99 |
| cg14185025 | 14 | EML1           | 6.88688E-08 | 3.30 | 6.31  | 1.91 | 0.82 | 0.68 | 0.96 |
| cg08393660 | 6  | RNF8           | 0.000291196 | 3.14 | 4.25  | 1.36 | 0.81 | 0.67 | 0.95 |
| cg16331823 | 6  | FLOT1; IER3    | 4.32835E-07 | 2.55 | 7.18  | 2.81 | 0.75 | 0.58 | 0.91 |
| cg17182540 | 12 | DDX55          | 0.001586118 | 2.82 | 3.98  | 1.41 | 0.82 | 0.68 | 0.96 |
| cg24591761 | 15 | MYO9A; SENP8   | 0.008594083 | 2.36 | 3.87  | 1.64 | 0.77 | 0.61 | 0.92 |
| cg10743145 | 19 | ERCC1          | 5.90301E-07 | 3.23 | 5.86  | 1.81 | 0.83 | 0.69 | 0.97 |
| cg20721338 | 15 | PML            | 0.002020682 | 2.18 | 4.94  | 2.26 | 0.79 | 0.64 | 0.94 |
| cg27026673 | 2  | MAP4K3         | 8.25333E-39 | 4.08 | 12.18 | 2.99 | 0.80 | 0.66 | 0.95 |
| cg04677871 | 16 | ZNF821         | 0.000231412 | 2.36 | 5.44  | 2.30 | 0.78 | 0.63 | 0.93 |
| cg07798595 | 1  | SEP15; HS2ST1  | 2.76044E-09 | 2.29 | 9.91  | 4.33 | 0.78 | 0.62 | 0.93 |
| cg11804248 | 15 | GALK2; COPS2   | 4.47999E-06 | 4.15 | 4.68  | 1.13 | 0.77 | 0.61 | 0.93 |
| cg15059389 | 1  | MIIP           | 9.40956E-38 | 4.80 | 8.34  | 1.74 | 0.84 | 0.71 | 0.97 |
| cg22865986 | 2  | FBXO36; TRIP12 | 8.65829E-11 | 4.25 | 6.80  | 1.60 | 0.78 | 0.63 | 0.93 |
| cg08646372 | 13 | USPL1          | 5.31857E-12 | 3.24 | 8.56  | 2.64 | 0.79 | 0.64 | 0.94 |
| cg18270629 | 11 | PAX6           | 0.000320617 | 3.19 | 4.18  | 1.31 | 0.84 | 0.70 | 0.97 |
| cg19982658 | 14 | AP1G2          | 0.036813354 | 2.84 | 2.70  | 0.95 | 0.82 | 0.68 | 0.96 |
| cg15589156 | 11 | RAB31L1        | 0.008674167 | 2.75 | 3.39  | 1.23 | 0.80 | 0.65 | 0.94 |
| cg17147121 | 19 | ZNF836         | 1.20614E-07 | 2.54 | 7.62  | 2.99 | 0.79 | 0.64 | 0.94 |
| cg02205181 | 10 | NFKB2          | 8.27296E-15 | 2.38 | 13.52 | 5.68 | 0.82 | 0.68 | 0.96 |
| cg01538659 | 1  | POGZ           | 0.001706049 | 2.28 | 4.77  | 2.09 | 0.86 | 0.74 | 0.99 |
| cg09166659 | 1  | SAMD11         | 0.009586367 | 2.25 | 4.00  | 1.78 | 0.76 | 0.60 | 0.92 |
| cg13792025 | 7  | RABGEF1        | 0.00532253  | 2.50 | 3.88  | 1.55 | 0.80 | 0.65 | 0.95 |
| cg26389465 | 11 | PTS            | 0.002087201 | 3.41 | 3.45  | 1.01 | 0.81 | 0.67 | 0.96 |



|            |    |                |             |      |       |      |      |      |      |
|------------|----|----------------|-------------|------|-------|------|------|------|------|
| cg13275176 | 2  | SEMA4C         | 1.95171E-43 | 3.10 | 28.08 | 9.05 | 0.84 | 0.70 | 0.97 |
| cg08034643 | 17 | AKAP1          | 0.013920493 | 2.38 | 3.60  | 1.51 | 0.78 | 0.63 | 0.93 |
| cg00546594 | 21 | ATP5O          | 0.025066169 | 2.14 | 3.69  | 1.73 | 0.75 | 0.58 | 0.91 |
| cg26211360 | 12 | LRRC43         | 7.13839E-10 | 2.28 | 10.45 | 4.58 | 0.79 | 0.64 | 0.94 |
| cg21695485 | 11 | RHOD           | 9.70146E-40 | 3.01 | 17.00 | 5.64 | 0.76 | 0.60 | 0.92 |
| cg20910303 | 4  | SLC10A7        | 5.03836E-10 | 2.61 | 9.05  | 3.47 | 0.80 | 0.65 | 0.95 |
| cg26298722 | 19 | DMPK           | 0.00695983  | 2.33 | 4.01  | 1.72 | 0.76 | 0.60 | 0.92 |
| cg08048517 | 12 | KIAA0528       | 1.02777E-37 | 7.55 | 7.50  | 0.99 | 0.79 | 0.64 | 0.94 |
| cg09453752 | 5  | MARCH3         | 7.28564E-05 | 3.56 | 4.33  | 1.22 | 0.83 | 0.70 | 0.97 |
| cg07231649 | 1  | VPS45          | 0.001644728 | 3.28 | 3.60  | 1.10 | 0.76 | 0.60 | 0.92 |
| cg20419523 | 4  | RASGEF1B       | 4.44519E-38 | 3.27 | 10.68 | 3.26 | 0.80 | 0.65 | 0.95 |
| cg23473726 | 19 | ZNF324         | 0.018774771 | 2.90 | 2.96  | 1.02 | 0.90 | 0.79 | 1.00 |
| cg08073882 | 4  | JAKMIP1        | 0.020573513 | 2.37 | 3.42  | 1.44 | 0.81 | 0.67 | 0.96 |
| cg13472656 | 22 | ADRBK2         | 6.31011E-40 | 2.37 | 20.40 | 8.62 | 0.82 | 0.68 | 0.96 |
| cg01070148 | 19 | BCL3           | 0.000410625 | 2.19 | 5.67  | 2.59 | 0.77 | 0.62 | 0.93 |
| cg13714459 | 15 | IREB2          | 0.021426332 | 2.13 | 3.81  | 1.79 | 0.81 | 0.66 | 0.95 |
| cg01966344 | 22 | DEPDC5         | 5.86883E-09 | 2.90 | 7.58  | 2.62 | 0.88 | 0.76 | 0.99 |
| cg14701410 | 12 | SLC4A8         | 0.000711579 | 4.97 | 3.23  | 0.65 | 0.84 | 0.71 | 0.97 |
| cg24105243 | 3  | OXSM; NGLY1    | 0.034168852 | 2.74 | 2.81  | 1.03 | 0.77 | 0.61 | 0.92 |
| cg06658864 | 19 | ZNF700         | 0.010037357 | 2.54 | 3.55  | 1.40 | 0.86 | 0.73 | 0.98 |
| cg19622755 | 2  | MCFD2; TTC7A   | 0.000435326 | 2.17 | 5.71  | 2.64 | 0.84 | 0.70 | 0.97 |
| cg10088519 | 17 | VAMP2          | 0.023250635 | 2.13 | 3.74  | 1.75 | 0.88 | 0.76 | 0.99 |
| cg10729426 | 19 | ZNF549         | 1.25603E-07 | 2.18 | 9.09  | 4.16 | 0.79 | 0.64 | 0.94 |
| cg12266551 | 19 | TOMM40         | 0.011057067 | 2.19 | 4.05  | 1.86 | 0.76 | 0.60 | 0.92 |
| cg27249422 | 17 | DHX58          | 0.000703914 | 2.68 | 4.44  | 1.66 | 0.79 | 0.64 | 0.94 |
| cg17525428 | 19 | SHANK1         | 3.3055E-11  | 3.19 | 8.26  | 2.59 | 0.83 | 0.70 | 0.97 |
| cg19125323 | 17 | SFRS2          | 0.016035371 | 2.47 | 3.41  | 1.38 | 0.76 | 0.60 | 0.92 |
| cg25680942 | 5  | NREP           | 1.54648E-11 | 2.96 | 8.93  | 3.02 | 0.81 | 0.66 | 0.95 |
| cg12749132 | 1  | C2CD4D         | 2.81952E-06 | 5.75 | 4.27  | 0.74 | 0.87 | 0.75 | 0.99 |
| cg14260522 | 7  | BAZ1B          | 2.61777E-41 | 4.51 | 19.00 | 4.21 | 0.83 | 0.69 | 0.97 |
| cg27225571 | 6  | MRPL18; TCP1   | 5.06009E-07 | 3.89 | 5.32  | 1.37 | 0.80 | 0.66 | 0.95 |
| cg00370820 | 22 | GTPBP1         | 3.11116E-09 | 3.56 | 6.71  | 1.89 | 0.80 | 0.66 | 0.95 |
| cg07983652 | 1  | HDGF           | 6.25949E-38 | 3.40 | 9.99  | 2.94 | 0.77 | 0.62 | 0.93 |
| cg18172830 | 17 | WFIKKN2        | 1.87522E-38 | 3.22 | 12.10 | 3.76 | 0.75 | 0.59 | 0.91 |
| cg21145136 | 15 | SH3GL3         | 0.002515513 | 3.03 | 3.64  | 1.20 | 0.80 | 0.66 | 0.95 |
| cg01849156 | 20 | CDK5RAP1       | 0.000577457 | 2.97 | 4.18  | 1.41 | 0.75 | 0.58 | 0.91 |
| cg07203258 | 10 | DDX50          | 1.08356E-05 | 2.92 | 5.48  | 1.88 | 0.79 | 0.64 | 0.94 |
| cg12858895 | 14 | SLC8A3         | 7.62074E-39 | 2.68 | 14.80 | 5.52 | 0.84 | 0.71 | 0.97 |
| cg06749592 | 2  | EFHD1          | 0.01663186  | 2.54 | 3.32  | 1.30 | 0.75 | 0.58 | 0.91 |
| cg23687194 | 6  | ID4            | 1.37492E-06 | 2.53 | 6.87  | 2.71 | 0.85 | 0.72 | 0.98 |
| cg00696023 | 3  | GMPS           | 0.001048519 | 2.38 | 4.77  | 2.00 | 0.79 | 0.64 | 0.94 |
| cg10583297 | 15 | DUOX1          | 2.8746E-07  | 2.32 | 8.12  | 3.50 | 0.75 | 0.59 | 0.91 |
| cg17960268 | 9  | CBWD1          | 1.09072E-13 | 2.29 | 13.34 | 5.82 | 0.85 | 0.72 | 0.98 |
| cg20648939 | 18 | RNMT           | 0.045635078 | 2.20 | 3.22  | 1.46 | 0.78 | 0.62 | 0.93 |
| cg07596314 | 3  | SHISA5         | 4.82597E-07 | 2.19 | 8.50  | 3.87 | 0.80 | 0.65 | 0.94 |
| cg16443970 | 10 | PAX2           | 0.005608551 | 2.03 | 4.83  | 2.37 | 0.76 | 0.60 | 0.92 |
| cg00391481 | 8  | FAM91A1        | 5.75888E-06 | 3.23 | 5.28  | 1.63 | 0.75 | 0.59 | 0.91 |
| cg19849093 | 2  | GALNT14        | 4.29662E-07 | 2.66 | 6.91  | 2.60 | 0.75 | 0.59 | 0.91 |
| cg15048437 | 19 | ZNF260         | 0.003701207 | 2.34 | 4.30  | 1.84 | 0.80 | 0.66 | 0.95 |
| cg11039361 | 11 | MARK2          | 1.51882E-11 | 2.43 | 10.89 | 4.49 | 0.76 | 0.60 | 0.92 |
| cg14114033 | 7  | SYPL1          | 0.00010394  | 2.37 | 5.73  | 2.41 | 0.80 | 0.65 | 0.94 |
| cg00765710 | 1  | PGBD2          | 2.75948E-40 | 4.48 | 16.20 | 3.61 | 0.95 | 0.87 | 1.00 |
| cg04010086 | 21 | DSCR3          | 0.020892751 | 4.03 | 2.46  | 0.61 | 0.82 | 0.68 | 0.96 |
| cg05360949 | 19 | BCKDHA; EXOSC5 | 1.27089E-14 | 2.58 | 12.13 | 4.70 | 0.82 | 0.69 | 0.96 |

|            |    |                        |             |      |       |       |      |      |      |
|------------|----|------------------------|-------------|------|-------|-------|------|------|------|
| cg12904950 | 1  | NPHP4                  | 4.83569E-38 | 4.40 | 9.48  | 2.16  | 0.81 | 0.66 | 0.95 |
| cg16277479 | 1  | PDPN                   | 3.35642E-08 | 2.77 | 7.40  | 2.67  | 0.75 | 0.58 | 0.91 |
| cg27332938 | 10 | ZNF511; TUBGCP2        | 3.80537E-08 | 2.09 | 10.16 | 4.85  | 0.81 | 0.67 | 0.95 |
| cg15079565 | 19 | TYK2                   | 3.62532E-06 | 3.58 | 5.08  | 1.42  | 0.77 | 0.62 | 0.93 |
| cg23363832 | 3  | RBP1                   | 1.48291E-05 | 2.40 | 6.39  | 2.66  | 0.81 | 0.67 | 0.95 |
| cg15378253 | 2  | FARP2                  | 5.29713E-44 | 4.53 | 25.79 | 5.70  | 0.89 | 0.78 | 1.00 |
| cg14676825 | 17 | PROCA1                 | 2.4532E-39  | 3.30 | 14.97 | 4.54  | 0.77 | 0.61 | 0.92 |
| cg17015511 | 11 | RDX                    | 4.47107E-06 | 3.03 | 5.58  | 1.84  | 0.78 | 0.63 | 0.93 |
| cg22782268 | 13 | GPC5                   | 0.000278877 | 2.60 | 4.89  | 1.88  | 0.78 | 0.63 | 0.93 |
| cg13880677 | 11 | ATHL1                  | 0.000813531 | 2.41 | 4.82  | 2.00  | 0.78 | 0.63 | 0.93 |
| cg26185926 | 15 | BLOC1S6                | 0.032378823 | 2.39 | 3.15  | 1.32  | 0.81 | 0.67 | 0.95 |
| cg14926717 | 14 | FLJ43390               | 6.13245E-07 | 2.36 | 7.68  | 3.25  | 0.81 | 0.66 | 0.95 |
| cg26509139 | 1  | MRPL20                 | 5.76974E-07 | 2.31 | 7.90  | 3.42  | 0.79 | 0.64 | 0.94 |
| cg21377598 | 22 | DGCR6L                 | 0.002131259 | 2.25 | 4.73  | 2.10  | 0.80 | 0.66 | 0.95 |
| cg04607235 | 12 | APOLD1                 | 4.17352E-05 | 2.24 | 6.50  | 2.90  | 0.75 | 0.59 | 0.91 |
| cg21283714 | 1  | TMCC2                  | 0.035096066 | 2.13 | 3.50  | 1.65  | 0.76 | 0.60 | 0.92 |
| cg21127184 | 4  | RWDD4A                 | 1.06861E-44 | 2.07 | 41.24 | 19.88 | 0.78 | 0.63 | 0.94 |
| cg18029778 | 7  | MLL5                   | 7.55438E-41 | 3.14 | 20.25 | 6.45  | 0.79 | 0.64 | 0.94 |
| cg17576266 | 5  | MATR3                  | 0.002049914 | 2.76 | 3.96  | 1.44  | 0.83 | 0.69 | 0.96 |
| cg25607294 | 22 | GCAT                   | 2.46923E-07 | 2.36 | 7.99  | 3.38  | 0.79 | 0.64 | 0.94 |
| cg05730369 | 12 | MON2                   | 5.40025E-10 | 2.35 | 10.17 | 4.34  | 0.83 | 0.69 | 0.97 |
| cg05031521 | 16 | SOX8                   | 4.55656E-38 | 3.10 | 10.91 | 3.52  | 0.85 | 0.73 | 0.98 |
| cg00285026 | 16 | TMEM159; DNAH3         | 0.043231339 | 2.02 | 3.59  | 1.77  | 0.80 | 0.65 | 0.95 |
| cg15963901 | 7  | VWC2                   | 2.02212E-07 | 2.27 | 8.44  | 3.71  | 0.77 | 0.61 | 0.92 |
| cg05808399 | 5  | TRIM23; TRAPPC13       | 2.1828E-08  | 3.12 | 6.84  | 2.19  | 0.80 | 0.65 | 0.95 |
| cg18453441 | 7  | CDK6                   | 0.003945492 | 2.44 | 4.10  | 1.68  | 0.76 | 0.60 | 0.92 |
| cg13849422 | 20 | FAM83D                 | 1.09184E-05 | 2.29 | 6.85  | 2.99  | 0.83 | 0.70 | 0.97 |
| cg00221525 | 16 | ZNF668                 | 1.03031E-38 | 2.62 | 14.51 | 5.54  | 0.90 | 0.80 | 1.00 |
| cg13298682 | 22 | ZNRF3                  | 1.69548E-41 | 2.36 | 26.32 | 11.14 | 0.81 | 0.67 | 0.95 |
| cg07696310 | 16 | MAP1LC3B; FBXO31       | 9.49015E-05 | 2.37 | 5.78  | 2.44  | 0.85 | 0.71 | 0.98 |
| cg14579362 | 19 | RPS16                  | 0.000628523 | 2.85 | 4.28  | 1.50  | 0.81 | 0.67 | 0.95 |
| cg05192759 | 19 | ANKRD24                | 4.38007E-08 | 2.25 | 9.12  | 4.05  | 0.85 | 0.73 | 0.98 |
| cg12996119 | 17 | AATF                   | 0.001939598 | 2.50 | 4.31  | 1.73  | 0.80 | 0.66 | 0.95 |
| cg25520999 | 1  | UCK2                   | 0.002851101 | 2.28 | 4.54  | 1.99  | 0.78 | 0.62 | 0.93 |
| cg00978521 | 2  | CDC42EP3               | 8.24991E-05 | 3.26 | 4.52  | 1.39  | 0.85 | 0.72 | 0.98 |
| cg14786398 | 19 | ZNF543                 | 0.038055322 | 2.27 | 3.22  | 1.42  | 0.81 | 0.67 | 0.96 |
| cg16414762 | 1  | CAMTA1                 | 1.06227E-38 | 6.56 | 10.54 | 1.61  | 0.79 | 0.64 | 0.94 |
| cg23258678 | 1  | NR5A2                  | 7.69662E-40 | 3.43 | 16.35 | 4.76  | 0.78 | 0.62 | 0.93 |
| cg12746717 | 2  | HDAC4                  | 0.003508901 | 2.53 | 4.01  | 1.58  | 0.84 | 0.71 | 0.97 |
| cg26161170 | 6  | RPP21                  | 2.0695E-13  | 2.11 | 14.91 | 7.08  | 0.84 | 0.71 | 0.97 |
| cg02126098 | 17 | MAP3K3                 | 0.002236493 | 3.32 | 3.48  | 1.05  | 0.79 | 0.64 | 0.94 |
| cg25713309 | 19 | OCEL1                  | 0.034528036 | 2.25 | 3.31  | 1.47  | 0.75 | 0.58 | 0.91 |
| cg05889842 | 3  | FAM194A                | 0.002164499 | 2.73 | 3.97  | 1.46  | 0.76 | 0.60 | 0.92 |
| cg27431596 | 1  | ZNF697                 | 0.013647647 | 2.29 | 3.74  | 1.63  | 0.79 | 0.64 | 0.94 |
| cg03847009 | 21 | SYNJ1                  | 5.57399E-05 | 2.13 | 6.78  | 3.18  | 0.76 | 0.60 | 0.92 |
| cg18727717 | 2  | ERLEC1; GPR75;<br>ASB3 | 0.002477617 | 2.82 | 3.82  | 1.35  | 0.85 | 0.72 | 0.98 |
| cg12518410 | 2  | SH3RF3                 | 2.44277E-07 | 4.86 | 4.99  | 1.03  | 0.79 | 0.64 | 0.94 |
| cg15933935 | 1  | MOBK2L2C               | 2.55861E-41 | 3.06 | 22.00 | 7.19  | 0.92 | 0.82 | 1.00 |
| cg25571184 | 12 | METTL1; FAM119B        | 1.43293E-38 | 2.72 | 13.63 | 5.01  | 0.78 | 0.63 | 0.94 |
| cg10690327 | 3  | ACY1                   | 1.73103E-39 | 2.59 | 17.58 | 6.79  | 0.86 | 0.74 | 0.99 |
| cg15088822 | 5  | DIAPH1                 | 0.02596345  | 2.59 | 3.06  | 1.18  | 0.89 | 0.78 | 1.00 |
| cg19977408 | 4  | PGRMC2                 | 2.31088E-39 | 2.44 | 17.79 | 7.30  | 0.86 | 0.74 | 0.99 |
| cg11407066 | 1  | RPS8                   | 3.67459E-07 | 2.42 | 7.64  | 3.15  | 0.76 | 0.60 | 0.92 |

|            |    |                         |             |      |       |       |      |      |      |
|------------|----|-------------------------|-------------|------|-------|-------|------|------|------|
| cg23792679 | 7  | PSMC2                   | 1.05418E-38 | 2.33 | 15.65 | 6.71  | 0.77 | 0.62 | 0.93 |
| cg02395768 | 19 | ATP5SL                  | 0.000498404 | 2.26 | 5.38  | 2.39  | 0.77 | 0.62 | 0.93 |
| cg13614659 | 20 | SNX5                    | 1.73522E-06 | 2.23 | 7.80  | 3.49  | 0.75 | 0.58 | 0.91 |
| cg06815419 | 15 | BTBD1                   | 0.000969267 | 2.20 | 5.24  | 2.38  | 0.80 | 0.65 | 0.94 |
| cg06187252 | 5  | CETN3                   | 0.000167782 | 2.13 | 6.30  | 2.96  | 0.81 | 0.67 | 0.96 |
| cg05716166 | 8  | RALYL                   | 0.003126717 | 2.57 | 4.02  | 1.56  | 0.81 | 0.66 | 0.95 |
| cg09990790 | 4  | COX18                   | 1.31431E-11 | 2.19 | 12.51 | 5.71  | 0.84 | 0.71 | 0.97 |
| cg12486121 | 11 | PPFIBP2                 | 0.000107845 | 2.73 | 5.03  | 1.85  | 0.78 | 0.63 | 0.93 |
| cg01815035 | 1  | XPR1                    | 1.48213E-08 | 2.09 | 10.63 | 5.10  | 0.75 | 0.59 | 0.91 |
| cg14322427 | 6  | WASF1; CDC40            | 3.5522E-05  | 3.30 | 4.72  | 1.43  | 0.78 | 0.62 | 0.93 |
| cg15689069 | 19 | ZNF581                  | 0.027857499 | 2.19 | 3.54  | 1.62  | 0.81 | 0.67 | 0.95 |
| cg08689322 | 12 | OS9                     | 6.74679E-05 | 2.35 | 5.95  | 2.53  | 0.79 | 0.64 | 0.94 |
| cg25875515 | 5  | ZCCHC10                 | 0.002800864 | 2.56 | 4.07  | 1.59  | 0.84 | 0.71 | 0.97 |
| cg10860002 | 12 | ANAPC7                  | 3.72623E-14 | 2.10 | 15.65 | 7.46  | 0.78 | 0.63 | 0.94 |
| cg01180236 | 16 | EEF2K                   | 2.31797E-07 | 2.11 | 9.33  | 4.43  | 0.84 | 0.70 | 0.97 |
| cg26404748 | 14 | ACIN1                   | 0.000108248 | 2.98 | 4.70  | 1.58  | 0.75 | 0.59 | 0.91 |
| cg19965088 | 3  | VIPR1                   | 0.001483029 | 2.01 | 5.65  | 2.81  | 0.82 | 0.69 | 0.96 |
| cg12276298 | 10 | ECD; FAM149B1           | 0.007863224 | 3.34 | 3.04  | 0.91  | 0.75 | 0.58 | 0.91 |
| cg26767154 | 4  | NUP54                   | 1.83993E-38 | 3.88 | 11.25 | 2.90  | 0.80 | 0.65 | 0.94 |
| cg04199977 | 16 | NUBP1                   | 0.000114909 | 2.56 | 5.29  | 2.07  | 0.83 | 0.69 | 0.96 |
| cg00064255 | 1  | LRRC8C                  | 0.003090668 | 2.45 | 4.19  | 1.71  | 0.75 | 0.59 | 0.91 |
| cg07935151 | 6  | LSM2                    | 6.44988E-10 | 2.21 | 10.95 | 4.96  | 0.83 | 0.70 | 0.97 |
| cg04939555 | 13 | SPG20                   | 9.87406E-11 | 2.76 | 9.00  | 3.26  | 0.81 | 0.67 | 0.95 |
| cg20701145 | 12 | DUSP16                  | 0.026036093 | 3.45 | 2.56  | 0.74  | 0.78 | 0.63 | 0.93 |
| cg06005309 | 2  | STRADB; TRAK2           | 3.56562E-38 | 3.24 | 11.08 | 3.42  | 0.82 | 0.68 | 0.96 |
| cg00091986 | 11 | MDK                     | 3.5127E-15  | 3.16 | 10.39 | 3.29  | 0.88 | 0.76 | 0.99 |
| cg09506515 | 20 | SNHG11                  | 1.98786E-09 | 3.04 | 7.57  | 2.49  | 0.87 | 0.75 | 0.99 |
| cg03839252 | 13 | FOXO1                   | 0.006246352 | 2.91 | 3.39  | 1.17  | 0.77 | 0.61 | 0.92 |
| cg24404401 | 16 | CALB2                   | 0.000832165 | 2.77 | 4.26  | 1.54  | 0.87 | 0.75 | 0.99 |
| cg13567310 | 18 | NDUFV2-AS1;<br>ANKRD12  | 0.004821193 | 2.40 | 4.07  | 1.70  | 0.76 | 0.60 | 0.92 |
| cg15946251 | 11 | KCNJ5                   | 0.000118475 | 2.38 | 5.66  | 2.37  | 0.83 | 0.70 | 0.97 |
| cg14769207 | 21 | SIM2                    | 6.58174E-39 | 2.32 | 16.57 | 7.14  | 0.76 | 0.60 | 0.92 |
| cg20294304 | 6  | HMGA1                   | 2.37512E-15 | 2.30 | 14.49 | 6.31  | 0.82 | 0.68 | 0.96 |
| cg15166561 | 18 | SMAD7                   | 0.004782255 | 2.05 | 4.86  | 2.37  | 0.78 | 0.63 | 0.93 |
| cg03426252 | 9  | CRAT; PPP2R4            | 4.38045E-12 | 3.17 | 8.74  | 2.75  | 0.76 | 0.60 | 0.92 |
| cg05943975 | 12 | MLEC                    | 0.002484428 | 2.90 | 3.74  | 1.29  | 0.77 | 0.61 | 0.92 |
| cg13264662 | 14 | COX16                   | 0.007097117 | 2.08 | 4.55  | 2.18  | 0.77 | 0.61 | 0.92 |
| cg08251337 | 16 | CENPN                   | 5.89982E-05 | 2.03 | 7.23  | 3.56  | 0.80 | 0.66 | 0.95 |
| cg07709080 | 15 | ANP32A                  | 0.007094446 | 2.39 | 3.91  | 1.64  | 0.76 | 0.60 | 0.92 |
| cg08822537 | 1  | ZBTB8A                  | 3.9545E-40  | 2.15 | 22.84 | 10.61 | 0.80 | 0.66 | 0.95 |
| cg10487770 | 5  | RAB3C                   | 9.24627E-46 | 2.81 | 36.07 | 12.86 | 0.89 | 0.77 | 1.00 |
| cg21883754 | 19 | TTYH1                   | 0.000137671 | 2.50 | 5.33  | 2.13  | 0.77 | 0.61 | 0.92 |
| cg06797525 | 6  | HIST1H2AM;<br>HIST1H2BO | 0.016635292 | 2.94 | 2.98  | 1.02  | 0.81 | 0.67 | 0.95 |
| cg17331461 | 7  | ATXN7L1                 | 1.66328E-39 | 3.64 | 14.92 | 4.10  | 0.85 | 0.73 | 0.98 |
| cg27085741 | 7  | CLCN1                   | 1.16643E-09 | 3.43 | 7.09  | 2.07  | 0.76 | 0.60 | 0.92 |
| cg19127283 | 3  | TRIM71                  | 0.029196116 | 2.11 | 3.64  | 1.72  | 0.77 | 0.62 | 0.93 |
| cg15317173 | 18 | KIAA1632                | 0.021557914 | 2.38 | 3.38  | 1.42  | 0.76 | 0.60 | 0.92 |
| cg02021606 | 21 | SIK1                    | 1.49124E-39 | 2.99 | 16.44 | 5.50  | 0.84 | 0.71 | 0.97 |
| cg02558537 | 11 | CWF19L2                 | 7.19134E-38 | 4.64 | 8.79  | 1.89  | 0.81 | 0.66 | 0.95 |
| cg22602910 | 9  | TRIM14                  | 9.1874E-07  | 3.71 | 5.31  | 1.43  | 0.79 | 0.64 | 0.94 |
| cg11369026 | 2  | ITSN2                   | 8.82485E-13 | 3.59 | 8.36  | 2.33  | 0.78 | 0.63 | 0.93 |
| cg02232875 | 1  | TXLNA                   | 7.86057E-13 | 3.53 | 8.47  | 2.40  | 0.81 | 0.66 | 0.95 |
| cg23167148 | 9  | TOR2A                   | 1.12395E-09 | 3.45 | 7.07  | 2.05  | 0.78 | 0.62 | 0.93 |

|            |    |                 |             |      |       |      |      |      |      |
|------------|----|-----------------|-------------|------|-------|------|------|------|------|
| cg10304637 | 6  | NRN1            | 9.60039E-12 | 2.87 | 9.28  | 3.24 | 0.85 | 0.71 | 0.98 |
| cg17194243 | 13 | FAM48A          | 0.000568563 | 2.85 | 4.31  | 1.52 | 0.80 | 0.66 | 0.95 |
| cg15937634 | 12 | BCL7A           | 5.37157E-07 | 2.62 | 6.94  | 2.65 | 0.77 | 0.62 | 0.93 |
| cg26500063 | 1  | MEX3A           | 2.322E-09   | 2.36 | 9.61  | 4.07 | 0.85 | 0.72 | 0.98 |
| cg12326308 | 15 | FAM227B; DTWD1  | 4.31626E-07 | 3.69 | 5.50  | 1.49 | 0.75 | 0.59 | 0.91 |
| cg00490421 | 12 | CPM             | 6.01523E-06 | 2.09 | 7.99  | 3.82 | 0.79 | 0.64 | 0.94 |
| cg05928650 | 5  | ITGA2           | 0.026461627 | 2.15 | 3.64  | 1.69 | 0.90 | 0.79 | 1.00 |
| cg07866476 | 16 | CBFB            | 1.10643E-06 | 2.07 | 8.89  | 4.30 | 0.84 | 0.70 | 0.97 |
| cg24484856 | 12 | SLC35E3         | 0.036753446 | 2.01 | 3.73  | 1.86 | 0.81 | 0.67 | 0.95 |
| cg08242069 | 12 | ADIPOR2         | 1.26955E-37 | 6.83 | 7.35  | 1.08 | 0.87 | 0.75 | 0.99 |
| cg06458358 | 8  | ARHGEF10        | 0.001856745 | 2.04 | 5.42  | 2.65 | 0.80 | 0.66 | 0.95 |
| cg07050555 | 12 | FBRSL1          | 0.031975104 | 2.16 | 3.51  | 1.63 | 0.79 | 0.64 | 0.94 |
| cg05888082 | 3  | DZIP3; KIAA1524 | 1.50408E-12 | 3.99 | 7.78  | 1.95 | 0.76 | 0.60 | 0.92 |
| cg26954533 | 19 | ZNF266          | 0.001776083 | 2.46 | 4.41  | 1.79 | 0.77 | 0.62 | 0.93 |
| cg25436985 | 22 | XRCC6; PPPDE2   | 0.024292169 | 2.72 | 2.98  | 1.09 | 0.81 | 0.67 | 0.96 |
| cg09252805 | 1  | ZBTB40          | 6.79288E-39 | 3.18 | 13.71 | 4.32 | 0.89 | 0.77 | 1.00 |
| cg01395760 | 16 | KIF22           | 6.5568E-08  | 3.03 | 6.70  | 2.21 | 0.79 | 0.64 | 0.94 |
| cg14492773 | 5  | GPBP1           | 4.98026E-42 | 2.99 | 24.45 | 8.17 | 0.90 | 0.80 | 1.00 |
| cg22992573 | 12 | VEZT; FGD6      | 1.4522E-39  | 2.90 | 16.73 | 5.77 | 0.77 | 0.62 | 0.93 |
| cg00920484 | 8  | RNF19A          | 0.000141941 | 2.81 | 4.82  | 1.71 | 0.84 | 0.71 | 0.97 |
| cg00529181 | 12 | ESYT1           | 1.73761E-06 | 2.80 | 6.20  | 2.21 | 0.76 | 0.60 | 0.92 |
| cg12983110 | 1  | DOCK7           | 6.64508E-06 | 2.52 | 6.37  | 2.53 | 0.75 | 0.59 | 0.91 |
| cg17168820 | 19 | JOSD2           | 2.46161E-10 | 2.43 | 9.99  | 4.11 | 0.82 | 0.69 | 0.96 |
| cg26648054 | 17 | DLG4            | 0.000282413 | 2.42 | 5.23  | 2.16 | 0.89 | 0.78 | 1.00 |
| cg17414580 | 3  | KPNA4           | 0.016021825 | 2.31 | 3.64  | 1.58 | 0.77 | 0.61 | 0.92 |
| cg10526733 | 15 | TARSL2          | 4.25144E-39 | 2.14 | 18.53 | 8.65 | 0.82 | 0.68 | 0.96 |
| cg00597366 | 16 | GPT2            | 0.002020142 | 2.08 | 5.22  | 2.50 | 0.75 | 0.59 | 0.91 |
| cg09832551 | 6  | RING1           | 0.022665622 | 2.07 | 3.90  | 1.89 | 0.79 | 0.64 | 0.94 |
| cg18428563 | 13 | FAM124A         | 1.12988E-06 | 2.06 | 8.91  | 4.32 | 0.82 | 0.69 | 0.96 |
| cg06641938 | 1  | UBXN11          | 1.125E-06   | 2.84 | 6.26  | 2.21 | 0.83 | 0.69 | 0.96 |
| cg23653835 | 1  | PUM1            | 1.37609E-08 | 3.10 | 6.99  | 2.25 | 0.75 | 0.59 | 0.91 |
| cg20328917 | 12 | TMTC3; CEP290   | 3.68352E-07 | 2.21 | 8.52  | 3.85 | 0.80 | 0.66 | 0.95 |
| cg02891332 | 18 | TWSG1           | 0.000287424 | 2.88 | 4.50  | 1.56 | 0.91 | 0.81 | 1.00 |
| cg21184585 | 2  | SEPT10; ANKRD57 | 9.37481E-07 | 2.26 | 7.93  | 3.51 | 0.77 | 0.62 | 0.93 |
| cg12684684 | 2  | ARPC2           | 0.038000313 | 2.91 | 2.65  | 0.91 | 0.80 | 0.65 | 0.94 |
| cg03000603 | 19 | DHX34           | 3.4001E-06  | 3.14 | 5.52  | 1.76 | 0.83 | 0.69 | 0.97 |
| cg15485113 | 9  | SAXO1; Rraga    | 0.01984315  | 2.27 | 3.58  | 1.57 | 0.76 | 0.60 | 0.92 |
| cg20415529 | 4  | POLR2B          | 3.23923E-39 | 2.03 | 20.05 | 9.90 | 0.87 | 0.75 | 0.99 |
| cg16029838 | 7  | NUDCD3          | 0.000260378 | 3.83 | 3.85  | 1.00 | 0.78 | 0.63 | 0.94 |
| cg17229496 | 11 | TMEM109         | 4.73544E-39 | 3.61 | 13.51 | 3.74 | 0.81 | 0.66 | 0.95 |
| cg09859272 | 12 | RFC5            | 0.004152268 | 2.30 | 4.32  | 1.88 | 0.77 | 0.62 | 0.93 |
| cg04054012 | 13 | THSD1           | 9.62908E-05 | 2.13 | 6.53  | 3.06 | 0.77 | 0.62 | 0.93 |
| cg01991785 | 17 | RPTOR           | 7.50857E-13 | 2.33 | 12.45 | 5.35 | 0.78 | 0.63 | 0.93 |
| cg26734620 | 12 | CS              | 0.023370122 | 2.36 | 3.37  | 1.43 | 0.77 | 0.61 | 0.92 |
| cg19016924 | 16 | IST1            | 0.00018188  | 2.40 | 5.45  | 2.28 | 0.87 | 0.75 | 0.99 |
| cg25175469 | 15 | FAM63B          | 0.000317579 | 2.76 | 4.63  | 1.68 | 0.76 | 0.60 | 0.92 |
| cg03556393 | 12 | HOXC10          | 4.41918E-11 | 2.84 | 8.98  | 3.16 | 0.75 | 0.58 | 0.91 |
| cg09134682 | 17 | FLCN            | 2.4474E-06  | 2.46 | 6.87  | 2.79 | 0.78 | 0.63 | 0.93 |
| cg07006526 | 22 | SMTN            | 0.047203772 | 2.39 | 2.95  | 1.23 | 0.82 | 0.69 | 0.96 |
| cg22541679 | 13 | EDNRB           | 6.06982E-41 | 4.23 | 18.34 | 4.33 | 0.85 | 0.72 | 0.98 |
| cg06656344 | 1  | NTNG1           | 1.45697E-05 | 3.64 | 4.69  | 1.29 | 0.88 | 0.76 | 1.00 |
| cg16232979 | 19 | TPM4            | 4.8876E-38  | 3.59 | 10.13 | 2.82 | 0.94 | 0.85 | 1.00 |
| cg17642145 | 8  | PPP3CC          | 0.000236853 | 3.22 | 4.24  | 1.32 | 0.81 | 0.67 | 0.96 |
| cg01560739 | 3  | OSBPL10; ZNF860 | 3.48886E-06 | 3.13 | 5.53  | 1.77 | 0.81 | 0.66 | 0.95 |

|            |    |                |             |      |       |      |      |      |      |
|------------|----|----------------|-------------|------|-------|------|------|------|------|
| cg15894039 | 8  | INTS8          | 0.000156929 | 2.69 | 4.96  | 1.84 | 0.81 | 0.67 | 0.96 |
| cg25036234 | 2  | EFR3B          | 0.001927697 | 2.64 | 4.12  | 1.56 | 0.87 | 0.75 | 0.99 |
| cg19943978 | 12 | CLEC2B         | 1.19946E-38 | 2.58 | 14.39 | 5.58 | 0.79 | 0.64 | 0.94 |
| cg08080008 | 16 | NDUFB10        | 0.000426787 | 2.51 | 4.89  | 1.94 | 0.78 | 0.62 | 0.93 |
| cg04465974 | 1  | SUCO           | 0.000724539 | 2.51 | 4.69  | 1.87 | 0.77 | 0.61 | 0.92 |
| cg20649047 | 14 | NUMB           | 0.034230179 | 2.34 | 3.19  | 1.36 | 0.79 | 0.64 | 0.94 |
| cg21691267 | 18 | ZNF24          | 0.033014524 | 2.32 | 3.23  | 1.39 | 0.92 | 0.83 | 1.00 |
| cg19686855 | 7  | NDUFA5         | 0.00760996  | 2.20 | 4.22  | 1.92 | 0.77 | 0.61 | 0.92 |
| cg12950434 | 20 | CNBD2          | 5.80298E-13 | 2.12 | 14.38 | 6.79 | 0.85 | 0.72 | 0.98 |
| cg13909453 | 3  | PLD1           | 7.20095E-11 | 2.10 | 12.70 | 6.05 | 0.76 | 0.60 | 0.92 |
| cg18963750 | 6  | TUBB           | 0.020925375 | 2.09 | 3.89  | 1.86 | 0.75 | 0.58 | 0.91 |
| cg18892239 | 6  | BAT3           | 4.1769E-10  | 2.09 | 12.12 | 5.81 | 0.75 | 0.59 | 0.91 |
| cg22322187 | 17 | FN3KRP         | 2.85339E-39 | 2.03 | 20.24 | 9.96 | 0.81 | 0.67 | 0.95 |
| cg10207042 | 12 | RAD51AP1       | 0.018816068 | 2.03 | 4.10  | 2.02 | 0.78 | 0.63 | 0.93 |
| cg17217189 | 17 | IGF2BP1        | 0.017600047 | 2.06 | 4.07  | 1.97 | 0.90 | 0.80 | 1.00 |
| cg14805136 | 1  | SLC39A1        | 3.56207E-05 | 2.92 | 5.12  | 1.75 | 0.75 | 0.59 | 0.91 |
| cg23597375 | 22 | NHP2L1         | 0.009065596 | 2.84 | 3.30  | 1.16 | 0.79 | 0.64 | 0.94 |
| cg25494665 | 13 | DGKH           | 0.001097345 | 2.18 | 5.24  | 2.41 | 0.86 | 0.73 | 0.98 |
| cg16713690 | 19 | ZNF17          | 2.75023E-09 | 2.03 | 11.82 | 5.81 | 0.75 | 0.58 | 0.91 |
| cg05796909 | 17 | SEN3           | 0.007539009 | 2.17 | 4.28  | 1.97 | 0.77 | 0.62 | 0.93 |
| cg21493666 | 11 | PPME1; C2CD3   | 0.006700124 | 2.58 | 3.68  | 1.42 | 0.81 | 0.66 | 0.95 |
| cg24451981 | 15 | BUB1B          | 8.35583E-10 | 4.00 | 6.56  | 1.64 | 0.82 | 0.68 | 0.96 |
| cg04300632 | 17 | RNASEK         | 1.09609E-38 | 3.53 | 12.42 | 3.52 | 0.78 | 0.63 | 0.94 |
| cg17953633 | 17 | MRM1           | 2.54367E-11 | 2.50 | 10.38 | 4.16 | 0.81 | 0.67 | 0.96 |
| cg00761861 | 14 | VT11B          | 0.001611641 | 3.33 | 3.58  | 1.07 | 0.77 | 0.62 | 0.93 |
| cg17495178 | 4  | PTPN13         | 1.46303E-14 | 5.22 | 7.65  | 1.46 | 0.82 | 0.69 | 0.96 |
| cg27315947 | 21 | GART; SON      | 9.65995E-05 | 2.72 | 5.07  | 1.86 | 0.80 | 0.65 | 0.94 |
| cg19664712 | 6  | CDKAL1         | 0.000110111 | 2.30 | 5.91  | 2.57 | 0.79 | 0.64 | 0.94 |
| cg09522027 | 2  | PPP1CB         | 0.000495761 | 2.19 | 5.58  | 2.55 | 0.81 | 0.66 | 0.95 |
| cg06102063 | 9  | CENPP; NOL8    | 0.007016271 | 2.55 | 3.70  | 1.45 | 0.75 | 0.58 | 0.91 |
| cg14626490 | 9  | NUP188; DOLK   | 0.007472754 | 2.68 | 3.53  | 1.32 | 0.81 | 0.66 | 0.95 |
| cg15837503 | 17 | MRPL12         | 5.51282E-06 | 2.51 | 6.45  | 2.57 | 0.75 | 0.59 | 0.91 |
| cg14614793 | 9  | IKBKAP         | 4.72854E-41 | 6.12 | 17.02 | 2.78 | 0.81 | 0.67 | 0.96 |
| cg09882656 | 5  | DAB2           | 4.61898E-15 | 5.12 | 7.86  | 1.54 | 0.76 | 0.60 | 0.92 |
| cg06516150 | 12 | ACACB          | 2.47673E-06 | 3.65 | 5.12  | 1.40 | 0.78 | 0.63 | 0.93 |
| cg09215152 | 11 | PPP2R1B        | 4.77307E-06 | 3.23 | 5.33  | 1.65 | 0.77 | 0.61 | 0.92 |
| cg21726313 | 1  | GPSM2          | 9.38416E-40 | 3.07 | 16.90 | 5.51 | 0.84 | 0.71 | 0.97 |
| cg18173908 | 7  | KLHDC10        | 1.00524E-39 | 3.05 | 16.84 | 5.51 | 0.83 | 0.70 | 0.97 |
| cg06745957 | 11 | LIPT2          | 1.78229E-38 | 3.00 | 12.59 | 4.20 | 0.83 | 0.69 | 0.97 |
| cg03704756 | 20 | PRNP           | 3.03639E-38 | 2.89 | 11.96 | 4.13 | 0.79 | 0.64 | 0.94 |
| cg25992610 | 17 | NLK            | 3.39058E-38 | 2.69 | 12.26 | 4.55 | 0.78 | 0.62 | 0.93 |
| cg17447240 | 7  | PDGFA          | 2.44819E-08 | 2.62 | 7.87  | 3.00 | 0.82 | 0.68 | 0.96 |
| cg08966155 | 3  | RPL35A; IQCG   | 7.78482E-11 | 2.45 | 10.27 | 4.19 | 0.82 | 0.69 | 0.96 |
| cg05029288 | 4  | UGDH           | 0.020463381 | 2.19 | 3.71  | 1.69 | 0.76 | 0.60 | 0.92 |
| cg18372367 | 12 | TNFRSF1A       | 0.000113211 | 2.07 | 6.70  | 3.23 | 0.75 | 0.58 | 0.91 |
| cg11441935 | 19 | ZNF566         | 3.30593E-06 | 2.06 | 8.47  | 4.12 | 0.77 | 0.62 | 0.93 |
| cg03000271 | 6  | SLC39A7; RXRB  | 1.08159E-07 | 3.34 | 6.16  | 1.84 | 0.77 | 0.61 | 0.92 |
| cg20407381 | 2  | PKP4; CCDC148  | 0.018632604 | 2.16 | 3.82  | 1.77 | 0.76 | 0.60 | 0.92 |
| cg00713939 | 8  | NAPRT1         | 7.81434E-42 | 2.88 | 24.31 | 8.44 | 0.79 | 0.64 | 0.94 |
| cg13412003 | 19 | ZNF792         | 1.47528E-08 | 2.22 | 9.73  | 4.39 | 0.84 | 0.71 | 0.97 |
| cg22846109 | 17 | DHRS13         | 0.007669666 | 2.49 | 3.73  | 1.50 | 0.85 | 0.72 | 0.98 |
| cg24904303 | 19 | ZC3H4          | 8.8763E-09  | 3.16 | 7.00  | 2.21 | 0.77 | 0.61 | 0.92 |
| cg23651146 | 3  | APPL1          | 2.68808E-07 | 2.87 | 6.61  | 2.30 | 0.79 | 0.64 | 0.94 |
| cg02579736 | 3  | FANCD2; CIDCEP | 0.000546275 | 2.73 | 4.47  | 1.64 | 0.77 | 0.61 | 0.92 |

|            |    |                 |             |      |       |       |      |      |      |
|------------|----|-----------------|-------------|------|-------|-------|------|------|------|
| cg15732812 | 1  | DYRK3           | 0.008620122 | 3.14 | 3.12  | 0.99  | 0.80 | 0.65 | 0.94 |
| cg16018184 | 19 | ECH1            | 0.000186026 | 2.52 | 5.18  | 2.06  | 0.76 | 0.60 | 0.92 |
| cg15248904 | 19 | UQCRFS1         | 0.012329494 | 2.25 | 3.88  | 1.72  | 0.82 | 0.68 | 0.96 |
| cg25701418 | 3  | MAG1            | 5.11338E-38 | 3.74 | 9.92  | 2.65  | 0.86 | 0.74 | 0.99 |
| cg00465476 | 15 | DUOX2           | 1.8338E-05  | 4.43 | 4.25  | 0.96  | 0.79 | 0.65 | 0.94 |
| cg05254098 | 19 | MKNK2           | 4.18203E-38 | 4.13 | 9.87  | 2.39  | 0.79 | 0.64 | 0.94 |
| cg13529912 | 6  | ELOVL5          | 7.55883E-06 | 3.90 | 4.70  | 1.20  | 0.78 | 0.62 | 0.93 |
| cg07936037 | 6  | SSR1            | 3.48665E-08 | 3.75 | 6.01  | 1.60  | 0.80 | 0.65 | 0.95 |
| cg08304478 | 17 | ASGR1           | 4.2193E-07  | 2.69 | 6.85  | 2.55  | 0.77 | 0.62 | 0.93 |
| cg18764438 | 3  | SNX4            | 8.89683E-10 | 2.44 | 9.53  | 3.90  | 0.77 | 0.62 | 0.93 |
| cg06213964 | 6  | FLJ22536        | 3.59927E-07 | 2.37 | 7.82  | 3.29  | 0.78 | 0.63 | 0.94 |
| cg16657816 | 16 | BCL7C           | 0.001054629 | 2.37 | 4.79  | 2.02  | 0.79 | 0.64 | 0.94 |
| cg13187788 | 17 | DLX3            | 6.57765E-09 | 2.34 | 9.37  | 4.01  | 0.80 | 0.65 | 0.95 |
| cg17895626 | 17 | PRPF8           | 0.017836326 | 2.00 | 4.22  | 2.11  | 0.77 | 0.61 | 0.92 |
| cg06751596 | 5  | SKP1            | 1.11949E-42 | 2.41 | 30.06 | 12.49 | 0.78 | 0.63 | 0.93 |
| cg10583382 | 11 | ELP4; IMMP1L    | 1.13591E-06 | 2.31 | 7.63  | 3.30  | 0.79 | 0.64 | 0.94 |
| cg19891271 | 1  | SSR2            | 3.49195E-05 | 3.05 | 4.97  | 1.63  | 0.77 | 0.62 | 0.93 |
| cg24722405 | 5  | PAIP2           | 0.003916523 | 2.31 | 4.33  | 1.87  | 0.76 | 0.60 | 0.92 |
| cg16963632 | 1  | DENND1B         | 0.027221653 | 2.23 | 3.47  | 1.56  | 0.75 | 0.58 | 0.91 |
| cg01996304 | 16 | ZNF668; ZNF646  | 0.015585515 | 2.83 | 3.09  | 1.09  | 0.76 | 0.60 | 0.92 |
| cg10338465 | 15 | CIB2            | 0.002384969 | 2.32 | 4.54  | 1.96  | 0.77 | 0.61 | 0.92 |
| cg23017654 | 17 | GHDC            | 3.16218E-39 | 3.20 | 14.81 | 4.63  | 0.77 | 0.61 | 0.92 |
| cg03678754 | 3  | RAB5A           | 3.05431E-06 | 3.64 | 5.08  | 1.40  | 0.78 | 0.62 | 0.93 |
| cg11952622 | 19 | ZNF324B         | 0.017129083 | 2.37 | 3.51  | 1.48  | 0.79 | 0.64 | 0.94 |
| cg17016559 | 22 | ATXN10          | 1.20455E-38 | 4.38 | 11.40 | 2.60  | 0.87 | 0.75 | 0.99 |
| cg14461522 | 10 | NPM3            | 3.29748E-05 | 3.77 | 4.42  | 1.17  | 0.75 | 0.59 | 0.91 |
| cg09781971 | 12 | MDM2            | 0.000192451 | 4.74 | 3.60  | 0.76  | 0.87 | 0.75 | 0.99 |
| cg20978010 | 12 | SETD1B          | 0.000250414 | 3.73 | 3.91  | 1.05  | 0.75 | 0.59 | 0.91 |
| cg21864071 | 16 | SPATA33; CHMP1A | 9.49551E-06 | 3.00 | 5.40  | 1.80  | 0.79 | 0.64 | 0.94 |
| cg04446777 | 10 | BTRC            | 0.002946207 | 2.71 | 3.87  | 1.43  | 0.78 | 0.63 | 0.93 |
| cg03637781 | 3  | CTDSPL          | 7.51867E-41 | 2.70 | 21.96 | 8.15  | 0.79 | 0.64 | 0.94 |
| cg24176566 | 12 | ATP2A2          | 0.00058539  | 2.38 | 5.02  | 2.11  | 0.78 | 0.63 | 0.94 |
| cg23481221 | 20 | TOMM34          | 1.54258E-07 | 2.21 | 8.85  | 4.00  | 0.75 | 0.58 | 0.91 |
| cg26660102 | 2  | PDK1            | 1.18731E-09 | 2.10 | 11.60 | 5.54  | 0.82 | 0.68 | 0.96 |
| cg13813874 | 22 | KLHL22          | 0.002323444 | 2.00 | 5.44  | 2.72  | 0.89 | 0.77 | 1.00 |
| cg24005131 | 12 | TCP11L2         | 0.044625022 | 2.63 | 2.76  | 1.05  | 0.78 | 0.63 | 0.94 |
| cg18345506 | 14 | PSEN1           | 0.007244729 | 2.06 | 4.59  | 2.22  | 0.78 | 0.63 | 0.94 |
| cg16739396 | 1  | ATG4C           | 3.99116E-11 | 3.66 | 7.50  | 2.05  | 0.81 | 0.66 | 0.95 |
| cg08726071 | 20 | GINS1           | 0.006415221 | 2.53 | 3.76  | 1.48  | 0.81 | 0.66 | 0.95 |
| cg13822158 | 19 | MEIS3           | 1.28167E-06 | 2.03 | 9.09  | 4.48  | 0.81 | 0.67 | 0.96 |
| cg02291533 | 19 | LRFN3           | 0.013309855 | 2.14 | 4.05  | 1.89  | 0.83 | 0.69 | 0.96 |
| cg25730717 | 7  | PDIA4           | 2.10983E-10 | 7.09 | 5.60  | 0.79  | 0.83 | 0.69 | 0.96 |
| cg05279284 | 14 | DHRS1           | 0.011872967 | 2.52 | 3.50  | 1.39  | 0.77 | 0.61 | 0.92 |
| cg12500437 | 17 | FAM104A         | 1.48148E-09 | 4.04 | 6.42  | 1.59  | 0.75 | 0.59 | 0.91 |
| cg05857825 | 20 | MAPRE1          | 2.961E-07   | 2.24 | 8.45  | 3.77  | 0.82 | 0.69 | 0.96 |
| cg24705402 | 4  | ARFIP1          | 1.1332E-13  | 2.26 | 13.55 | 5.99  | 0.85 | 0.72 | 0.98 |
| cg18639052 | 11 | ZDHHC5          | 0.001189174 | 2.15 | 5.29  | 2.46  | 0.76 | 0.60 | 0.92 |
| cg25600136 | 5  | NADK2           | 0.00081959  | 2.79 | 4.26  | 1.53  | 0.77 | 0.62 | 0.93 |
| cg16860267 | 18 | MPPE1           | 3.41601E-08 | 2.33 | 8.85  | 3.80  | 0.86 | 0.74 | 0.99 |
| cg11952076 | 9  | DOLK; NUP188    | 0.001415511 | 2.89 | 3.95  | 1.37  | 0.78 | 0.63 | 0.93 |
| cg14282407 | 17 | TRAPPC1; CNTROB | 6.99888E-38 | 7.78 | 7.95  | 1.02  | 0.83 | 0.70 | 0.97 |
| cg09432792 | 16 | GNAO1           | 1.99038E-12 | 3.23 | 8.79  | 2.72  | 0.84 | 0.70 | 0.97 |
| cg14020129 | 2  | GRHL1           | 1.04768E-38 | 2.76 | 14.04 | 5.10  | 0.81 | 0.66 | 0.95 |
| cg18026227 | 8  | ZFH4            | 6.14181E-15 | 2.62 | 12.14 | 4.63  | 0.77 | 0.61 | 0.92 |

|            |    |                         |             |      |       |      |      |      |      |
|------------|----|-------------------------|-------------|------|-------|------|------|------|------|
| cg08397339 | 19 | PIP5K1C                 | 0.001022828 | 2.32 | 4.91  | 2.11 | 0.88 | 0.76 | 1.00 |
| cg22700360 | 17 | MSI2                    | 0.002637957 | 2.23 | 4.67  | 2.09 | 0.81 | 0.67 | 0.96 |
| cg07941711 | 15 | LACTB                   | 8.3716E-13  | 2.04 | 15.20 | 7.46 | 0.76 | 0.60 | 0.92 |
| cg03559973 | 19 | ZNF226                  | 3.06943E-13 | 2.00 | 16.08 | 8.02 | 0.75 | 0.59 | 0.91 |
| cg14022620 | 16 | ITFG1; PHKB             | 9.02821E-10 | 2.29 | 10.28 | 4.48 | 0.85 | 0.72 | 0.98 |
| cg04199943 | 6  | HLA-L                   | 4.28471E-05 | 3.53 | 4.50  | 1.28 | 0.79 | 0.64 | 0.94 |
| cg09336228 | 16 | DDX19A                  | 0.008708313 | 2.20 | 4.15  | 1.88 | 0.79 | 0.64 | 0.94 |
| cg07742499 | 19 | SUV420H2                | 0.005156556 | 2.10 | 4.67  | 2.22 | 0.83 | 0.69 | 0.96 |
| cg12105108 | 18 | METTL4; NDC80           | 2.90233E-06 | 2.03 | 8.66  | 4.26 | 0.75 | 0.58 | 0.91 |
| cg03379367 | 16 | USP31                   | 1.56181E-39 | 3.26 | 15.71 | 4.82 | 0.86 | 0.74 | 0.99 |
| cg25212146 | 18 | DSEL                    | 6.36992E-06 | 2.61 | 6.17  | 2.36 | 0.75 | 0.59 | 0.91 |
| cg10929349 | 17 | SCO1                    | 0.041664912 | 2.36 | 3.05  | 1.29 | 0.80 | 0.65 | 0.95 |
| cg04835163 | 1  | TNNI3K; FPGT;<br>LRR1Q3 | 0.000624565 | 2.17 | 5.52  | 2.54 | 0.78 | 0.63 | 0.94 |
| cg18191664 | 8  | ERLIN2                  | 4.86294E-09 | 7.63 | 5.03  | 0.66 | 0.81 | 0.66 | 0.95 |
| cg24301192 | 12 | HRK                     | 1.03213E-38 | 2.17 | 16.61 | 7.64 | 0.82 | 0.69 | 0.96 |
| cg01316535 | 19 | ZNF121                  | 0.028020396 | 2.64 | 2.98  | 1.13 | 0.75 | 0.59 | 0.91 |
| cg05094046 | 18 | DYM                     | 6.5469E-05  | 2.03 | 7.21  | 3.56 | 0.75 | 0.59 | 0.91 |
| cg08953194 | 19 | GLTSCR1                 | 4.13396E-11 | 4.71 | 6.63  | 1.41 | 0.83 | 0.69 | 0.96 |
| cg19766441 | 4  | SLC34A2                 | 2.50245E-39 | 3.60 | 14.41 | 4.00 | 0.82 | 0.68 | 0.96 |
| cg10500461 | 5  | PPARGC1B                | 0.028692296 | 3.22 | 2.61  | 0.81 | 0.81 | 0.67 | 0.95 |
| cg13767695 | 16 | CDH15                   | 8.40647E-05 | 2.59 | 5.34  | 2.06 | 0.84 | 0.71 | 0.97 |
| cg25445017 | 15 | CTXN2                   | 2.36351E-07 | 2.38 | 7.95  | 3.34 | 0.81 | 0.67 | 0.95 |
| cg11443159 | 19 | IRGQ; ZNF576            | 2.11886E-38 | 2.37 | 14.22 | 6.01 | 0.77 | 0.61 | 0.92 |
| cg11335495 | 1  | GPN2                    | 0.009907084 | 2.19 | 4.10  | 1.87 | 0.80 | 0.65 | 0.95 |
| cg10784843 | 12 | ORAI1                   | 0.002119436 | 2.12 | 5.07  | 2.39 | 0.81 | 0.67 | 0.96 |
| cg22824647 | 19 | MAP1S                   | 0.000914837 | 2.04 | 5.80  | 2.84 | 0.75 | 0.58 | 0.91 |
| cg16023162 | 4  | PRKG2                   | 8.23579E-06 | 2.28 | 6.99  | 3.06 | 0.75 | 0.59 | 0.91 |
| cg26054395 | 1  | MTF2                    | 5.77515E-06 | 2.58 | 6.27  | 2.43 | 0.76 | 0.60 | 0.92 |
| cg24994173 | 5  | TSLP                    | 1.7301E-39  | 4.94 | 13.53 | 2.74 | 0.78 | 0.63 | 0.93 |
| cg27541540 | 12 | PTPN11                  | 5.41449E-38 | 9.29 | 8.07  | 0.87 | 0.79 | 0.65 | 0.94 |
| cg06889484 | 19 | MPV17L2                 | 0.007365739 | 2.46 | 3.79  | 1.54 | 0.76 | 0.60 | 0.92 |
| cg24114314 | 19 | ZNF677                  | 0.002169983 | 2.12 | 5.06  | 2.38 | 0.77 | 0.61 | 0.92 |
| cg17369088 | 17 | CCDC55                  | 5.50773E-41 | 2.59 | 22.95 | 8.84 | 0.78 | 0.63 | 0.93 |
| cg12804420 | 17 | ATAD5                   | 1.74052E-13 | 2.36 | 12.65 | 5.35 | 0.78 | 0.63 | 0.94 |
| cg07917502 | 2  | PREPL                   | 0.001292759 | 3.72 | 3.45  | 0.93 | 0.75 | 0.58 | 0.91 |
| cg24401310 | 15 | MTMR15                  | 0.003051997 | 2.62 | 3.96  | 1.51 | 0.77 | 0.61 | 0.92 |
| cg00986824 | 12 | KCNC2                   | 0.00049257  | 2.10 | 5.89  | 2.81 | 0.75 | 0.58 | 0.91 |
| cg06554331 | 10 | FAM21A                  | 0.026711897 | 2.22 | 3.51  | 1.58 | 0.78 | 0.63 | 0.94 |
| cg20573562 | 11 | SERGEF                  | 0.037318234 | 2.08 | 3.57  | 1.72 | 0.81 | 0.67 | 0.96 |
| cg14195684 | 8  | STAU2                   | 1.16576E-13 | 3.22 | 9.42  | 2.92 | 0.75 | 0.58 | 0.91 |
| cg18701590 | 5  | PRR7                    | 0.012257701 | 2.00 | 4.46  | 2.23 | 0.75 | 0.59 | 0.91 |
| cg12284567 | 17 | PSMC3IP                 | 0.048351844 | 2.40 | 2.93  | 1.22 | 0.79 | 0.64 | 0.94 |
| cg22219278 | 5  | LMAN2                   | 0.038011248 | 2.43 | 3.03  | 1.25 | 0.82 | 0.69 | 0.96 |
| cg15078479 | 14 | PARP2; RPPH1            | 0.011605415 | 2.67 | 3.35  | 1.25 | 0.75 | 0.59 | 0.91 |
| cg02824451 | 19 | SLC7A10                 | 4.14825E-39 | 4.05 | 13.15 | 3.24 | 0.81 | 0.66 | 0.95 |
| cg08134704 | 13 | GTF2F2                  | 0.046046609 | 2.14 | 3.31  | 1.55 | 0.83 | 0.70 | 0.97 |
| cg09114151 | 11 | EED                     | 0.000832584 | 2.21 | 5.27  | 2.38 | 0.87 | 0.75 | 0.99 |
| cg24006384 | 1  | PARK7                   | 0.001506249 | 3.04 | 3.80  | 1.25 | 0.75 | 0.58 | 0.91 |
| cg18154214 | 16 | PSMD7                   | 8.05112E-12 | 3.52 | 8.01  | 2.27 | 0.76 | 0.60 | 0.92 |

**Supplementary Table S2:**

| Target ID  | CHR | Genes     | FDR p-Val   | Fold change | % Methylation |          | AUC  | CI    |       |
|------------|-----|-----------|-------------|-------------|---------------|----------|------|-------|-------|
|            |     |           |             |             | Cases         | Controls |      | lower | upper |
| cg22700691 | 10  | C10orf140 | 0.000463149 | 2.56        | 4.78          | 1.87     | 0.76 | 0.60  | 0.92  |
| cg05855489 | 10  | C10orf26  | 1.18197E-39 | 2.44        | 18.92         | 7.76     | 0.82 | 0.68  | 0.96  |
| cg05596319 | 10  | C10orf88  | 6.21568E-10 | 2.95        | 8.04          | 2.72     | 0.77 | 0.61  | 0.92  |
| cg21156771 | 11  | C11orf73  | 3.77811E-10 | 3.19        | 7.70          | 2.42     | 0.81 | 0.67  | 0.95  |
| cg18369257 | 11  | C11orf9   | 3.21742E-06 | 3.41        | 5.25          | 1.54     | 0.79 | 0.64  | 0.94  |
| cg16704476 | 12  | C12orf23  | 3.9358E-13  | 2.05        | 15.39         | 7.52     | 0.78 | 0.63  | 0.94  |
| cg26229977 | 12  | C12orf57  | 6.71069E-07 | 2.37        | 7.63          | 3.23     | 0.84 | 0.70  | 0.97  |
| cg16091543 | 12  | C12orf65  | 5.13575E-08 | 3.43        | 6.23          | 1.82     | 0.81 | 0.66  | 0.95  |
| cg15901216 | 14  | C14orf102 | 1.91243E-10 | 3.97        | 6.88          | 1.73     | 0.83 | 0.69  | 0.97  |
| cg08165558 | 14  | C14orf167 | 1.11216E-05 | 2.10        | 7.68          | 3.66     | 0.76 | 0.60  | 0.92  |
| cg18498159 | 15  | C15orf17  | 4.66236E-12 | 3.12        | 8.83          | 2.83     | 0.76 | 0.60  | 0.92  |
| cg26884816 | 15  | C15orf39  | 0.002213234 | 2.73        | 3.95          | 1.45     | 0.76 | 0.60  | 0.92  |
| cg08251337 | 16  | C16orf61  | 5.89982E-05 | 2.03        | 7.23          | 3.56     | 0.80 | 0.66  | 0.95  |
| cg25674838 | 17  | C17orf105 | 6.59164E-06 | 3.48        | 5.01          | 1.44     | 0.81 | 0.67  | 0.95  |
| cg01906998 | 17  | C17orf106 | 0.00137692  | 2.41        | 4.60          | 1.91     | 0.81 | 0.67  | 0.96  |
| cg13258989 | 17  | C17orf28  | 8.30075E-06 | 2.69        | 5.93          | 2.21     | 0.83 | 0.69  | 0.96  |
| cg10929349 | 17  | C17orf48  | 0.041664912 | 2.36        | 3.05          | 1.29     | 0.80 | 0.65  | 0.95  |
| cg23261070 | 17  | C17orf49  | 0.001020992 | 2.94        | 4.02          | 1.37     | 0.80 | 0.65  | 0.95  |
| cg22700039 | 17  | C17orf51  | 2.75772E-40 | 2.07        | 24.37         | 11.79    | 0.80 | 0.65  | 0.95  |
| cg14576294 | 17  | C17orf61  | 0.010312747 | 2.86        | 3.24          | 1.13     | 0.75 | 0.59  | 0.91  |
| cg14595275 | 17  | C17orf72  | 0.000122042 | 2.30        | 5.87          | 2.56     | 0.77 | 0.61  | 0.92  |
| cg02840638 | 17  | C17orf76  | 0.002150033 | 2.02        | 5.43          | 2.69     | 0.81 | 0.66  | 0.95  |
| cg12500437 | 17  | C17orf80  | 1.48148E-09 | 4.04        | 6.42          | 1.59     | 0.75 | 0.59  | 0.91  |
| cg12202743 | 18  | C18orf22  | 0.029421304 | 2.32        | 3.31          | 1.43     | 0.84 | 0.71  | 0.97  |
| cg01968530 | 18  | C18orf45  | 0.003526641 | 2.04        | 5.08          | 2.50     | 0.75 | 0.59  | 0.91  |
| cg03766516 | 19  | C19orf29  | 0.007592812 | 2.92        | 3.31          | 1.13     | 0.88 | 0.77  | 1.00  |
| cg01037673 | 19  | C19orf39  | 0.013222805 | 2.10        | 4.13          | 1.96     | 0.86 | 0.74  | 0.99  |
| cg26886427 | 19  | C19orf52  | 6.25909E-12 | 2.84        | 9.48          | 3.34     | 0.76 | 0.60  | 0.92  |
| cg18886719 | 19  | C19orf53  | 1.28962E-08 | 2.85        | 7.48          | 2.63     | 0.89 | 0.78  | 1.00  |
| cg12571879 | 19  | C19orf59  | 2.05108E-09 | 2.58        | 8.75          | 3.40     | 0.82 | 0.69  | 0.96  |
| cg07697134 | 19  | C19orf62  | 2.65424E-13 | 2.05        | 15.54         | 7.59     | 0.76 | 0.60  | 0.92  |
| cg05344495 | 19  | C19orf77  | 1.0135E-11  | 2.25        | 12.13         | 5.39     | 0.76 | 0.60  | 0.92  |
| cg17225465 | 1   | C1orf212  | 1.35372E-38 | 2.37        | 15.03         | 6.35     | 0.84 | 0.71  | 0.97  |
| cg16306898 | 1   | C1orf70   | 2.74541E-11 | 3.89        | 7.33          | 1.88     | 0.85 | 0.71  | 0.98  |
| cg12858300 | 1   | C1orf74   | 4.39704E-05 | 2.75        | 5.29          | 1.92     | 0.75 | 0.59  | 0.91  |
| cg27312944 | 1   | C1orf86   | 1.10954E-08 | 2.46        | 8.67          | 3.53     | 0.87 | 0.75  | 0.99  |
| cg20777508 | 20  | C20orf114 | 6.38976E-12 | 4.25        | 7.28          | 1.71     | 0.77 | 0.62  | 0.93  |
| cg02480104 | 20  | C20orf132 | 0.001385512 | 2.97        | 3.89          | 1.31     | 0.78 | 0.63  | 0.94  |
| cg17234198 | 20  | C20orf199 | 6.76865E-06 | 3.42        | 5.06          | 1.48     | 0.76 | 0.60  | 0.92  |
| cg06510830 | 21  | C21orf45  | 0.005924677 | 2.05        | 4.74          | 2.31     | 0.77 | 0.61  | 0.92  |
| cg25314532 | 22  | C22orf23  | 0.002644531 | 2.14        | 4.90          | 2.29     | 0.75 | 0.59  | 0.91  |
| cg07596120 | 22  | C22orf32  | 1.1514E-05  | 2.43        | 6.41          | 2.64     | 0.83 | 0.69  | 0.97  |
| cg05570707 | 2   | C2orf44   | 3.50123E-14 | 2.11        | 15.52         | 7.35     | 0.77 | 0.62  | 0.93  |
| cg19233043 | 3   | C3orf18   | 1.23008E-05 | 3.28        | 5.03          | 1.53     | 0.81 | 0.66  | 0.95  |
| cg02758599 | 3   | C3orf21   | 6.09162E-11 | 2.22        | 11.70         | 5.26     | 0.75 | 0.59  | 0.91  |
| cg22993707 | 3   | C3orf31   | 5.9831E-06  | 4.59        | 4.44          | 0.97     | 0.86 | 0.74  | 0.99  |



|            |    |           |             |      |       |       |      |      |      |
|------------|----|-----------|-------------|------|-------|-------|------|------|------|
| cg24826502 | 3  | C3orf37   | 0.001926272 | 2.14 | 5.09  | 2.38  | 0.81 | 0.66 | 0.95 |
| cg16671114 | 3  | C3orf58   | 0.002335892 | 3.25 | 3.51  | 1.08  | 0.79 | 0.64 | 0.94 |
| cg10515332 | 4  | C4orf37   | 7.47883E-06 | 2.51 | 6.36  | 2.54  | 0.76 | 0.60 | 0.92 |
| cg21127184 | 4  | C4orf41   | 1.06861E-44 | 2.07 | 41.24 | 19.88 | 0.78 | 0.63 | 0.94 |
| cg04522604 | 5  | C5orf13   | 1.40483E-09 | 2.03 | 12.17 | 6.00  | 0.84 | 0.71 | 0.97 |
| cg04124112 | 5  | C5orf24   | 7.48199E-39 | 3.10 | 13.72 | 4.42  | 0.85 | 0.73 | 0.98 |
| cg03866757 | 5  | C5orf41   | 3.97323E-05 | 3.13 | 4.85  | 1.55  | 0.75 | 0.59 | 0.91 |
| cg08904082 | 5  | C5orf43   | 1.51275E-06 | 3.51 | 5.35  | 1.52  | 0.78 | 0.62 | 0.93 |
| cg04059965 | 5  | C5orf45   | 0.000736428 | 3.53 | 3.71  | 1.05  | 0.83 | 0.70 | 0.97 |
| cg07816366 | 6  | C6orf134  | 0.004759907 | 2.67 | 3.72  | 1.40  | 0.76 | 0.60 | 0.92 |
| cg19477921 | 6  | C6orf174  | 3.74083E-09 | 2.04 | 11.63 | 5.70  | 0.75 | 0.59 | 0.91 |
| cg05955802 | 6  | C6orf204  | 0.007556663 | 2.05 | 4.61  | 2.25  | 0.76 | 0.60 | 0.92 |
| cg11371403 | 9  | C9orf135  | 4.14224E-08 | 2.62 | 7.73  | 2.95  | 0.75 | 0.58 | 0.91 |
| cg05338745 | 12 | C12orf26  | 2.10056E-05 | 6.12 | 3.80  | 0.62  | 0.77 | 0.61 | 0.93 |
| cg05279284 | 14 | C14orf21  | 0.011872967 | 2.52 | 3.50  | 1.39  | 0.77 | 0.61 | 0.92 |
| cg05386387 | 18 | C18orf55  | 0.003054209 | 4.65 | 2.92  | 0.63  | 0.85 | 0.72 | 0.98 |
| cg14109663 | 19 | C19orf70  | 1.54679E-06 | 3.95 | 5.03  | 1.27  | 0.86 | 0.73 | 0.98 |
| cg14614793 | 9  | C9orf6    | 4.72854E-41 | 6.12 | 17.02 | 2.78  | 0.81 | 0.67 | 0.96 |
| cg04343292 | 1  | C1orf174  | 6.1472E-08  | 2.46 | 8.09  | 3.28  | 0.84 | 0.71 | 0.97 |
| cg06700856 | 18 | C18orf18  | 0.003617756 | 2.61 | 3.90  | 1.50  | 0.75 | 0.59 | 0.91 |
| cg26945813 | 10 | C10orf114 | 2.02145E-11 | 2.38 | 11.07 | 4.66  | 0.81 | 0.66 | 0.95 |
| cg00104570 | 3  | C3orf26   | 0.037166153 | 3.55 | 2.38  | 0.67  | 0.75 | 0.59 | 0.91 |
| cg24737639 | 12 | C12orf48  | 0.022361072 | 2.12 | 3.78  | 1.78  | 0.76 | 0.60 | 0.92 |
| cg12635019 | 15 | C15orf56  | 0.011507136 | 2.26 | 3.89  | 1.72  | 0.82 | 0.68 | 0.96 |
| cg07917502 | 2  | C2orf34   | 0.001292759 | 3.72 | 3.45  | 0.93  | 0.75 | 0.58 | 0.91 |
| cg13614659 | 20 | C20orf72  | 1.73522E-06 | 2.23 | 7.80  | 3.49  | 0.75 | 0.58 | 0.91 |
| cg09703789 | 6  | C6orf225  | 0.015461548 | 2.15 | 3.95  | 1.84  | 0.78 | 0.63 | 0.93 |
| cg06030942 | 14 | C14orf119 | 1.86281E-13 | 4.06 | 8.08  | 1.99  | 0.84 | 0.71 | 0.97 |
| cg20648939 | 18 | C18orf19  | 0.045635078 | 2.20 | 3.22  | 1.46  | 0.78 | 0.62 | 0.93 |
| cg26831488 | 11 | C11orf71  | 0.027317358 | 2.42 | 3.22  | 1.33  | 0.78 | 0.63 | 0.93 |
| cg27063739 | 9  | C9orf163  | 0.033659762 | 2.09 | 3.60  | 1.72  | 0.78 | 0.63 | 0.94 |
| cg20876723 | 17 | C17orf91  | 0.044304834 | 2.51 | 2.87  | 1.14  | 0.75 | 0.59 | 0.91 |
| cg15524173 | 19 | C19orf47  | 0.005204489 | 2.72 | 3.63  | 1.34  | 0.78 | 0.63 | 0.94 |
| cg20415529 | 4  | C4orf14   | 3.23923E-39 | 2.03 | 20.05 | 9.90  | 0.87 | 0.75 | 0.99 |
| cg10207042 | 12 | C12orf4   | 0.018816068 | 2.03 | 4.10  | 2.02  | 0.78 | 0.63 | 0.93 |

**Supplementary Table S3:**

| Target ID  | CHR | Gene                          | FDR p-Val | Fold change | % Methylation |          | AUC  | CI    |       |
|------------|-----|-------------------------------|-----------|-------------|---------------|----------|------|-------|-------|
|            |     |                               |           |             | Cases         | Controls |      | lower | upper |
| cg21816532 | 17  | LOC404266                     | 2.21E-08  | 2.13        | 10.15         | 4.77     | 0.89 | 0.78  | 1.00  |
| cg23065793 | 3   | LOC100128164                  | 1.18E-12  | 3.85        | 7.97          | 2.07     | 0.88 | 0.76  | 0.99  |
| cg21933829 | 16  | LOC101927814                  | 2.60E-02  | 2.07        | 3.82          | 1.85     | 0.87 | 0.75  | 0.99  |
| cg27312944 | 1   | LOC100128003                  | 1.11E-08  | 2.46        | 8.67          | 3.53     | 0.87 | 0.75  | 0.99  |
| cg12749132 | 1   | LOC100132111                  | 2.82E-06  | 5.75        | 4.27          | 0.74     | 0.87 | 0.75  | 0.99  |
| cg21348554 | 1   | LOC643355                     | 8.13E-05  | 2.70        | 5.17          | 1.92     | 0.86 | 0.74  | 0.99  |
| cg04127233 | 4   | LOC101927179                  | 2.13E-38  | 3.57        | 11.40         | 3.20     | 0.86 | 0.74  | 0.99  |
| cg19580633 | 5   | LOC100268168                  | 1.82E-08  | 4.54        | 5.62          | 1.24     | 0.85 | 0.73  | 0.98  |
| cg04343292 | 1   | LOC100133612                  | 6.15E-08  | 2.46        | 8.09          | 3.28     | 0.84 | 0.71  | 0.97  |
| cg01754828 | 6   | LOC101928307                  | 2.23E-14  | 2.03        | 16.72         | 8.22     | 0.83 | 0.70  | 0.97  |
| cg10800082 | 10  | LOC282997                     | 5.63E-39  | 2.57        | 15.71         | 6.12     | 0.83 | 0.70  | 0.97  |
| cg22905859 | 1   | LOC728855                     | 6.48E-07  | 3.26        | 5.82          | 1.79     | 0.83 | 0.69  | 0.97  |
| cg05009619 | 7   | LOC100134713                  | 1.75E-02  | 2.12        | 3.93          | 1.85     | 0.83 | 0.69  | 0.96  |
| cg06187252 | 5   | LOC731157                     | 1.68E-04  | 2.13        | 6.30          | 2.96     | 0.81 | 0.67  | 0.96  |
| cg15732840 | 2   | LOC100132215                  | 1.95E-09  | 2.96        | 7.73          | 2.61     | 0.81 | 0.67  | 0.95  |
| cg03467424 | 10  | LOC102031319                  | 2.65E-02  | 3.09        | 2.70          | 0.87     | 0.80 | 0.66  | 0.95  |
| cg19515530 | 4   | LOC550112                     | 1.18E-07  | 3.47        | 5.99          | 1.73     | 0.80 | 0.65  | 0.95  |
| cg18330637 | 20  | LOC388789                     | 1.52E-03  | 2.49        | 4.42          | 1.77     | 0.80 | 0.65  | 0.94  |
| cg09552183 | 12  | LOC101928597                  | 6.03E-07  | 4.01        | 5.21          | 1.30     | 0.80 | 0.65  | 0.94  |
| cg18029778 | 7   | LOC100216545                  | 7.55E-41  | 3.14        | 20.25         | 6.45     | 0.79 | 0.64  | 0.94  |
| cg12518410 | 2   | LOC100287216                  | 2.44E-07  | 4.86        | 4.99          | 1.03     | 0.79 | 0.64  | 0.94  |
| cg03213877 | 1   | LOC643837                     | 1.57E-13  | 3.82        | 8.38          | 2.20     | 0.79 | 0.64  | 0.94  |
| cg25635304 | 16  | LOC100505942                  | 4.25E-39  | 2.15        | 18.46         | 8.59     | 0.79 | 0.64  | 0.94  |
| cg01050704 | 19  | LOC100131691                  | 8.50E-03  | 2.33        | 3.92          | 1.68     | 0.79 | 0.64  | 0.94  |
| cg24626312 | 17  | LOC404266                     | 5.46E-05  | 3.35        | 4.57          | 1.36     | 0.79 | 0.64  | 0.94  |
| cg19125926 | 11  | LOC101929089                  | 2.39E-40  | 4.83        | 16.05         | 3.32     | 0.79 | 0.64  | 0.94  |
| cg15709401 | 20  | LOC100270804                  | 1.80E-12  | 7.28        | 6.25          | 0.86     | 0.79 | 0.64  | 0.94  |
| cg00140842 | 2   | LOC100302652                  | 2.16E-07  | 2.24        | 8.57          | 3.82     | 0.78 | 0.63  | 0.94  |
| cg03301945 | 19  | LOC147727                     | 1.95E-06  | 2.57        | 6.64          | 2.58     | 0.78 | 0.63  | 0.94  |
| cg17448127 | 4   | LOC285456                     | 3.60E-07  | 2.92        | 6.43          | 2.20     | 0.78 | 0.63  | 0.93  |
| cg11208853 | 12  | LOC653113                     | 3.51E-03  | 3.83        | 3.10          | 0.81     | 0.78 | 0.63  | 0.93  |
| cg25631714 | 4   | LOC550112                     | 2.45E-03  | 2.06        | 5.21          | 2.54     | 0.77 | 0.62  | 0.93  |
| cg05476169 | 22  | LOC646851                     | 1.03E-03  | 3.56        | 3.59          | 1.01     | 0.77 | 0.62  | 0.93  |
| cg22811818 | 3   | LOC440944                     | 2.55E-03  | 2.28        | 4.59          | 2.01     | 0.77 | 0.61  | 0.92  |
| cg20686479 | 11  | LOC100126784                  | 4.18E-04  | 2.31        | 5.32          | 2.30     | 0.77 | 0.61  | 0.92  |
| cg18026227 | 8   | LOC100192378                  | 6.14E-15  | 2.62        | 12.14         | 4.63     | 0.77 | 0.61  | 0.92  |
| cg23202277 | 17  | LOC100128977;<br>LOC100130148 | 4.46E-06  | 2.68        | 6.15          | 2.30     | 0.76 | 0.60  | 0.92  |
| cg08838040 | 7   | LOC100507642                  | 1.61E-05  | 2.22        | 6.96          | 3.13     | 0.75 | 0.59  | 0.91  |
| cg00719400 | 1   | LOC100130093                  | 3.55E-05  | 2.41        | 6.05          | 2.51     | 0.75 | 0.59  | 0.91  |
| cg06700856 | 18  | LOC339290                     | 3.62E-03  | 2.61        | 3.90          | 1.50     | 0.75 | 0.59  | 0.91  |
| cg20978010 | 12  | LOC338799                     | 2.50E-04  | 3.73        | 3.91          | 1.05     | 0.75 | 0.59  | 0.91  |

Supplementary Figure 1A.

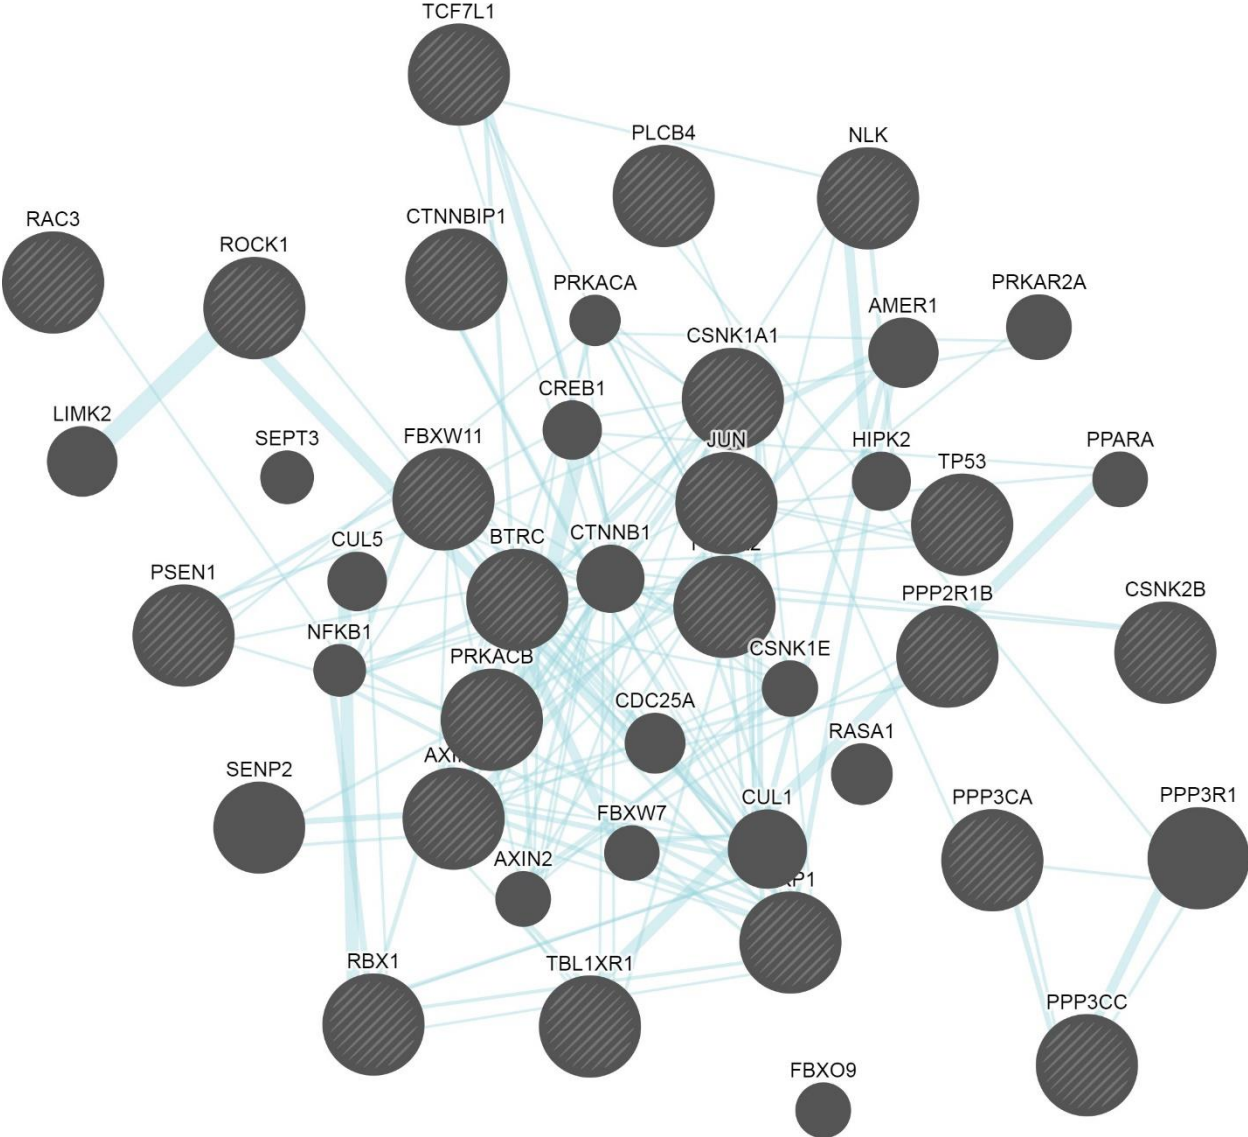

Supplementary Figure 1B

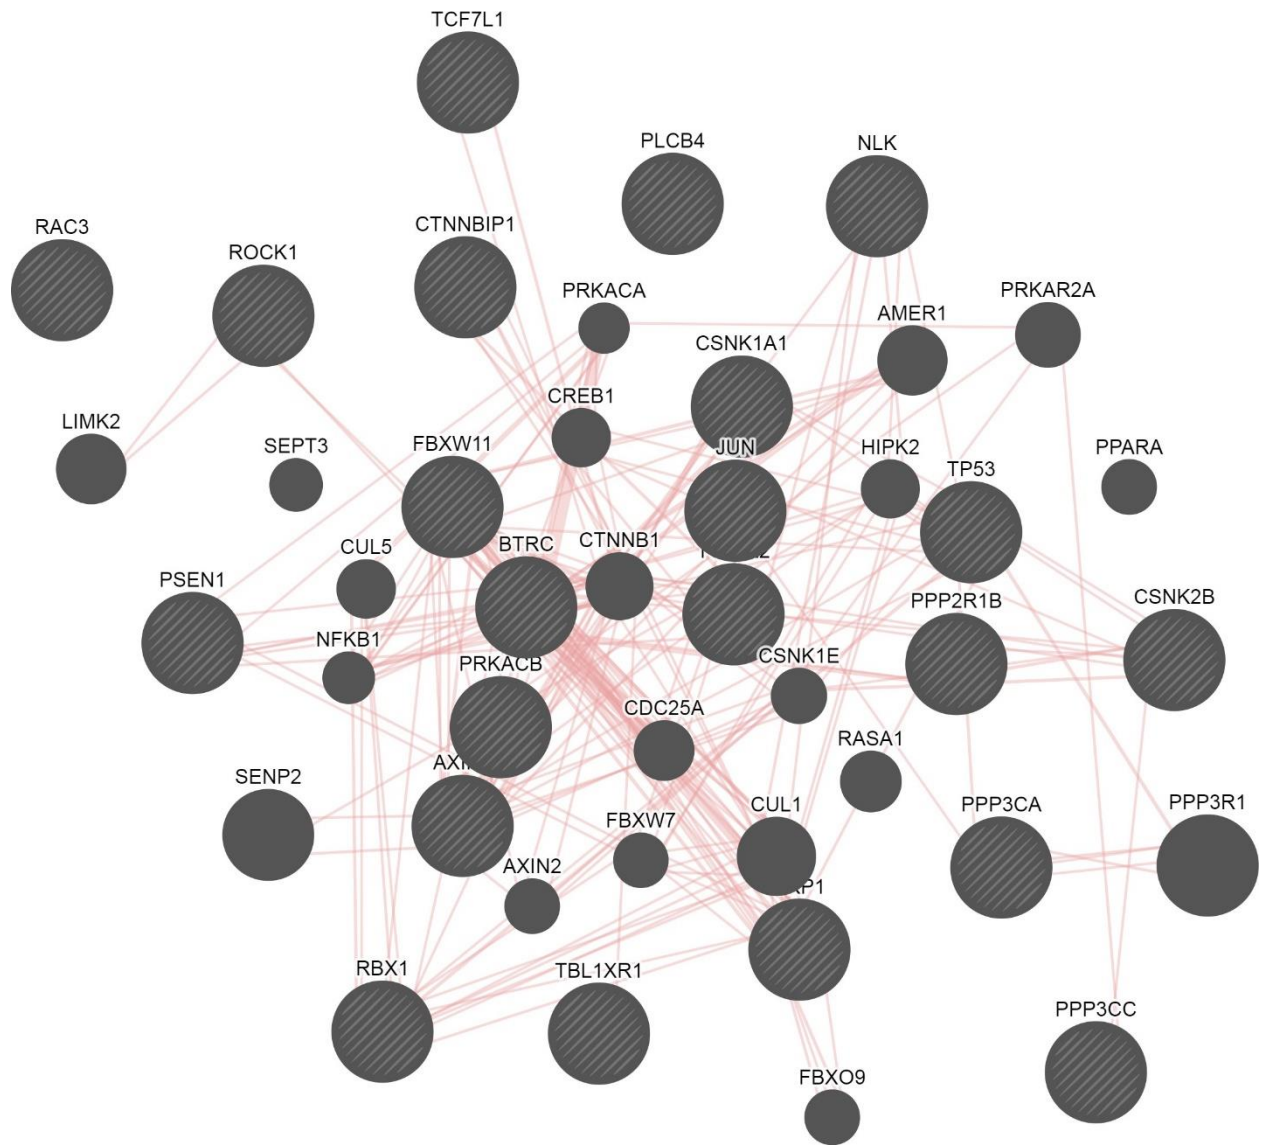

Supplement: 41598_2019_40299_MOESM1_ESM.pdf [file 41598_2019_40299_MOESM1_ESM.pdf]
